# Supplementary material for: Acute Response of Peripheral Blood Cell to Autologous Hematopoietic Stem Cell Transplantation in Type 1 Diabetic Patient
Source: PLoS One. 2012 Feb 22;7(2):e31887. doi: 10.1371/journal.pone.0031887 (PMC3285188; doi:10.1371/journal.pone.0031887)
Supplement: Table S1 — Genes dysregulated by HSCT in IF group and ID group. (XLS) [file pone.0031887.s002.xls]

## Sheet: IF up 
genes upregulated specifically by HSCT in IF group
probe set ID	Gene Symbol	Gene name(Description)	p-value	FDR	Geometric mean of intensities : T	Geometric mean of intensities : D	Fold change(T/D)	up/down
214617_at	PRF1	perforin 1 (pore forming protein)	0.0011315	0.00692115	10388	4509.56	2.30354	up
223126_s_at	C1orf21	chromosome 1 open reading frame 21	0.0007668	0.00647675	138.358	60.5276	2.28587	up
218638_s_at	SPON2	spondin 2, extracellular matrix protein	0.0024275	0.0085625	1044.83	457.089	2.28584	up
202877_s_at	CD93	CD93 molecule	0.0024721	0.00862565	421.682	186.475	2.26133	up
1563088_a_at	LOC284837	hypothetical LOC284837	0.0045622	0.0113711	307.745	138.389	2.22376	up
216748_at	PYHIN1	pyrin and HIN domain family, member 1	0.0079984	0.0144052	573.227	262.151	2.18663	up
211532_x_at	KIR2DS2	killer cell immunoglobulin-like receptor, two domains, short cytoplasmic tail, 2	0.0150524	0.0195278	209.297	95.9046	2.18235	up
206991_s_at	CCR5	chemokine (C-C motif) receptor 5	0.0010126	0.006794	557.873	255.984	2.17933	up
231776_at	EOMES	eomesodermin homolog (Xenopus laevis)	0.0020838	0.0081505	1157.4	535.788	2.16018	up
204731_at	TGFBR3	transforming growth factor, beta receptor III	0.0117832	0.0172331	1153.42	539.388	2.13839	up
236717_at	FAM179A	family with sequence similarity 179, member A	0.0002281	0.00484027	292.815	137.416	2.13086	up
202953_at	C1QB	complement component 1, q subcomponent, B chain	0.0009203	0.00669712	114.122	53.9134	2.11676	up
213906_at	MYBL1	v-myb myeloblastosis viral oncogene homolog (avian)-like 1	0.015018	0.0195278	1884.6	893.187	2.10997	up
211687_x_at	KIR3DL1	killer cell immunoglobulin-like receptor, three domains, long cytoplasmic tail,	0.0080409	0.0144656	137.585	65.3371	2.10578	up
233011_at	ANXA1	Annexin A1	0.0012782	0.00717248	3092.43	1483.39	2.08471	up
1555938_x_at	VIM	vimentin	0.0004341	0.00542735	1097.45	527.358	2.08104	up
229510_at	MS4A14	membrane-spanning 4-domains, subfamily A, member 14	0.004862	0.0116364	443.499	214.498	2.06761	up
222838_at	SLAMF7	SLAM family member 7	2.34e-05	0.0029079	1409.77	682.493	2.06562	up
226003_at	KIF21A	kinesin family member 21A	0.0087681	0.0150689	287.459	142.322	2.01979	up
207351_s_at	SH2D2A	SH2 domain protein 2A	0.0032207	0.00963525	509.787	252.645	2.0178	up
218272_at	TTC38	tetratricopeptide repeat domain 38	0.0012505	0.00716377	576.073	285.545	2.01745	up
217771_at	GOLM1	golgi membrane protein 1	0.000656	0.006462	248.241	123.812	2.00499	up
209197_at	SYT11	synaptotagmin XI	0.0019977	0.0080481	198.478	99.1182	2.00243	up
213915_at	NKG7	natural killer cell group 7 sequence	6.12e-05	0.00338178	8614.65	4325.66	1.99152	up
229121_at	CMKLR1	chemokine-like receptor 1	0.0102662	0.016102	168.874	84.9239	1.98853	up
202437_s_at	CYP1B1	cytochrome P450, family 1, subfamily B, polypeptide 1	0.0068349	0.0133658	572.169	288.322	1.98448	up
200628_s_at	WARS	tryptophanyl-tRNA synthetase	0.0011387	0.00692115	935.978	473.723	1.97579	up
231837_at	USP28	ubiquitin specific peptidase 28	0.000125	0.00381138	499.023	253.28	1.97025	up
207313_x_at	KIR3DL2 /// LOC727787	killer cell immunoglobulin-like receptor, three domains, long cytoplasmic tail,	0.0051254	0.0119309	193.25	98.1455	1.96901	up
205898_at	CX3CR1	chemokine (C-X3-C motif) receptor 1	0.0019252	0.00797477	9978.63	5090.96	1.96007	up
212845_at	SAMD4A	sterile alpha motif domain containing 4A	0.0285531	0.0274929	130.03	66.9968	1.94083	up
220266_s_at	KLF4	Kruppel-like factor 4 (gut)	1.35e-05	0.00272615	834.397	430.049	1.94024	up
219693_at	AGPAT4	1-acylglycerol-3-phosphate O-acyltransferase 4 (lysophosphatidic acid acyltransf	0.0002678	0.00497277	137.456	70.9345	1.93779	up
232383_at	TFEC	transcription factor EC	0.0082114	0.0145663	201.108	103.88	1.93597	up
211389_x_at	KIR3DS1	killer cell immunoglobulin-like receptor, three domains, short cytoplasmic tail,	0.0107349	0.0164412	112.74	58.2767	1.93457	up
208179_x_at	KIR2DL3	killer cell immunoglobulin-like receptor, two domains, long cytoplasmic tail, 3	0.0141886	0.0190222	145.634	75.4668	1.92978	up
221578_at	RASSF4	Ras association (RalGDS/AF-6) domain family member 4	0.0003391	0.0051382	174.959	90.6663	1.9297	up
210692_s_at	SLC43A3	solute carrier family 43, member 3	0.0009483	0.0067268	228.893	119.639	1.91319	up
225869_s_at	UNC93B1	unc-93 homolog B1 (C. elegans)	0.0165105	0.0203216	262.585	137.895	1.90424	up
206214_at	PLA2G7	phospholipase A2, group VII (platelet-activating factor acetylhydrolase, plasma)	0.0035204	0.00994267	343.619	180.51	1.9036	up
217507_at	SLC11A1	solute carrier family 11 (proton-coupled divalent metal ion transporters), membe	0.0112643	0.0169122	164.297	86.8046	1.89272	up
211864_s_at	MYOF	myoferlin	0.0004279	0.00540058	155.856	82.361	1.89235	up
1557985_s_at	CEP78	centrosomal protein 78kDa	0.0056673	0.0123556	171.586	90.7435	1.89089	up
1555759_a_at	CCL5	chemokine (C-C motif) ligand 5	0.0002488	0.00497277	11924	6312.03	1.88909	up
206978_at	CCR2	chemokine (C-C motif) receptor 2	0.0132861	0.0183137	1860.5	985.497	1.88788	up
1552497_a_at	SLAMF6	SLAM family member 6	0.0019074	0.00794177	620.058	330.847	1.87416	up
200787_s_at	PEA15	phosphoprotein enriched in astrocytes 15	0.0013479	0.0073027	313.44	168.387	1.86142	up
202743_at	PIK3R3	phosphoinositide-3-kinase, regulatory subunit 3 (gamma)	0.0034605	0.0099106	62.1129	33.3968	1.85985	up
220532_s_at	TMEM176B	transmembrane protein 176B	0.0118223	0.0172685	746.383	403.49	1.84982	up
223816_at	SLC46A2	solute carrier family 46, member 2	0.0119422	0.0173211	472.097	255.258	1.84949	up
207704_s_at	GAS7	growth arrest-specific 7	0.0011875	0.00697895	152.77	82.8294	1.8444	up
225525_at	KIAA1671	KIAA1671	0.0272799	0.0267419	226.099	122.68	1.843	up
211776_s_at	EPB41L3	erythrocyte membrane protein band 4.1-like 3	0.0109442	0.0166639	269.757	146.392	1.8427	up
221417_x_at	S1PR5	sphingosine-1-phosphate receptor 5	0.0001234	0.00381138	79.0579	42.9155	1.84218	up
219714_s_at	CACNA2D3	calcium channel, voltage-dependent, alpha 2/delta subunit 3	0.0350995	0.0310663	550.62	299.19	1.84037	up
203989_x_at	F2R	coagulation factor II (thrombin) receptor	0.0003356	0.0051382	226.942	123.618	1.83583	up
223344_s_at	MS4A7	membrane-spanning 4-domains, subfamily A, member 7	0.0025998	0.00881225	1727.59	942.333	1.83331	up
230110_at	MCOLN2	mucolipin 2	0.0014609	0.0074389	558.391	304.69	1.83265	up
217078_s_at	CD300A	CD300a molecule	0.0019564	0.00799835	967.429	528.195	1.83158	up
211469_s_at	CXCR6	chemokine (C-X-C motif) receptor 6	9.35e-05	0.0038045	97.3326	53.1762	1.83038	up
210220_at	FZD2	frizzled homolog 2 (Drosophila)	0.0209333	0.0231539	232.04	127.157	1.82483	up
210890_x_at	KIR2DL1	killer cell immunoglobulin-like receptor, two domains, long cytoplasmic tail, 1	0.0105003	0.0162795	145.919	80.4522	1.81374	up
216676_x_at	KIR3DL3	killer cell immunoglobulin-like receptor, three domains, long cytoplasmic tail,	0.0124694	0.0176087	241.471	133.138	1.8137	up
224901_at	SCD5	stearoyl-CoA desaturase 5	0.0015245	0.00750862	62.3054	34.3689	1.81284	up
1554240_a_at	ITGAL	integrin, alpha L (antigen CD11A (p180), lymphocyte function-associated antigen	0.0008078	0.006525	3259.67	1798.95	1.81199	up
200785_s_at	LRP1	low density lipoprotein-related protein 1 (alpha-2-macroglobulin receptor)	2.82e-05	0.00295503	254.549	140.851	1.80722	up
204150_at	STAB1	stabilin 1	0.0005013	0.00578465	755.792	419.199	1.80294	up
220566_at	PIK3R5	phosphoinositide-3-kinase, regulatory subunit 5	0.005356	0.0120418	244.611	135.981	1.79886	up
222774_s_at	NETO2	neuropilin (NRP) and tolloid (TLL)-like 2	3.9e-06	0.00180935	107.258	59.6745	1.79739	up
209683_at	FAM49A	family with sequence similarity 49, member A	0.0016325	0.0076843	423.801	236.239	1.79395	up
206011_at	CASP1	caspase 1, apoptosis-related cysteine peptidase (interleukin 1, beta, convertase	0.0018302	0.00781365	2797.02	1560.71	1.79215	up
209499_x_at	TNFSF12-TNFSF13 /// TNFSF13	TNFSF12-TNFSF13 readthrough transcript /// tumor necrosis factor (ligand) superf	0.0022968	0.00833815	1277.91	715.208	1.78677	up
210569_s_at	SIGLEC9	sialic acid binding Ig-like lectin 9	0.0052386	0.0119851	170.615	95.5527	1.78556	up
206267_s_at	MATK	megakaryocyte-associated tyrosine kinase	0.0021853	0.0082678	564.744	316.299	1.78547	up
229192_s_at	TBCD	tubulin folding cofactor D	0.0033695	0.0097806	89.3065	50.0244	1.78526	up
228788_at	YPEL1	yippee-like 1 (Drosophila)	0.0057964	0.0124835	316.024	177.429	1.78113	up
219385_at	SLAMF8	SLAM family member 8	0.0003159	0.0051382	62.5081	35.1403	1.77882	up
1553378_a_at	C17orf66	chromosome 17 open reading frame 66	3.66e-05	0.00295503	35.4328	19.9592	1.77526	up
222923_s_at	KCNE3	potassium voltage-gated channel, Isk-related family, member 3	0.0018331	0.00781365	85.3935	48.2434	1.77006	up
224674_at	TTYH3	tweety homolog 3 (Drosophila)	3.44e-05	0.00295503	399.051	225.699	1.76807	up
208198_x_at	KIR2DS1	killer cell immunoglobulin-like receptor, two domains, short cytoplasmic tail, 1	0.0073769	0.0136977	211.008	119.622	1.76396	up
222757_s_at	ZAK	sterile alpha motif and leucine zipper containing kinase AZK	0.004606	0.0113711	192.069	109.192	1.759	up
1554503_a_at	OSCAR	osteoclast associated, immunoglobulin-like receptor	0.0217036	0.0236587	554.881	315.856	1.75675	up
204858_s_at	TYMP	thymidine phosphorylase	0.0032895	0.00973907	1493.03	851.296	1.75384	up
234985_at	LDLRAD3	low density lipoprotein receptor class A domain containing 3	0.0004209	0.00540058	111.091	63.3911	1.75247	up
214058_at	MYCL1	v-myc myelocytomatosis viral oncogene homolog 1, lung carcinoma derived (avian)	0.0203836	0.0227472	590.862	337.353	1.75147	up
239431_at	TICAM2 /// TMED7-TICAM2	toll-like receptor adaptor molecule 2 /// TMED7-TICAM2 read-through transcript	0.0034661	0.0099106	127.4	72.9423	1.74659	up
205789_at	CD1D	CD1d molecule	0.0099925	0.0159672	1386.74	799.097	1.73539	up
205756_s_at	F8	coagulation factor VIII, procoagulant component	3.33e-05	0.00295503	161.033	92.9402	1.73265	up
219607_s_at	MS4A4A	membrane-spanning 4-domains, subfamily A, member 4	0.0226256	0.0241642	254.169	147.138	1.72742	up
204205_at	APOBEC3G	apolipoprotein B mRNA editing enzyme, catalytic polypeptide-like 3G	0.0001997	0.00484027	3398.21	1968.28	1.72649	up
1559051_s_at	C6orf150	chromosome 6 open reading frame 150	0.0016873	0.0076843	70.4516	40.8074	1.72644	up
211397_x_at	KIR2DL2	killer cell immunoglobulin-like receptor, two domains, long cytoplasmic tail, 2	0.0152514	0.0196167	187.641	108.73	1.72575	up
208130_s_at	TBXAS1	thromboxane A synthase 1 (platelet)	0.002058	0.0081505	649.603	376.871	1.72367	up
204526_s_at	TBC1D8	TBC1 domain family, member 8 (with GRAM domain)	0.0076604	0.014043	622.817	361.935	1.7208	up
236782_at	SAMD3	sterile alpha motif domain containing 3	0.0048238	0.0115793	1474.09	857.557	1.71894	up
211336_x_at	LILRB1	leukocyte immunoglobulin-like receptor, subfamily B (with TM and ITIM domains),	0.0010918	0.00683645	783.772	456.089	1.71846	up
57715_at	CALHM2	calcium homeostasis modulator 2	0.0031776	0.00955942	786.106	457.878	1.71685	up
213236_at	SASH1	SAM and SH3 domain containing 1	0.0022169	0.00827463	188.148	109.602	1.71666	up
204036_at	LPAR1	lysophosphatidic acid receptor 1	0.0129719	0.0180345	86.7	50.5536	1.71501	up
205686_s_at	CD86	CD86 molecule	0.0025397	0.00874362	510.638	297.852	1.7144	up
211410_x_at	KIR2DL5A	killer cell immunoglobulin-like receptor, two domains, long cytoplasmic tail, 5A	0.0259039	0.0260512	212.33	123.897	1.71376	up
212443_at	NBEAL2	neurobeachin-like 2	0.0312875	0.028949	1285.81	750.345	1.71363	up
208426_x_at	KIR2DL3 /// KIR2DL4 /// KIR2DL5A	killer cell immunoglobulin-like receptor, two domains, long cytoplasmic tail, 3	0.0124608	0.0176087	54.8143	31.9889	1.71354	up
203060_s_at	PAPSS2	3'-phosphoadenosine 5'-phosphosulfate synthase 2	0.0101697	0.0160835	180.506	105.424	1.7122	up
200827_at	PLOD1	procollagen-lysine 1, 2-oxoglutarate 5-dioxygenase 1	0.0035046	0.00991538	387.023	226.68	1.70735	up
219316_s_at	FLVCR2	feline leukemia virus subgroup C cellular receptor family, member 2	0.0002278	0.00484027	215.981	126.674	1.70502	up
229055_at	GPR68	G protein-coupled receptor 68	0.0056669	0.0123556	261.1	153.387	1.70223	up
208122_x_at	KIR2DS3	killer cell immunoglobulin-like receptor, two domains, short cytoplasmic tail, 3	0.0047	0.011428	44.3591	26.0801	1.70088	up
1552501_a_at	GPBAR1	G protein-coupled bile acid receptor 1	0.0016152	0.0076843	713.401	419.553	1.70039	up
214500_at	H2AFY	H2A histone family, member Y	0.0401466	0.0335428	572.125	336.511	1.70017	up
219256_s_at	SH3TC1	SH3 domain and tetratricopeptide repeats 1	0.0007788	0.00647675	802.006	472.055	1.69897	up
204451_at	FZD1	frizzled homolog 1 (Drosophila)	0.0268279	0.0265241	224.896	132.651	1.6954	up
227792_at	ITPRIPL2	inositol 1,4,5-triphosphate receptor interacting protein-like 2	0.0164893	0.0203216	692.987	408.786	1.69523	up
209813_x_at	TARP	TCR gamma alternate reading frame protein	0.0027206	0.00890665	2610.8	1540.68	1.69457	up
202545_at	PRKCD	protein kinase C, delta	0.0150258	0.0195278	1031.69	608.868	1.69445	up
233555_s_at	SULF2	sulfatase 2	0.0033716	0.0097806	610.717	360.572	1.69375	up
208203_x_at	KIR2DS5	killer cell immunoglobulin-like receptor, two domains, short cytoplasmic tail, 5	0.0175075	0.0209797	337.419	199.445	1.69179	up
213385_at	CHN2	chimerin (chimaerin) 2	0.0026359	0.0088334	578.226	342.486	1.68832	up
227799_at	MYO1G	myosin IG	0.0008374	0.00658297	1306.16	775.595	1.68407	up
223740_at	C6orf59	chromosome 6 open reading frame 59	2.18e-05	0.0029079	186.593	110.91	1.68239	up
229441_at	PRSS23	Protease, serine, 23	0.0020451	0.00813757	62.758	37.325	1.68139	up
1559502_s_at	LRRC25	leucine rich repeat containing 25	0.0174745	0.0209733	424.507	252.517	1.6811	up
207872_s_at	LILRA1	leukocyte immunoglobulin-like receptor, subfamily A (with TM domain), member 1	0.0009538	0.0067268	128.273	76.3321	1.68046	up
216950_s_at	FCGR1A /// FCGR1C	Fc fragment of IgG, high affinity Ia, receptor (CD64) /// Fc fragment of IgG, hi	0.007339	0.0136977	813.118	484.97	1.67664	up
213746_s_at	FLNA	filamin A, alpha	0.0193541	0.0221121	1475.42	881.04	1.67464	up
231769_at	FBXO6	F-box protein 6	0.0042391	0.0110055	805.341	481.056	1.67411	up
209371_s_at	SH3BP2	SH3-domain binding protein 2	0.0016199	0.0076843	374.635	224.314	1.67014	up
236008_at	LOC100128909	similar to hCG1817494	0.0024493	0.00858318	59.1174	35.4499	1.66763	up
210756_s_at	NOTCH2	Notch homolog 2 (Drosophila)	0.030927	0.0288237	456.385	273.864	1.66647	up
228624_at	TMEM144	transmembrane protein 144	0.0202889	0.0226829	132.387	79.5611	1.66396	up
219168_s_at	ARHGAP8 /// PRR5	Rho GTPase activating protein 8 /// proline rich 5 (renal)	0.0132026	0.0182756	191.432	115.091	1.66331	up
216920_s_at	TARP /// TRGC2	TCR gamma alternate reading frame protein /// T cell receptor gamma constant 2	0.0026055	0.00881225	4099.44	2464.63	1.66331	up
222668_at	KCTD15	potassium channel tetramerisation domain containing 15	0.0051908	0.0119625	152.779	91.9113	1.66225	up
226576_at	ARHGAP26	Rho GTPase activating protein 26	0.0037042	0.0102118	609.717	366.905	1.66178	up
1553043_a_at	CD300LF	CD300 molecule-like family member f	0.0110447	0.0166975	2178.69	1311.94	1.66066	up
222620_s_at	DNAJC1	DnaJ (Hsp40) homolog, subfamily C, member 1	0.0394094	0.0332036	409.782	246.915	1.65961	up
208594_x_at	LILRA6	leukocyte immunoglobulin-like receptor, subfamily A (with TM domain), member 6	0.0150948	0.0195554	359.67	216.729	1.65953	up
220832_at	TLR8	toll-like receptor 8	0.0124397	0.0176087	222.931	134.343	1.65941	up
224428_s_at	CDCA7	cell division cycle associated 7	0.0058583	0.0125411	241.694	145.802	1.65769	up
203104_at	CSF1R	colony stimulating factor 1 receptor	0.0062458	0.0128573	614.334	371.193	1.65503	up
235678_at	GM2A	GM2 ganglioside activator	4.04e-05	0.00295503	144.14	87.3977	1.64925	up
206934_at	SIRPB1	signal-regulatory protein beta 1	0.0346651	0.0308209	260.351	158.042	1.64735	up
206618_at	IL18R1	interleukin 18 receptor 1	0.0124938	0.0176218	247.381	150.191	1.64711	up
203658_at	SLC25A20	solute carrier family 25 (carnitine/acylcarnitine translocase), member 20	0.0034453	0.00990877	1000.53	607.543	1.64686	up
204385_at	KYNU	kynureninase (L-kynurenine hydrolase)	0.0011586	0.0069323	299.463	182.186	1.64372	up
207697_x_at	LILRB2	leukocyte immunoglobulin-like receptor, subfamily B (with TM and ITIM domains),	0.0060942	0.0127199	2103.31	1280.07	1.64312	up
220307_at	CD244	CD244 molecule, natural killer cell receptor 2B4	0.0010656	0.006794	848.737	517.032	1.64156	up
210222_s_at	RTN1	reticulon 1	0.0101798	0.0160835	522.058	318.496	1.63913	up
215236_s_at	PICALM	phosphatidylinositol binding clathrin assembly protein	0.0487909	0.0374231	92.0937	56.2631	1.63684	up
1569496_s_at	LOC100130872	hypothetical LOC100130872	0.0012398	0.00712775	223.606	136.622	1.63668	up
232846_s_at	CDH23	cadherin-like 23	0.0012806	0.00717248	91.3054	55.8016	1.63625	up
230753_at	PATL2	protein associated with topoisomerase II homolog 2 (yeast)	0.0122695	0.017541	623.367	381.255	1.63504	up
218927_s_at	CHST12	carbohydrate (chondroitin 4) sulfotransferase 12	0.0002171	0.00484027	732.498	448.822	1.63204	up
206729_at	TNFRSF8	tumor necrosis factor receptor superfamily, member 8	0.0051001	0.0119064	141.642	86.7923	1.63196	up
231357_at	CLEC12B	C-type lectin domain family 12, member B	0.0370828	0.0319847	64.9479	39.8287	1.63068	up
212472_at	MICAL2	microtubule associated monoxygenase, calponin and LIM domain containing 2	0.0052291	0.0119851	397.075	243.617	1.62992	up
212136_at	ATP2B4	ATPase, Ca++ transporting, plasma membrane 4	0.0042458	0.0110055	728.766	447.508	1.6285	up
203665_at	HMOX1	heme oxygenase (decycling) 1	0.0020291	0.00809385	922.401	567.139	1.62641	up
203767_s_at	STS	steroid sulfatase (microsomal), isozyme S	0.0008834	0.00665738	65.9841	40.5903	1.62561	up
212777_at	SOS1	son of sevenless homolog 1 (Drosophila)	0.0069017	0.0134334	144.128	88.8735	1.62172	up
227276_at	PLXDC2	plexin domain containing 2	0.0045856	0.0113711	245.956	151.761	1.62068	up
222061_at	CD58	CD58 molecule	0.0082141	0.0145663	208.804	128.84	1.62065	up
208010_s_at	PTPN22	protein tyrosine phosphatase, non-receptor type 22 (lymphoid)	0.0168704	0.0206003	67.1757	41.4958	1.61886	up
230807_at	CCDC151	coiled-coil domain containing 151	0.0050255	0.0118348	68.9752	42.6195	1.61839	up
228361_at	E2F2	E2F transcription factor 2	0.0370198	0.0319474	363.913	224.967	1.61763	up
209616_s_at	CES1	carboxylesterase 1 (monocyte/macrophage serine esterase 1)	0.0013516	0.0073027	489.605	302.948	1.61614	up
203139_at	DAPK1	death-associated protein kinase 1	0.0143263	0.0191116	886.334	548.455	1.61606	up
206100_at	CPM	carboxypeptidase M	0.0054323	0.0121047	90.4857	56.0047	1.61568	up
206488_s_at	CD36	CD36 molecule (thrombospondin receptor)	0.0008749	0.00663567	1289.24	798.003	1.61559	up
200866_s_at	PSAP	prosaposin	0.0065745	0.0131405	6637.28	4111.18	1.61445	up
211732_x_at	HNMT	histamine N-methyltransferase	0.0105396	0.0163091	527.487	327.037	1.61293	up
243969_at	SLC24A4	solute carrier family 24 (sodium/potassium/calcium exchanger), member 4	0.0264658	0.0263239	359.33	222.843	1.61248	up
205884_at	ITGA4	integrin, alpha 4 (antigen CD49D, alpha 4 subunit of VLA-4 receptor)	0.0037325	0.0102723	230.507	142.96	1.61239	up
210959_s_at	SRD5A1	steroid-5-alpha-reductase, alpha polypeptide 1 (3-oxo-5 alpha-steroid delta 4-de	0.0009005	0.00669712	165.956	102.997	1.61127	up
212728_at	DLG3	discs, large homolog 3 (Drosophila)	0.0038254	0.0104691	146.465	90.9215	1.61089	up
219991_at	SLC2A9	solute carrier family 2 (facilitated glucose transporter), member 9	0.0045736	0.0113711	130.761	81.3036	1.60831	up
203331_s_at	INPP5D	inositol polyphosphate-5-phosphatase, 145kDa	0.0086899	0.0150145	316.771	197.117	1.60702	up
211610_at	KLF6	Kruppel-like factor 6	0.0432482	0.0348292	104.495	65.0742	1.60578	up
205076_s_at	MTMR11	myotubularin related protein 11	0.0171428	0.0207914	623.238	388.146	1.60568	up
1562698_x_at	LOC339988	hypothetical protein LOC339988	0.0033423	0.0097806	517.626	322.716	1.60397	up
212224_at	ALDH1A1	aldehyde dehydrogenase 1 family, member A1	0.01861	0.0217229	646.909	403.571	1.60296	up
202943_s_at	NAGA	N-acetylgalactosaminidase, alpha-	0.0005587	0.006151	731.477	456.523	1.60228	up
235175_at	GBP4	guanylate binding protein 4	0.0089997	0.0151462	568.658	355.343	1.60031	up
223392_s_at	TSHZ3	teashirt zinc finger homeobox 3	0.0369865	0.0319474	126.967	79.4159	1.59876	up
202510_s_at	TNFAIP2	tumor necrosis factor, alpha-induced protein 2	0.0074733	0.0137979	2341.49	1465.84	1.59737	up
218876_at	TPPP3	tubulin polymerization-promoting protein family member 3	0.0155788	0.0198315	151.592	94.9607	1.59636	up
235670_at	STX11	syntaxin 11	0.0261896	0.0261977	948.844	594.92	1.59491	up
212254_s_at	DST	dystonin	0.0009719	0.00679203	87.906	55.1466	1.59404	up
215049_x_at	CD163	CD163 molecule	0.005223	0.0119851	1742.34	1093.74	1.59301	up
207224_s_at	SIGLEC7	sialic acid binding Ig-like lectin 7	0.0152653	0.019619	639.715	401.812	1.59208	up
227015_at	ASPHD2	aspartate beta-hydroxylase domain containing 2	0.0066937	0.0132778	144.278	90.6274	1.59199	up
218232_at	C1QA	complement component 1, q subcomponent, A chain	0.0052656	0.0119851	122.265	76.8736	1.59047	up
208438_s_at	FGR	Gardner-Rasheed feline sarcoma viral (v-fgr) oncogene homolog	0.0117005	0.0171778	6661.56	4193.35	1.5886	up
1552258_at	NCRNA00152	non-protein coding RNA 152	7.77e-05	0.00365015	82.9455	52.217	1.58848	up
219666_at	MS4A6A	membrane-spanning 4-domains, subfamily A, member 6A	0.0064052	0.0130159	2849.99	1797.16	1.58583	up
226799_at	FGD6	FYVE, RhoGEF and PH domain containing 6	0.0015418	0.00757075	62.3712	39.3625	1.58453	up
225776_at	RBMS2	RNA binding motif, single stranded interacting protein 2	0.0070765	0.0135612	72.426	45.7849	1.58187	up
228365_at	CPNE8	copine VIII	0.0122071	0.0174843	131.143	82.9684	1.58064	up
210997_at	HGF	hepatocyte growth factor (hepapoietin A; scatter factor)	0.0288861	0.0276376	45.3707	28.7145	1.58006	up
205306_x_at	KMO	kynurenine 3-monooxygenase (kynurenine 3-hydroxylase)	0.0050126	0.0118348	206.935	131.003	1.57962	up
1554464_a_at	CRTAP	cartilage associated protein	0.0120653	0.0174031	361.163	228.825	1.57834	up
217140_s_at	VDAC1	voltage-dependent anion channel 1	0.0313868	0.0290076	237.837	150.741	1.57779	up
203823_at	RGS3	regulator of G-protein signaling 3	0.0086375	0.0149894	775.31	491.881	1.57622	up
206999_at	IL12RB2	interleukin 12 receptor, beta 2	0.0040006	0.0106826	46.06	29.2521	1.57459	up
218345_at	TMEM176A	transmembrane protein 176A	0.0219554	0.0237847	392.402	249.359	1.57364	up
1553311_at	C20orf197	chromosome 20 open reading frame 197	0.0232653	0.0245174	46.8529	29.7919	1.57267	up
218832_x_at	ARRB1	arrestin, beta 1	0.0020812	0.0081505	121.175	77.0782	1.57211	up
1555789_s_at	PHF23	PHD finger protein 23	0.0061492	0.012803	198.255	126.247	1.57037	up
226517_at	BCAT1	branched chain aminotransferase 1, cytosolic	0.0054107	0.0120899	87.7639	55.949	1.56864	up
210166_at	TLR5	toll-like receptor 5	0.0262608	0.0262202	307.855	196.319	1.56814	up
224908_s_at	TTL	tubulin tyrosine ligase	0.0017617	0.0076843	146.25	93.3054	1.56743	up
206277_at	P2RY2	purinergic receptor P2Y, G-protein coupled, 2	0.0463544	0.0361932	85.9789	54.9297	1.56525	up
228176_at	S1PR3	sphingosine-1-phosphate receptor 3	0.022164	0.0239216	511.114	326.587	1.56501	up
217584_at	NPC1	Niemann-Pick disease, type C1	0.0084749	0.0148495	75.1955	48.0485	1.56499	up
201646_at	SCARB2	scavenger receptor class B, member 2	0.0029209	0.00921625	49.3338	31.5396	1.56419	up
210314_x_at	TNFSF13	tumor necrosis factor (ligand) superfamily, member 13	0.0036306	0.0100951	1474.18	942.931	1.5634	up
206746_at	BFSP1	beaded filament structural protein 1, filensin	0.0003022	0.0051382	42.053	26.9368	1.56117	up
219788_at	PILRA	paired immunoglobin-like type 2 receptor alpha	0.0231546	0.0244547	920.322	589.659	1.56077	up
225105_at	C12orf75	chromosome 12 open reading frame 75	0.0053608	0.0120418	1144.34	733.539	1.56003	up
203805_s_at	FANCA	Fanconi anemia, complementation group A	0.0002007	0.00484027	159.936	102.522	1.56	up
213395_at	MLC1	megalencephalic leukoencephalopathy with subcortical cysts 1	0.0152246	0.0195979	150.008	96.2068	1.55922	up
227013_at	LATS2	LATS, large tumor suppressor, homolog 2 (Drosophila)	0.0120931	0.0174276	657.82	421.975	1.55891	up
235593_at	ZEB2	zinc finger E-box binding homeobox 2	0.0004732	0.00566137	656.755	421.961	1.55644	up
223696_at	ARSD	arylsulfatase D	0.0221669	0.0239216	364.71	234.469	1.55547	up
1555643_s_at	LILRA5	leukocyte immunoglobulin-like receptor, subfamily A (with TM domain), member 5	0.0498787	0.0377433	781.555	502.463	1.55545	up
212807_s_at	SORT1	sortilin 1	0.0170148	0.0206672	162.717	104.697	1.55417	up
212791_at	C1orf216	chromosome 1 open reading frame 216	0.0033722	0.0097806	324.622	208.995	1.55325	up
1569827_at	ATG7	ATG7 autophagy related 7 homolog (S. cerevisiae)	0.0001459	0.00413512	38.7169	24.9304	1.553	up
207376_at	VENTX	VENT homeobox homolog (Xenopus laevis)	0.0006241	0.006462	186.564	120.187	1.55228	up
204787_at	VSIG4	V-set and immunoglobulin domain containing 4	0.0051896	0.0119625	119.407	76.9479	1.55179	up
200900_s_at	M6PR	mannose-6-phosphate receptor (cation dependent)	0.0246071	0.0253041	613.478	396.828	1.54595	up
228933_at	NHS	Nance-Horan syndrome (congenital cataracts and dental anomalies)	0.0497477	0.0376958	91.9927	59.5162	1.54567	up
236094_at	TCF7L2	Transcription factor 7-like 2 (T-cell specific, HMG-box)	0.0001271	0.00381138	81.024	52.4215	1.54563	up
222760_at	ZNF703	zinc finger protein 703	0.030832	0.0287742	342.645	221.791	1.5449	up
220146_at	TLR7	toll-like receptor 7	0.0417528	0.0342742	304.911	197.549	1.54348	up
205640_at	ALDH3B1	aldehyde dehydrogenase 3 family, member B1	0.0214146	0.0234276	527.943	342.357	1.54208	up
205418_at	FES	feline sarcoma oncogene	0.0497314	0.0376958	490.963	318.748	1.54029	up
203922_s_at	CYBB	cytochrome b-245, beta polypeptide	0.0046148	0.0113711	967.994	628.8	1.53943	up
218627_at	DRAM1	DNA-damage regulated autophagy modulator 1	0.0363925	0.0317452	430.151	279.428	1.5394	up
208917_x_at	NADK	NAD kinase	0.0344079	0.0306427	250.265	162.612	1.53903	up
225300_at	C15orf23	chromosome 15 open reading frame 23	0.0399658	0.0334359	130.586	84.8624	1.53879	up
200838_at	CTSB	cathepsin B	0.0004191	0.00540058	2528.11	1644.54	1.53727	up
200907_s_at	PALLD	palladin, cytoskeletal associated protein	0.0065804	0.0131405	87.8989	57.1802	1.53723	up
206743_s_at	ASGR1	asialoglycoprotein receptor 1	0.0068587	0.0133658	345.151	224.607	1.53669	up
222654_at	IMPAD1	inositol monophosphatase domain containing 1	7.08e-05	0.0035743	133.224	86.706	1.5365	up
214544_s_at	SNAP23	synaptosomal-associated protein, 23kDa	0.0188433	0.0218531	101.106	65.839	1.53566	up
204039_at	CEBPA	CCAAT/enhancer binding protein (C/EBP), alpha	0.0207218	0.0230076	1243.32	810.063	1.53485	up
1552737_s_at	WWP2	WW domain containing E3 ubiquitin protein ligase 2	0.0457374	0.0358858	32.6806	21.331	1.53207	up
227080_at	ZNF697	zinc finger protein 697	0.0063999	0.0130159	85.0331	55.551	1.53072	up
219935_at	ADAMTS5	ADAM metallopeptidase with thrombospondin type 1 motif, 5	0.0158736	0.0199874	47.6999	31.1802	1.52981	up
218318_s_at	NLK	nemo-like kinase	0.0364255	0.0317568	102.752	67.1803	1.5295	up
216899_s_at	SKAP2	src kinase associated phosphoprotein 2	0.0365491	0.0317885	361.85	236.648	1.52907	up
202767_at	ACP2	acid phosphatase 2, lysosomal	0.0001599	0.0043753	218.969	143.323	1.5278	up
210184_at	ITGAX	integrin, alpha X (complement component 3 receptor 4 subunit)	0.0413762	0.0341037	1311.52	858.911	1.52695	up
205842_s_at	JAK2	Janus kinase 2	0.0098403	0.0158022	374.969	245.825	1.52535	up
230634_x_at	ADAT3	adenosine deaminase, tRNA-specific 3, TAD3 homolog (S. cerevisiae)	0.0060562	0.0126605	96.4251	63.2479	1.52456	up
213566_at	RNASE6	ribonuclease, RNase A family, k6	0.0024903	0.00863322	3324.32	2181.75	1.52369	up
207085_x_at	CSF2RA	colony stimulating factor 2 receptor, alpha, low-affinity (granulocyte-macrophag	0.0427764	0.0346947	347.715	228.287	1.52315	up
208983_s_at	PECAM1	platelet/endothelial cell adhesion molecule	0.0085337	0.0149087	827.493	545.07	1.51814	up
204197_s_at	RUNX3	runt-related transcription factor 3	0.022837	0.0242774	3316	2188.01	1.51553	up
205469_s_at	IRF5	interferon regulatory factor 5	0.000831	0.00658297	509.771	337.231	1.51164	up
1553196_a_at	FCRL3	Fc receptor-like 3	0.0053045	0.0119942	146.615	97.0872	1.51013	up
210993_s_at	SMAD1	SMAD family member 1	0.0142328	0.0190656	94.6794	62.7013	1.51001	up
209136_s_at	USP10	ubiquitin specific peptidase 10	0.0302221	0.0284853	49.9974	33.1118	1.50996	up
240037_at	ITPRIPL1	inositol 1,4,5-triphosphate receptor interacting protein-like 1	0.0012831	0.00717248	71.9085	47.6783	1.5082	up
233210_at	FLJ12120	hypothetical LOC388439	0.0032976	0.00973907	56.6245	37.5905	1.50635	up
202578_s_at	DDX19A	DEAD (Asp-Glu-Ala-As) box polypeptide 19A	0.0151694	0.0195697	196.593	130.677	1.50442	up
227899_at	VIT	vitrin	0.0023335	0.00841672	43.13	28.6703	1.50434	up
221188_s_at	CIDEB	cell death-inducing DFFA-like effector b	0.0090009	0.0151462	386.315	256.832	1.50415	up
201487_at	CTSC	cathepsin C	0.0007556	0.00647675	2306.37	1534.06	1.50344	up
229543_at	FAM26F	Family with sequence similarity 26, member F	0.0224761	0.0240889	220.654	146.792	1.50317	up
208018_s_at	HCK	hemopoietic cell kinase	0.027353	0.0267973	3220.44	2143.01	1.50277	up
210784_x_at	LILRA6 /// LILRB3	leukocyte immunoglobulin-like receptor, subfamily A (with TM domain), member 6 /	0.0319031	0.0293875	1152.71	767.139	1.5026	up
221802_s_at	KIAA1598	KIAA1598	0.008326	0.0147163	691.884	460.575	1.50222	up
210152_at	LILRB4	leukocyte immunoglobulin-like receptor, subfamily B (with TM and ITIM domains),	0.0012584	0.00717248	173.629	115.589	1.50212	up
206380_s_at	CFP	complement factor properdin	0.0130695	0.018139	2934.12	1953.87	1.50169	up
211135_x_at	LILRB3	leukocyte immunoglobulin-like receptor, subfamily B (with TM and ITIM domains),	0.0335808	0.0302396	1178.24	785.3	1.50036	up
1555736_a_at	AGTRAP	angiotensin II receptor-associated protein	0.0336854	0.0302965	1356.82	904.42	1.50021	up
204277_s_at	TK2	thymidine kinase 2, mitochondrial	0.0038429	0.0104691	160.768	107.185	1.49991	up
221879_at	CALML4	calmodulin-like 4	0.0126932	0.0177694	355.478	237.028	1.49973	up
223413_s_at	LYAR	Ly1 antibody reactive homolog (mouse)	0.0185656	0.0216924	599.145	399.999	1.49787	up
227195_at	ZNF503	zinc finger protein 503	0.004171	0.0109387	139.548	93.3003	1.49569	up
202236_s_at	SLC16A1	solute carrier family 16, member 1 (monocarboxylic acid transporter 1)	0.0280837	0.0272651	105.607	70.6091	1.49566	up
229059_at	C9orf109 /// C9orf110	chromosome 9 open reading frame 109 /// chromosome 9 open reading frame 110	0.0114027	0.017028	63.8906	42.7457	1.49467	up
1557749_at	EHBP1L1	EH domain binding protein 1-like 1	0.0149063	0.0194963	131.663	88.1783	1.49315	up
211240_x_at	CTNND1	catenin (cadherin-associated protein), delta 1	0.0027051	0.00890303	156.198	104.662	1.49241	up
213851_at	TMEM110	transmembrane protein 110	0.0066069	0.0131608	144.766	97.0817	1.49118	up
205158_at	RNASE4	ribonuclease, RNase A family, 4	0.0121761	0.0174843	127.346	85.4972	1.48948	up
204639_at	ADA	adenosine deaminase	0.0104158	0.016227	1330.96	894.013	1.48875	up
211404_s_at	APLP2	amyloid beta (A4) precursor-like protein 2	0.0026273	0.0088334	1791.41	1204.16	1.48768	up
202593_s_at	GDE1	glycerophosphodiester phosphodiesterase 1	0.0404982	0.0337416	263.291	177.098	1.48669	up
229843_at	FAM82B	Family with sequence similarity 82, member B	0.0053784	0.0120511	111.213	74.8667	1.48548	up
209581_at	PLA2G16	phospholipase A2, group XVI	0.0017618	0.0076843	352.992	237.736	1.48481	up
215222_x_at	MACF1	microtubule-actin crosslinking factor 1	0.0269539	0.0265674	776.778	523.376	1.48417	up
202449_s_at	RXRA	retinoid X receptor, alpha	0.0187291	0.0217832	1233.57	831.823	1.48297	up
235751_s_at	VMO1	vitelline membrane outer layer 1 homolog (chicken)	0.0302932	0.028491	29.2792	19.7856	1.47982	up
228253_at	LOXL3	lysyl oxidase-like 3	0.0373615	0.0321051	241.051	163.173	1.47727	up
219885_at	SLFN12	schlafen family member 12	0.0328361	0.0298518	144.159	97.6808	1.47582	up
204620_s_at	VCAN	versican	0.0011067	0.00687112	7218.55	4891.65	1.47569	up
238909_at	S100A10	S100 calcium binding protein A10	0.0050192	0.0118348	1104.38	749.605	1.47328	up
208893_s_at	DUSP6	dual specificity phosphatase 6	0.0236083	0.0246377	2632.18	1787	1.47296	up
211245_x_at	KIR2DL4	killer cell immunoglobulin-like receptor, two domains, long cytoplasmic tail, 4	0.0117177	0.0171778	105.342	71.5353	1.47259	up
222876_s_at	ADAP2	ArfGAP with dual PH domains 2	0.0006755	0.00647675	256.981	174.585	1.47195	up
218568_at	AGK	acylglycerol kinase	0.0023487	0.00841672	240.905	163.766	1.47104	up
211429_s_at	SERPINA1	serpin peptidase inhibitor, clade A (alpha-1 antiproteinase, antitrypsin), membe	0.0063794	0.0130012	7517.7	5111.58	1.47072	up
212636_at	QKI	quaking homolog, KH domain RNA binding (mouse)	0.0164106	0.0202989	1159.12	788.487	1.47006	up
205141_at	ANG	angiogenin, ribonuclease, RNase A family, 5	0.0014577	0.0074389	94.1859	64.1182	1.46894	up
224553_s_at	TNFRSF18	tumor necrosis factor receptor superfamily, member 18	0.0002233	0.00484027	132.574	90.403	1.46648	up
203633_at	CPT1A	carnitine palmitoyltransferase 1A (liver)	0.0224123	0.0240578	1145.32	783.546	1.46172	up
203940_s_at	VASH1	vasohibin 1	0.0035828	0.010015	211.424	144.92	1.4589	up
205776_at	FMO5	flavin containing monooxygenase 5	0.0230449	0.0243805	93.848	64.5035	1.45493	up
209287_s_at	CDC42EP3	CDC42 effector protein (Rho GTPase binding) 3	0.0367671	0.0318997	355.775	244.625	1.45437	up
200885_at	RHOC	ras homolog gene family, member C	0.013644	0.0185226	901.271	619.904	1.45389	up
212859_x_at	MT1E	metallothionein 1E	0.0031101	0.00946482	485.757	334.111	1.45388	up
222887_s_at	TMEM127	transmembrane protein 127	0.012219	0.0174843	434.49	298.942	1.45343	up
241752_at	SLC8A1	solute carrier family 8 (sodium/calcium exchanger), member 1	0.0169977	0.020662	27.6426	19.0551	1.45067	up
210622_x_at	CDK10	cyclin-dependent kinase 10	0.0394287	0.0332036	215.588	148.684	1.44997	up
1554508_at	PIK3AP1	phosphoinositide-3-kinase adaptor protein 1	0.0147851	0.0194506	42.3775	29.2699	1.44782	up
228437_at	CNIH4	cornichon homolog 4 (Drosophila)	0.0123868	0.0175997	120.838	83.4845	1.44742	up
205708_s_at	TRPM2	transient receptor potential cation channel, subfamily M, member 2	0.0344363	0.0306511	213.822	148.179	1.443	up
233559_s_at	WDFY1	WD repeat and FYVE domain containing 1	0.0495933	0.0376634	64.5188	44.8327	1.4391	up
202816_s_at	SS18	synovial sarcoma translocation, chromosome 18	0.0083546	0.014739	167.576	116.455	1.43898	up
232183_at	SERAC1	serine active site containing 1	0.0052478	0.0119851	111.4	77.6479	1.43468	up
212025_s_at	FLII	flightless I homolog (Drosophila)	0.0452216	0.035689	550.106	383.849	1.43313	up
204222_s_at	GLIPR1	GLI pathogenesis-related 1	0.0145569	0.0192946	2058.21	1439.85	1.42946	up
201332_s_at	STAT6	signal transducer and activator of transcription 6, interleukin-4 induced	0.03303	0.0299131	320.37	224.327	1.42814	up
200742_s_at	TPP1	tripeptidyl peptidase I	0.0012047	0.00703322	971.213	680.506	1.42719	up
226722_at	FAM20C	family with sequence similarity 20, member C	0.0123617	0.0175997	167.138	117.203	1.42606	up
1568780_at	LOC649305	hypothetical LOC649305	0.0116413	0.0171592	306.419	214.915	1.42577	up
235451_at	SMAD5	SMAD family member 5	0.0068313	0.0133658	74.4088	52.2298	1.42464	up
244261_at	IL28RA	interleukin 28 receptor, alpha (interferon, lambda receptor)	0.0226416	0.0241642	174.884	122.795	1.4242	up
206057_x_at	SPN	sialophorin	0.0009348	0.00671187	423.04	297.133	1.42374	up
200678_x_at	GRN	granulin	0.0143992	0.0191748	4741.61	3332.73	1.42274	up
225847_at	NCEH1	neutral cholesterol ester hydrolase 1	0.0068247	0.0133658	80.1278	56.503	1.41812	up
218086_at	NPDC1	neural proliferation, differentiation and control, 1	0.0080652	0.0144809	209.322	148.352	1.41098	up
229625_at	GBP5	guanylate binding protein 5	0.0348928	0.0309629	1159.54	823.958	1.40728	up
238638_at	SLC37A2	solute carrier family 37 (glycerol-3-phosphate transporter), member 2	0.0071384	0.0135832	71.8675	51.0991	1.40643	up
206582_s_at	GPR56	G protein-coupled receptor 56	0.0008435	0.00658297	84.604	60.1773	1.40591	up
201940_at	CPD	carboxypeptidase D	0.0441859	0.0352731	370.998	264.087	1.40483	up
213006_at	CEBPD	CCAAT/enhancer binding protein (C/EBP), delta	0.0239512	0.0248831	210.476	150.277	1.40058	up
222613_at	C12orf4	chromosome 12 open reading frame 4	0.0434834	0.034904	146.897	104.918	1.40011	up
206058_at	SLC6A12	solute carrier family 6 (neurotransmitter transporter, betaine/GABA), member 12	0.0402968	0.0336258	41.3581	29.5752	1.3984	up
225798_at	JAZF1	JAZF zinc finger 1	0.0225158	0.0240889	641.648	460.062	1.3947	up
219017_at	ETNK1	ethanolamine kinase 1	0.0006113	0.006462	198.047	142.096	1.39375	up
204232_at	FCER1G	Fc fragment of IgE, high affinity I, receptor for; gamma polypeptide	0.0463757	0.0361932	6953.03	4993.45	1.39243	up
204510_at	CDC7	cell division cycle 7 homolog (S. cerevisiae)	0.0024002	0.00852203	213.939	153.782	1.39119	up
213839_at	CLMN	calmin (calponin-like, transmembrane)	0.009114	0.0151462	181.479	130.545	1.39016	up
204160_s_at	ENPP4	ectonucleotide pyrophosphatase/phosphodiesterase 4 (putative function)	0.0134008	0.018409	397.258	286.263	1.38774	up
214184_at	NPFF	neuropeptide FF-amide peptide precursor	0.0029951	0.00930498	147.037	106.041	1.38661	up
222750_s_at	SRD5A3	steroid 5 alpha-reductase 3	0.033189	0.0300206	148.927	107.473	1.38572	up
209607_x_at	SULT1A3 /// SULT1A4	sulfotransferase family, cytosolic, 1A, phenol-preferring, member 3 /// sulfotra	0.0063306	0.0129293	1267.49	914.865	1.38543	up
219620_x_at	C9orf167	chromosome 9 open reading frame 167	0.0355634	0.0313206	241.706	174.67	1.38379	up
212041_at	ATP6V0D1	ATPase, H+ transporting, lysosomal 38kDa, V0 subunit d1	0.0186382	0.0217401	3193.69	2310.02	1.38254	up
201120_s_at	PGRMC1	progesterone receptor membrane component 1	0.0128731	0.017952	194.405	140.732	1.38139	up
213716_s_at	SECTM1	secreted and transmembrane 1	0.0182453	0.0214678	694.724	503.045	1.38104	up
203870_at	USP46	ubiquitin specific peptidase 46	0.0096008	0.0156194	48.648	35.2302	1.38086	up
202874_s_at	ATP6V1C1	ATPase, H+ transporting, lysosomal 42kDa, V1 subunit C1	0.0204101	0.022748	367.262	266.134	1.37999	up
226372_at	CHST11	Carbohydrate (chondroitin 4) sulfotransferase 11	0.0299742	0.0283439	778.113	568.49	1.36874	up
1555896_a_at	ADAM15	ADAM metallopeptidase domain 15	0.026566	0.0263459	248.495	181.611	1.36828	up
206237_s_at	NRG1	neuregulin 1	0.0052822	0.0119851	120.074	87.886	1.36625	up
212671_s_at	HLA-DQA1 /// HLA-DQA2 /// LOC100294224 /// LOC100294317	major histocompatibility complex, class II, DQ alpha 1 /// major histocompatibil	0.0249171	0.025483	5611.48	4120.01	1.36201	up
203615_x_at	SULT1A1	sulfotransferase family, cytosolic, 1A, phenol-preferring, member 1	0.0341566	0.0305199	2044.11	1506.87	1.35653	up
1566472_s_at	RETSAT	retinol saturase (all-trans-retinol 13,14-reductase)	0.0164351	0.0202989	42.695	31.55	1.35325	up
209728_at	HLA-DRB4	major histocompatibility complex, class II, DR beta 4	0.0102524	0.016096	4427.55	3275.74	1.35162	up
219243_at	GIMAP4	GTPase, IMAP family member 4	0.0372397	0.0320515	2629.39	1948.04	1.34976	up
201935_s_at	EIF4G3	eukaryotic translation initiation factor 4 gamma, 3	0.0486656	0.0373666	268.106	198.811	1.34855	up
225400_at	TSEN15	tRNA splicing endonuclease 15 homolog (S. cerevisiae)	0.0327341	0.0298094	116.137	86.1855	1.34752	up
228325_at	KIAA0146	KIAA0146	0.0261527	0.026177	281.498	208.948	1.34722	up
203932_at	HLA-DMB	major histocompatibility complex, class II, DM beta	0.0279278	0.0271464	4430.78	3305.16	1.34056	up
201042_at	TGM2	transglutaminase 2 (C polypeptide, protein-glutamine-gamma-glutamyltransferase)	0.0135625	0.0185213	52.9035	39.4835	1.33989	up
223037_at	PDZD11	PDZ domain containing 11	0.0225839	0.0241458	610.511	455.829	1.33934	up
56256_at	SIDT2	SID1 transmembrane family, member 2	0.0091505	0.0151462	1693.9	1265.22	1.33882	up
211521_s_at	CYTH4	cytohesin 4	0.0406313	0.0337654	88.2619	65.9542	1.33823	up
201301_s_at	ANXA4	annexin A4	0.0058862	0.0125451	1353.19	1013.42	1.33527	up
226137_at	ZFHX3	zinc finger homeobox 3	0.0409342	0.0338603	194.819	146.21	1.33246	up
225943_at	NLN	neurolysin (metallopeptidase M3 family)	0.0029551	0.00922893	63.5529	47.7913	1.3298	up
227819_at	LGR6	leucine-rich repeat-containing G protein-coupled receptor 6	0.0118934	0.0173103	153.493	115.532	1.32857	up
203128_at	SPTLC2	serine palmitoyltransferase, long chain base subunit 2	0.033904	0.0303951	124.629	93.8458	1.32802	up
219629_at	FAM118A	family with sequence similarity 118, member A	0.0101561	0.0160835	90.5548	68.4742	1.32247	up
224247_s_at	MRPS10	mitochondrial ribosomal protein S10	0.0235375	0.0246325	156.186	118.116	1.32231	up
232636_at	SLITRK4	SLIT and NTRK-like family, member 4	0.029107	0.0277418	60.7237	45.9572	1.32131	up
203005_at	LTBR	lymphotoxin beta receptor (TNFR superfamily, member 3)	0.0433818	0.0348847	465.874	353.228	1.3189	up
202787_s_at	MAPKAPK3	mitogen-activated protein kinase-activated protein kinase 3	0.0186977	0.0217623	462.07	350.576	1.31803	up
221944_at	FLJ42627	hypothetical LOC645644	0.0182897	0.0214887	150.249	114.209	1.31556	up
209015_s_at	DNAJB6	DnaJ (Hsp40) homolog, subfamily B, member 6	0.0077488	0.0141505	310.638	236.657	1.31261	up
218746_at	TAPBPL	TAP binding protein-like	0.003084	0.00946482	675.615	516.313	1.30854	up
201137_s_at	HLA-DPB1	major histocompatibility complex, class II, DP beta 1	0.0121559	0.0174843	9398.69	7186.82	1.30777	up
209823_x_at	HLA-DQB1	major histocompatibility complex, class II, DQ beta 1	0.0472378	0.0366184	2281.94	1746.44	1.30662	up
1554245_x_at	ARL17 /// ARL17P1	ADP-ribosylation factor-like 17 /// ADP-ribosylation factor-like 17 pseudogene 1	0.0235455	0.0246325	91.3869	70.1399	1.30292	up
206540_at	GLB1L	galactosidase, beta 1-like	0.0031274	0.00947903	71.5912	54.955	1.30272	up
231236_at	ZFP57	zinc finger protein 57 homolog (mouse)	0.0077832	0.0141756	66.5741	51.3111	1.29746	up
1555895_at	DNM2	dynamin 2	0.0221938	0.0239346	136.842	105.596	1.2959	up
227166_at	DNAJC18	DnaJ (Hsp40) homolog, subfamily C, member 18	0.0364774	0.0317849	50.0756	39.183	1.27799	up
226435_at	PAPLN	papilin, proteoglycan-like sulfated glycoprotein	0.0427685	0.0346947	27.5888	21.633	1.27531	up
227027_at	GFPT1	glutamine-fructose-6-phosphate transaminase 1	0.0245128	0.0252232	87.5019	68.8809	1.27033	up
236988_x_at	ITGB2	integrin, beta 2 (complement component 3 receptor 3 and 4 subunit)	0.0470152	0.0364983	738.837	586.259	1.26026	up
214155_s_at	LARP4	La ribonucleoprotein domain family, member 4	0.0375385	0.03224	28.8589	23.1766	1.24517	up
226002_at	GAB1	GRB2-associated binding protein 1	0.0479916	0.0369544	41.1056	33.1038	1.24172	up
229568_at	MOBKL2B	MOB1, Mps One Binder kinase activator-like 2B (yeast)	0.0309612	0.0288287	45.4096	36.6363	1.23947	up
230813_at	LEPREL1	leprecan-like 1	0.010665	0.016435	34.7557	28.0729	1.23805	up
222412_s_at	SSR3	signal sequence receptor, gamma (translocon-associated protein gamma)	0.0190549	0.0219097	202.603	165.412	1.22484	up
226578_s_at	DUSP1	Dual specificity phosphatase 1	0.0349016	0.0309629	93.7413	76.6168	1.22351	up
203329_at	PTPRM	protein tyrosine phosphatase, receptor type, M	0.0494689	0.0376374	82.0623	67.0852	1.22326	up
221690_s_at	NLRP2	NLR family, pyrin domain containing 2	0.0442992	0.0353185	109.561	90.3181	1.21306	up
234977_at	ZADH2	zinc binding alcohol dehydrogenase domain containing 2	0.038563	0.0328113	52.6552	43.5283	1.20968	up
1561571_at	LOC730139	hypothetical protein LOC730139	0.0284083	0.0274483	42.3177	35.5727	1.18961	up
225271_at	TMEM63B	transmembrane protein 63B	0.0149164	0.0194963	162.931	138.339	1.17777	up
221614_s_at	RPH3AL	rabphilin 3A-like (without C2 domains)	0.0441552	0.0352731	43.9265	37.5999	1.16826	up

## Sheet: IF down
genes downregulated specifically by HSCT in IF group
probe set ID	Gene Symbol	Gene name(Description)	p-value	FDR	Geometric mean of intensities : T	Geometric mean of intensities : D	Fold change(T/D)	up/down
1559038_at	2.Sep	septin 2	0.0220891	0.0238695	51.7338	74.1176	0.697996	down
213256_at	3.Mar	membrane-associated ring finger (C3HC4) 3	0.0066322	0.013195	59.0767	97.1448	0.608131	down
232371_at	7.Mar	Membrane-associated ring finger (C3HC4) 7	0.0080763	0.0144809	71.3038	123.369	0.57797	down
205435_s_at	AAK1	AP2 associated kinase 1	0.0030462	0.00944555	41.7944	72.7755	0.574292	down
213353_at	ABCA5	ATP-binding cassette, sub-family A (ABC1), member 5	0.0015088	0.00750862	228.608	343.667	0.665201	down
204567_s_at	ABCG1	ATP-binding cassette, sub-family G (WHITE), member 1	0.0024275	0.0085625	82.6356	124.166	0.665526	down
210461_s_at	ABLIM1	actin binding LIM protein 1	0.0421566	0.034483	85.4427	133.563	0.63972	down
43427_at	ACACB	acetyl-Coenzyme A carboxylase beta	0.0008294	0.00658297	73.3811	126.576	0.579742	down
218795_at	ACP6	acid phosphatase 6, lysophosphatidic	0.031885	0.0293875	244.024	362.641	0.672908	down
226925_at	ACPL2	acid phosphatase-like 2	0.0234663	0.0246008	284.841	398.473	0.714832	down
208636_at	ACTN1	actinin, alpha 1	0.0070055	0.0135612	1632.4	3040.21	0.536936	down
1563182_at	ACVR1C	activin A receptor, type IC	0.0033484	0.0097806	15.425	28.7061	0.537344	down
236126_at	ACVR2B	activin A receptor, type IIB	0.0102126	0.016096	80.5272	131.171	0.613911	down
1558142_at	ADSL /// TNRC6B	adenylosuccinate lyase /// trinucleotide repeat containing 6B	0.0046668	0.0113937	656.381	989.378	0.663427	down
232865_at	AFF4	AF4/FMR2 family, member 4	0.0247312	0.0253832	285.282	428.356	0.665993	down
220390_at	AGBL2	ATP/GTP binding protein-like 2	0.0189141	0.021898	25.275	38.2258	0.661201	down
226115_at	AHCTF1	AT hook containing transcription factor 1	0.0001244	0.00381138	111.767	164.397	0.679859	down
223136_at	AIG1	androgen-induced 1	0.0062307	0.0128573	56.5375	121.911	0.463761	down
242876_at	AKT3	V-akt murine thymoma viral oncogene homolog 3 (protein kinase B, gamma)	0.0047947	0.0115478	37.6825	83.4935	0.451322	down
220148_at	ALDH8A1	aldehyde dehydrogenase 8 family, member A1	0.0282498	0.0273443	26.0952	34.254	0.761813	down
229887_at	ALS2CL	ALS2 C-terminal like	0.0178229	0.0211386	39.6898	63.4058	0.625964	down
202203_s_at	AMFR	autocrine motility factor receptor	0.0089269	0.0151444	247.449	299.332	0.826671	down
226258_at	AMN1	antagonist of mitotic exit network 1 homolog (S. cerevisiae)	0.0007746	0.00647675	111.08	171.284	0.648514	down
208498_s_at	AMY1A /// AMY1B /// AMY1C /// AMY2A /// AMY2B	amylase, alpha 1A (salivary) /// amylase, alpha 1B (salivary) /// amylase, alpha	0.0052085	0.0119851	240.096	375.605	0.639223	down
209442_x_at	ANK3	ankyrin 3, node of Ranvier (ankyrin G)	0.0185705	0.0216924	57.0856	105.658	0.540285	down
229176_at	ANKH	ankylosis, progressive homolog (mouse)	0.0058706	0.0125411	35.4278	53.0955	0.667247	down
229307_at	ANKRD28	ankyrin repeat domain 28	0.01038	0.0162112	41.5378	52.7264	0.787799	down
235778_s_at	ANKRD44	ankyrin repeat domain 44	0.0478228	0.0368583	63.0347	87.6579	0.7191	down
1569053_at	AP3M2	adaptor-related protein complex 3, mu 2 subunit	0.0189683	0.021898	79.3852	161.541	0.491423	down
202652_at	APBB1	amyloid beta (A4) precursor protein-binding, family B, member 1 (Fe65)	0.0137934	0.018694	55.5937	93.7131	0.593234	down
203747_at	AQP3	aquaporin 3 (Gill blood group)	0.0278665	0.0271358	189.911	270.395	0.702345	down
233849_s_at	ARHGAP5	Rho GTPase activating protein 5	0.0029464	0.00922893	41.4786	81.1091	0.511393	down
203404_at	ARMCX2	armadillo repeat containing, X-linked 2	0.0015877	0.00763373	31.5397	70.3353	0.448419	down
227444_at	ARMCX4	Armadillo repeat containing, X-linked 4	0.0089344	0.0151444	19.1101	31.5782	0.605167	down
219335_at	ARMCX5	armadillo repeat containing, X-linked 5	0.0377471	0.0323847	145.995	191.994	0.760412	down
224797_at	ARRDC3	arrestin domain containing 3	8.07e-05	0.00365015	276.256	504.752	0.547309	down
222667_s_at	ASH1L	ash1 (absent, small, or homeotic)-like (Drosophila)	0.0354933	0.0312988	835.842	1347.45	0.620314	down
242439_s_at	ASXL1	additional sex combs like 1 (Drosophila)	0.0305266	0.0285888	148.845	230.945	0.644504	down
228381_at	ATF7IP2	Activating transcription factor 7 interacting protein 2	0.0426613	0.0346924	532.93	840.2	0.634289	down
205197_s_at	ATP7A	ATPase, Cu++ transporting, alpha polypeptide	0.0141371	0.0189846	57.3899	82.0885	0.699122	down
204516_at	ATXN7	ataxin 7	0.0278907	0.027143	741.993	1167.6	0.635488	down
222446_s_at	BACE2	beta-site APP-cleaving enzyme 2	0.0017127	0.0076843	46.6695	88.4499	0.527638	down
209406_at	BAG2	BCL2-associated athanogene 2	0.01483	0.0194506	49.4231	70.8264	0.697806	down
217911_s_at	BAG3	BCL2-associated athanogene 3	0.0022116	0.00827463	98.4304	227.857	0.431983	down
214052_x_at	BAT2D1	BAT2 domain containing 1	0.036959	0.0319474	36.2328	56.2732	0.643873	down
210653_s_at	BCKDHB	branched chain keto acid dehydrogenase E1, beta polypeptide	0.0253627	0.0257271	86.4014	129.013	0.669711	down
1557257_at	BCL10	B-cell CLL/lymphoma 10	0.0101947	0.0160835	246.934	385.137	0.641158	down
219497_s_at	BCL11A	B-cell CLL/lymphoma 11A (zinc finger protein)	0.0253002	0.0256898	257.247	300.905	0.85491	down
203684_s_at	BCL2	B-cell CLL/lymphoma 2	0.006566	0.0131405	52.4319	82.7423	0.633677	down
223915_at	BCOR	BCL6 co-repressor	0.0052817	0.0119851	55.5664	90.8256	0.611793	down
219670_at	BEND5	BEN domain containing 5	0.0268688	0.0265483	46.8373	70.1363	0.667803	down
215440_s_at	BEX4	brain expressed, X-linked 4	0.0021743	0.00825043	355.02	611.644	0.580436	down
210538_s_at	BIRC3	baculoviral IAP repeat-containing 3	0.005995	0.0126281	586.068	802.482	0.730319	down
201849_at	BNIP3	BCL2/adenovirus E1B 19kDa interacting protein 3	0.025784	0.0259689	239.504	398.401	0.601164	down
200920_s_at	BTG1	B-cell translocation gene 1, anti-proliferative	0.0222656	0.02398	5574.63	8645.43	0.644807	down
201236_s_at	BTG2	BTG family, member 2	0.0101498	0.0160835	1382.94	2374.41	0.582433	down
236226_at	BTLA	B and T lymphocyte associated	0.0249635	0.0255082	109.606	167.911	0.65276	down
228434_at	BTNL9	butyrophilin-like 9	0.0107158	0.0164401	22.2762	41.5275	0.53642	down
229145_at	C10orf104	chromosome 10 open reading frame 104	0.0420488	0.0344297	1383.58	1847.84	0.748755	down
226313_at	C10orf35	chromosome 10 open reading frame 35	0.0003235	0.0051382	60.5746	130.378	0.464608	down
228155_at	C10orf58	chromosome 10 open reading frame 58	0.0013844	0.00741845	125.548	200.667	0.625653	down
222785_x_at	C11orf1	chromosome 11 open reading frame 1	0.0252303	0.0256548	241.573	384.984	0.627489	down
220987_s_at	C11orf17 /// NUAK2	chromosome 11 open reading frame 17 /// NUAK family, SNF1-like kinase, 2	0.0158625	0.0199874	526.189	772.396	0.681243	down
204521_at	C12orf24	chromosome 12 open reading frame 24	0.0135869	0.0185226	118.804	158.403	0.75001	down
1561378_at	C12orf42	chromosome 12 open reading frame 42	0.0454264	0.0357285	39.8775	49.7047	0.802288	down
237460_x_at	C14orf182	chromosome 14 open reading frame 182	0.0429273	0.0347092	49.2766	73.0339	0.674708	down
1564211_at	C14orf64	chromosome 14 open reading frame 64	0.0015007	0.00750862	17.6265	42.8899	0.410971	down
219442_at	C16orf67	chromosome 16 open reading frame 67	0.0443514	0.0353302	254.312	421.533	0.603303	down
220606_s_at	C17orf48	chromosome 17 open reading frame 48	0.0004507	0.0055012	195.494	375.85	0.520138	down
242520_s_at	C1orf228	chromosome 1 open reading frame 228	0.0002631	0.00497277	144.838	259.657	0.557807	down
241908_at	C1orf58	Chromosome 1 open reading frame 58	0.0180621	0.0212988	82.6716	104.916	0.787978	down
209020_at	C20orf111	chromosome 20 open reading frame 111	0.0070545	0.0135612	587.342	930.075	0.6315	down
229899_s_at	C20orf199	chromosome 20 open reading frame 199	0.0079374	0.0143272	167.688	317.649	0.527903	down
226204_at	C22orf29	chromosome 22 open reading frame 29	0.0172537	0.0208416	186.577	256.72	0.726772	down
226815_at	C3orf31	chromosome 3 open reading frame 31	0.0447479	0.0354538	78.0516	106.459	0.733163	down
225698_at	C5orf26	chromosome 5 open reading frame 26	0.0495674	0.0376634	1378.38	2108.77	0.653643	down
238635_at	C5orf28	chromosome 5 open reading frame 28	0.0265962	0.0263596	11.9396	27.318	0.437059	down
225956_at	C5orf41	chromosome 5 open reading frame 41	0.0351142	0.0310663	262.789	387.474	0.678211	down
229070_at	C6orf105	chromosome 6 open reading frame 105	0.0166923	0.0204671	32.6828	100.371	0.325619	down
238860_at	C6orf130	chromosome 6 open reading frame 130	0.0279095	0.027145	168.833	209.718	0.805046	down
213312_at	C6orf162	chromosome 6 open reading frame 162	0.0073158	0.0136977	107.005	164.67	0.649818	down
220755_s_at	C6orf48	chromosome 6 open reading frame 48	0.0059035	0.0125488	2025.05	2894.21	0.69969	down
215024_at	C7orf28B	chromosome 7 open reading frame 28B	0.0324482	0.0296406	149.835	215.128	0.696492	down
243264_s_at	C8orf44 /// SGK3	chromosome 8 open reading frame 44 /// serum/glucocorticoid regulated kinase fam	0.0021676	0.00825043	72.2041	92.3902	0.781512	down
1555241_at	C8orf59	chromosome 8 open reading frame 59	0.0103761	0.0162112	121.863	147.799	0.824521	down
224860_at	C9orf123	chromosome 9 open reading frame 123	0.0231604	0.0244547	60.5956	95.279	0.635981	down
225627_s_at	CACHD1	cache domain containing 1	0.0025438	0.00874362	12.6651	35.9342	0.352452	down
210349_at	CAMK4	calcium/calmodulin-dependent protein kinase IV	0.025575	0.0258552	83.7181	151.207	0.553664	down
212765_at	CAMSAP1L1	calmodulin regulated spectrin-associated protein 1-like 1	0.001823	0.00781365	56.4833	82.1947	0.68719	down
203356_at	CAPN7	calpain 7	0.0488319	0.0374231	320.505	392.348	0.816889	down
205379_at	CBR3	carbonyl reductase 3	0.0045763	0.0113711	93.2745	157.728	0.591361	down
209715_at	CBX5	chromobox homolog 5 (HP1 alpha homolog, Drosophila)	0.0305595	0.0285999	86.3865	119.759	0.721339	down
212914_at	CBX7	chromobox homolog 7	0.0090684	0.0151462	777.085	1078.05	0.720825	down
224968_at	CCDC104	coiled-coil domain containing 104	0.0378652	0.0324344	194.748	324.786	0.599619	down
1553645_at	CCDC141	coiled-coil domain containing 141	0.0258151	0.025984	15.4918	24.4857	0.632689	down
228693_at	CCDC50	coiled-coil domain containing 50	0.0337081	0.0302965	58.1881	84.8814	0.685523	down
235244_at	CCDC58	coiled-coil domain containing 58	0.0494617	0.0376374	86.0434	120.837	0.712061	down
218936_s_at	CCDC59	coiled-coil domain containing 59	0.0332679	0.0300415	748.244	1099.95	0.68025	down
1560177_at	CCDC66	coiled-coil domain containing 66	0.0166401	0.0204426	19.9914	32.0824	0.623126	down
243282_at	CCDC93	coiled-coil domain containing 93	0.0495026	0.0376374	78.5802	113.564	0.691944	down
224027_at	CCL28	chemokine (C-C motif) ligand 28	0.006849	0.0133658	39.4207	82.6821	0.476774	down
1562028_at	CCND3	Cyclin D3	0.0029323	0.00922893	67.2389	116.266	0.578319	down
206967_at	CCNT1	cyclin T1	0.0015032	0.00750862	63.2539	106.619	0.593268	down
206983_at	CCR6	chemokine (C-C motif) receptor 6	0.0072532	0.0136977	124.59	166.434	0.748585	down
219025_at	CD248	CD248 molecule, endosialin	0.0051186	0.0119309	105.961	202.538	0.523164	down
206545_at	CD28	CD28 molecule	0.0369033	0.0319474	202.688	352.249	0.57541	down
205288_at	CDC14A	CDC14 cell division cycle 14 homolog A (S. cerevisiae)	0.011672	0.0171732	57.6065	88.295	0.652432	down
219343_at	CDC37L1	cell division cycle 37 homolog (S. cerevisiae)-like 1	0.0299055	0.0283191	235.182	321.537	0.73143	down
1552613_s_at	CDC42SE2	CDC42 small effector 2	0.0161668	0.0201213	307.732	423.591	0.726484	down
225081_s_at	CDCA7L	cell division cycle associated 7-like	0.0379959	0.0324946	308.433	577.49	0.534093	down
204995_at	CDK5R1	cyclin-dependent kinase 5, regulatory subunit 1 (p35)	0.0003155	0.0051382	89.5101	212.192	0.421835	down
41660_at	CELSR1	cadherin, EGF LAG seven-pass G-type receptor 1 (flamingo homolog, Drosophila)	0.0280164	0.0272162	48.1561	61.4264	0.783964	down
222848_at	CENPK	centromere protein K	0.0453354	0.035713	122.802	196.588	0.624667	down
226611_s_at	CENPV	centromere protein V	0.0086676	0.014992	88.2865	148.642	0.593954	down
212675_s_at	CEP68	centrosomal protein 68kDa	0.0010881	0.00683645	483.377	902.706	0.535475	down
225951_s_at	CHD2	Chromodomain helicase DNA binding protein 2	0.0072521	0.0136977	3987.8	5722.86	0.696819	down
200810_s_at	CIRBP	cold inducible RNA binding protein	0.0389836	0.0329555	3017.96	3912.45	0.771375	down
214252_s_at	CLN5	ceroid-lipofuscinosis, neuronal 5	0.0017899	0.00777307	192.699	335.542	0.574292	down
204576_s_at	CLUAP1	clusterin associated protein 1	0.0233481	0.0245339	109.976	172.819	0.636362	down
235099_at	CMTM8	CKLF-like MARVEL transmembrane domain containing 8	0.0010303	0.006794	33.7105	62.4515	0.539788	down
205229_s_at	COCH	coagulation factor C homolog, cochlin (Limulus polyphemus)	0.0235759	0.0246325	41.789	81.5196	0.512625	down
209081_s_at	COL18A1	collagen, type XVIII, alpha 1	0.0095515	0.0156021	148.495	300.233	0.4946	down
222073_at	COL4A3	collagen, type IV, alpha 3 (Goodpasture antigen)	0.0046174	0.0113711	13.7688	35.6928	0.38576	down
213428_s_at	COL6A1	collagen, type VI, alpha 1	0.0002676	0.00497277	35.5086	61.6998	0.575505	down
202118_s_at	CPNE3	copine III	0.0307258	0.0287254	21.8795	30.2163	0.724096	down
226934_at	CPSF6	cleavage and polyadenylation specific factor 6, 68kDa	0.0180509	0.0212988	557.898	812.255	0.686851	down
204313_s_at	CREB1	cAMP responsive element binding protein 1	0.0034941	0.00991538	289.112	389.384	0.742484	down
222819_at	CTPS2	CTP synthase II	0.0088046	0.0150918	64.2567	81.5899	0.787557	down
215997_s_at	CUL4B	cullin 4B	0.0238638	0.0248519	67.3763	90.013	0.748518	down
206126_at	CXCR5	chemokine (C-X-C motif) receptor 5	0.0308492	0.0287742	93.6473	131.609	0.711558	down
227520_at	CXorf15	chromosome X open reading frame 15	0.007016	0.0135612	407.657	523.039	0.779402	down
244546_at	CYCS	cytochrome c, somatic	0.0453491	0.035713	46.1642	74.8834	0.61648	down
39582_at	CYLD	cylindromatosis (turban tumor syndrome)	0.0228573	0.0242774	814.563	1158.37	0.703199	down
209570_s_at	D4S234E	DNA segment on chromosome 4 (unique) 234 expressed sequence	0.0194789	0.0221763	150.937	271.43	0.556082	down
219179_at	DACT1	dapper, antagonist of beta-catenin, homolog 1 (Xenopus laevis)	0.0362464	0.0316519	28.318	51.4145	0.550778	down
202806_at	DBN1	drebrin 1	0.0034516	0.00990877	59.4828	94.0596	0.632395	down
209383_at	DDIT3 /// NR1H3	DNA-damage-inducible transcript 3 /// nuclear receptor subfamily 1, group H, mem	0.0071371	0.0135832	430.81	718.615	0.5995	down
202887_s_at	DDIT4	DNA-damage-inducible transcript 4	0.0290901	0.0277418	560.267	1197.89	0.467711	down
232816_s_at	DDX11	DEAD/H (Asp-Glu-Ala-Asp/His) box polypeptide 11 (CHL1-like helicase homolog, S.	0.0253947	0.0257372	30.3265	38.8704	0.780195	down
1568815_a_at	DDX50	DEAD (Asp-Glu-Ala-Asp) box polypeptide 50	0.0371686	0.0320377	202.484	286.623	0.706447	down
216260_at	DICER1	dicer 1, ribonuclease type III	0.0159068	0.019998	33.6401	50.6704	0.6639	down
212503_s_at	DIP2C	DIP2 disco-interacting protein 2 homolog C (Drosophila)	0.0018899	0.00788922	22.7453	40.5987	0.560247	down
1553998_at	DMRTC1 /// DMRTC1B	DMRT-like family C1 /// DMRT-like family C1B	0.0046613	0.0113937	40.8115	72.9164	0.559703	down
202843_at	DNAJB9	DnaJ (Hsp40) homolog, subfamily B, member 9	0.0188644	0.0218619	90.1692	166.594	0.541253	down
223504_at	DNAJC27	DnaJ (Hsp40) homolog, subfamily C, member 27	0.0177577	0.0211098	50.9006	69.7527	0.729729	down
224060_s_at	DPH5	DPH5 homolog (S. cerevisiae)	0.0182251	0.0214597	245.701	363.199	0.676492	down
226721_at	DPY19L4	dpy-19-like 4 (C. elegans)	0.0387001	0.0328534	77.5316	104.43	0.742427	down
232235_at	DSEL	dermatan sulfate epimerase-like	0.0239277	0.0248747	11.7	23.5503	0.496807	down
224832_at	DUSP16	dual specificity phosphatase 16	0.0209395	0.0231539	250.414	392.289	0.63834	down
239017_at	DVWA	dual von Willebrand factor A domains	0.0248489	0.0254394	49.2129	88.5447	0.555797	down
229106_at	DYNLL2	dynein, light chain, LC8-type 2	0.0408558	0.0338475	258.435	372.825	0.693181	down
207231_at	DZIP3	DAZ interacting protein 3, zinc finger	0.033242	0.0300349	49.8955	72.0398	0.692609	down
223306_at	EBPL	emopamil binding protein-like	0.0065726	0.0131405	581.528	730.435	0.796139	down
238458_at	EFHA2	EF-hand domain family, member A2	0.004211	0.0109901	10.958	23.1983	0.47236	down
227404_s_at	EGR1	Early growth response 1	0.0087486	0.0150546	491.538	1445.62	0.340019	down
201017_at	EIF1AX	eukaryotic translation initiation factor 1A, X-linked	0.0050664	0.0118792	168.004	257.93	0.651358	down
204211_x_at	EIF2AK2	eukaryotic translation initiation factor 2-alpha kinase 2	0.042903	0.0347092	237.924	300.523	0.7917	down
208707_at	EIF5	eukaryotic translation initiation factor 5	0.0112081	0.0168708	278.911	400.378	0.696619	down
228674_s_at	EML4	echinoderm microtubule associated protein like 4	0.0109924	0.0166864	564.285	969.193	0.582222	down
204142_at	ENOSF1	enolase superfamily member 1	0.0198476	0.0224536	328.305	459.611	0.714312	down
202221_s_at	EP300	E1A binding protein p300	0.0430428	0.0347331	184.374	211.684	0.870989	down
227449_at	EPHA4	EPH receptor A4	0.0325681	0.0297085	71.8773	106.581	0.674393	down
204718_at	EPHB6	EPH receptor B6	0.0099808	0.0159672	137.97	205.142	0.672557	down
232164_s_at	EPPK1	epiplakin 1	0.0007988	0.0065172	20.0314	51.1987	0.391248	down
224698_at	ESYT2	extended synaptotagmin-like protein 2	0.0283083	0.0273699	1328.92	1763.71	0.753481	down
230792_at	FAAH2	fatty acid amide hydrolase 2	0.0012693	0.00717248	50.519	82.3564	0.61342	down
224783_at	FAM100B	family with sequence similarity 100, member B	0.0064351	0.0130491	1015.34	1518.93	0.668459	down
1555485_s_at	FAM153B	family with sequence similarity 153, member B	0.0035932	0.0100178	24.0934	57.0977	0.421968	down
242584_at	FAM161A	family with sequence similarity 161, member A	0.0096369	0.0156624	28.1021	42.0095	0.668946	down
228239_at	FAM165B	family with sequence similarity 165, member B	0.0158106	0.0199547	120.381	161.945	0.743344	down
213954_at	FAM169A	family with sequence similarity 169, member A	0.0342946	0.0305753	16.8137	30.5536	0.550303	down
230923_at	FAM19A1	family with sequence similarity 19 (chemokine (C-C motif)-like), member A1	0.0057288	0.0124394	18.8088	38.8167	0.484555	down
236316_at	FAM3C	family with sequence similarity 3, member C	0.0403824	0.0336798	28.965	46.6212	0.621285	down
216682_s_at	FAM48A	Family with sequence similarity 48, member A	0.0057881	0.0124835	48.733	84.8362	0.574436	down
223038_s_at	FAM60A /// LOC728115	family with sequence similarity 60, member A /// similar to family with sequence	0.0289692	0.0276758	76.5379	113.298	0.675546	down
211623_s_at	FBL	fibrillarin	0.0362721	0.0316572	2627.17	3441.98	0.763274	down
203088_at	FBLN5	fibulin 5	6.28e-05	0.00338178	69.4979	219.596	0.31648	down
229247_at	FBLN7	fibulin 7	0.0006252	0.006462	29.3462	63.3871	0.462967	down
232412_at	FBXL20	F-box and leucine-rich repeat protein 20	0.0099621	0.015966	13.8034	20.6385	0.668819	down
232693_s_at	FBXO16 /// ZNF395	F-box protein 16 /// zinc finger protein 395	0.0089344	0.0151444	161.148	247.52	0.651051	down
226970_at	FBXO33	F-box protein 33	0.0478258	0.0368583	556.473	864.236	0.64389	down
241954_at	FDFT1	Farnesyl-diphosphate farnesyltransferase 1	0.0018709	0.007836	144.923	230.085	0.629869	down
236808_at	FGFR1OP2	FGFR1 oncogene partner 2	0.0429264	0.0347092	30.6629	49.2426	0.622691	down
219390_at	FKBP14	FK506 binding protein 14, 22 kDa	0.048049	0.036981	34.8042	43.2073	0.805518	down
205510_s_at	FLJ10038	hypothetical protein FLJ10038	0.0092951	0.0153071	171.644	247.277	0.694138	down
232664_at	FLJ12334	hypothetical gene supported by AK022396; AK097927	0.0095188	0.0155644	61.7914	102.508	0.602796	down
219871_at	FLJ13197	hypothetical FLJ13197	0.0485926	0.0373283	20.8686	32.5939	0.64026	down
1556474_a_at	FLJ38379	hypothetical FLJ38379	0.0125505	0.0176461	16.4927	32.4246	0.508646	down
1559964_at	FLJ38717	FLJ38717 protein	0.0447078	0.0354394	149.562	187.861	0.796132	down
1569040_s_at	FLJ40330	hypothetical LOC645784	0.018992	0.021898	33.1843	68.8642	0.481879	down
229246_at	FLJ44342	hypothetical LOC645460	0.0393418	0.0331716	99.3606	122.845	0.808827	down
211074_at	FOLR1	folate receptor 1 (adult)	0.0116339	0.0171592	443.331	590.734	0.750475	down
202724_s_at	FOXO1	forkhead box O1	0.0018329	0.00781365	390.685	636.498	0.613803	down
224837_at	FOXP1	forkhead box P1	0.0017315	0.0076843	1753.3	2776.7	0.631435	down
239193_at	FUBP3	far upstream element (FUSE) binding protein 3	0.0319517	0.0294119	45.6563	61.5197	0.742142	down
220131_at	FXYD7	FXYD domain containing ion transport regulator 7	0.0115815	0.0171023	32.6185	55.563	0.587053	down
224148_at	FYB	FYN binding protein (FYB-120/130)	0.0048992	0.0117081	21.7533	33.4332	0.650651	down
219815_at	GAL3ST4	galactose-3-O-sulfotransferase 4	0.0005883	0.00633815	83.5354	157.563	0.530171	down
224841_x_at	GAS5	growth arrest-specific 5 (non-protein coding)	0.0104545	0.0162371	2936.05	4356.55	0.673938	down
235310_at	GCET2	germinal center expressed transcript 2	0.0012101	0.00703322	19.5559	29.8229	0.655734	down
213129_s_at	GCSH	glycine cleavage system protein H (aminomethyl carrier)	0.0345605	0.0307448	89.2203	112.029	0.796404	down
1554670_at	GGA1	golgi associated, gamma adaptin ear containing, ARF binding protein 1	0.0438349	0.0351092	63.6215	83.255	0.764177	down
226469_s_at	GGT7	gamma-glutamyltransferase 7	0.0023582	0.00842847	54.4645	83.6019	0.651475	down
234192_s_at	GKAP1	G kinase anchoring protein 1	0.0006258	0.006462	96.6885	148.594	0.650691	down
204000_at	GNB5	guanine nucleotide binding protein (G protein), beta 5	0.0425809	0.0346721	297.698	370.489	0.803527	down
228857_at	GNL1 /// LOC285831	guanine nucleotide binding protein-like 1 /// hypothetical protein LOC285831	0.0300935	0.0284138	90.3274	128.378	0.703604	down
233198_at	GOLGA2L1	golgi autoantigen, golgin subfamily a, 2-like 1	0.0078416	0.0142179	111.587	173.558	0.642934	down
215203_at	GOLGA4	golgi autoantigen, golgin subfamily a, 4	0.0472325	0.0366184	89.0184	115.144	0.773108	down
227215_at	GOPC	golgi associated PDZ and coiled-coil motif containing	0.0323823	0.0296227	81.5825	108.359	0.75289	down
243880_at	GOSR2	golgi SNAP receptor complex member 2	0.0179754	0.021243	43.4833	64.5272	0.673875	down
207926_at	GP5	glycoprotein V (platelet)	0.0051857	0.0119625	27.9408	46.1452	0.605497	down
239533_at	GPR155	G protein-coupled receptor 155	0.0467977	0.0364469	106.977	145.525	0.735107	down
205419_at	GPR183	G protein-coupled receptor 183	0.0028562	0.00915045	677.648	1397.73	0.48482	down
228027_at	GPRASP2	G protein-coupled receptor associated sorting protein 2	0.0006268	0.006462	29.1297	64.9278	0.448647	down
213170_at	GPX7	glutathione peroxidase 7	0.0169061	0.0206127	210.513	271.596	0.775095	down
244808_at	GRAMD1A	GRAM domain containing 1A	0.001735	0.0076843	124.874	219.464	0.568996	down
219313_at	GRAMD1C	GRAM domain containing 1C	0.0049449	0.0117651	13.5967	19.9414	0.681834	down
226881_at	GRPEL2	GrpE-like 2, mitochondrial (E. coli)	0.0169658	0.020662	206.126	276.899	0.744407	down
225276_at	GSPT1	G1 to S phase transition 1	0.02873	0.0275777	402.913	525.899	0.766141	down
235867_at	GSTM3	glutathione S-transferase mu 3 (brain)	0.0140292	0.0189026	26.6169	46.5436	0.571871	down
203815_at	GSTT1	glutathione S-transferase theta 1	0.0175285	0.0209797	48.0832	58.6681	0.819579	down
211998_at	H3F3B	H3 histone, family 3B (H3.3B)	0.0283102	0.0273699	1408.47	1941.92	0.725294	down
233919_s_at	HABP4	hyaluronan binding protein 4	0.0156516	0.0198315	102.747	177.406	0.579165	down
1557098_s_at	HAR1A	highly accelerated region 1A (non-protein coding)	0.0159965	0.0200281	54.2691	93.9141	0.577859	down
210054_at	HAUS3	HAUS augmin-like complex, subunit 3	0.0071242	0.0135832	486.827	742.691	0.65549	down
244865_at	HAX1	HCLS1 associated protein X-1	0.0004708	0.00566137	139.569	233.191	0.598519	down
209315_at	HBS1L	HBS1-like (S. cerevisiae)	0.0394415	0.0332036	120.247	162.19	0.741395	down
215349_at	hCG_1730474	Hypothetical protein LOC643376	0.0286929	0.0275749	72.8229	97.782	0.744748	down
1554290_at	HERC3	hect domain and RLD 3	0.0056873	0.0123825	27.4541	46.5235	0.590113	down
219028_at	HIPK2	homeodomain interacting protein kinase 2	0.0387376	0.0328679	74.2833	96.962	0.766107	down
204512_at	HIVEP1	human immunodeficiency virus type I enhancer binding protein 1	0.0035	0.00991538	159.95	256.658	0.623201	down
200943_at	HMGN1	high-mobility group nucleosome binding domain 1	0.0054557	0.01214	3381.45	4482.71	0.754332	down
1554251_at	HP1BP3	heterochromatin protein 1, binding protein 3	0.0263703	0.026297	183.553	239.346	0.766894	down
219671_at	HPCAL4	hippocalcin like 4	0.0053068	0.0119942	16.8333	36.2421	0.464468	down
209657_s_at	HSF2	heat shock transcription factor 2	0.0282045	0.0273171	180.198	340.129	0.529793	down
230718_at	HSF5	heat shock transcription factor family member 5	0.0424635	0.0346114	25.0654	38.7973	0.646061	down
201841_s_at	HSPB1	heat shock 27kDa protein 1	0.0054242	0.0121033	206.845	306.665	0.674498	down
207826_s_at	ID3	inhibitor of DNA binding 3, dominant negative helix-loop-helix protein	1.71e-05	0.0029079	66.7238	150.189	0.444265	down
203596_s_at	IFIT5	interferon-induced protein with tetratricopeptide repeats 5	0.0078673	0.0142441	237.517	342.08	0.69433	down
202147_s_at	IFRD1	interferon-related developmental regulator 1	0.0180289	0.0212907	265.171	419.192	0.632576	down
218100_s_at	IFT57	intraflagellar transport 57 homolog (Chlamydomonas)	0.0014566	0.0074389	338.607	545.84	0.620343	down
203627_at	IGF1R	insulin-like growth factor 1 receptor	0.0003551	0.0051958	54.5127	96.3246	0.565927	down
228518_at	IGH@ /// IGHG1 /// IGHM	immunoglobulin heavy locus /// immunoglobulin heavy constant gamma 1 (G1m marker	0.006511	0.013122	148.727	362.592	0.410178	down
215118_s_at	IGHG1	Immunoglobulin heavy constant gamma 1 (G1m marker)	0.007285	0.0136977	225.377	507.967	0.443685	down
215777_at	IGLV4-60	immunoglobulin lambda variable 4-60	0.0421116	0.0344637	128.046	187.793	0.681845	down
226680_at	IKZF5	IKAROS family zinc finger 5 (Pegasus)	0.0202857	0.0226829	135.814	202.493	0.670708	down
204773_at	IL11RA	interleukin 11 receptor, alpha	0.0296238	0.0281183	317.187	463.53	0.684287	down
208200_at	IL1A	interleukin 1, alpha	0.0287596	0.0275897	21.7814	31.8596	0.683667	down
212195_at	IL6ST	interleukin 6 signal transducer (gp130, oncostatin M receptor)	0.0062232	0.0128573	1579.16	3334.38	0.473599	down
229025_s_at	IMMP1L	IMP1 inner mitochondrial membrane peptidase-like (S. cerevisiae)	0.0150468	0.0195278	265.699	364.094	0.729755	down
240570_at	INADL	InaD-like (Drosophila)	0.014304	0.0190976	12.7037	25.6839	0.494619	down
205070_at	ING3	inhibitor of growth family, member 3	0.0149331	0.0195024	445.036	615.474	0.723077	down
228287_at	ING5	inhibitor of growth family, member 5	0.0060572	0.0126605	175.341	250.974	0.698641	down
227931_at	INO80D	INO80 complex subunit D	0.0036894	0.0102011	292.333	514.696	0.567971	down
238488_at	IPO11 /// LRRC70	importin 11 /// leucine rich repeat containing 70	0.0414809	0.0341378	49.5654	67.4641	0.734693	down
221974_at	IPW	imprinted in Prader-Willi syndrome (non-protein coding)	0.0065228	0.0131228	28.7955	58.5431	0.491869	down
204686_at	IRS1	insulin receptor substrate 1	0.0216109	0.0235895	42.2256	72.566	0.581892	down
215177_s_at	ITGA6	integrin, alpha 6	0.032457	0.0296406	50.7541	94.9885	0.534318	down
1554306_at	ITPKB	inositol 1,4,5-trisphosphate 3-kinase B	0.01282	0.0179003	113.712	250.158	0.454561	down
241985_at	JMY	junction mediating and regulatory protein, p53 cofactor	0.0238478	0.0248519	64.9768	112.986	0.575088	down
223584_s_at	KBTBD2	kelch repeat and BTB (POZ) domain containing 2	0.0145484	0.0192946	132.712	231.723	0.572719	down
214595_at	KCNG1	potassium voltage-gated channel, subfamily G, member 1	0.0160698	0.020063	38.1252	59.5498	0.640223	down
1552742_at	KCNH8	potassium voltage-gated channel, subfamily H (eag-related), member 8	0.0423504	0.0345366	20.4177	30.2649	0.674632	down
1556493_a_at	KDM4C	lysine (K)-specific demethylase 4C	0.0293236	0.0278989	24.7959	42.0477	0.58971	down
1556066_at	KDM6B	lysine (K)-specific demethylase 6B	0.0030879	0.00946482	124.946	193.985	0.6441	down
224870_at	KIAA0114	KIAA0114	0.0285339	0.0274929	827.674	1111.69	0.744516	down
213340_s_at	KIAA0495	KIAA0495	0.0441924	0.0352731	215.845	306.463	0.70431	down
235674_at	KIAA0922	KIAA0922	0.0135628	0.0185213	277.412	386	0.718685	down
226248_s_at	KIAA1324	KIAA1324	5.6e-06	0.00180935	45.4339	98.4858	0.461325	down
219570_at	KIF16B	kinesin family member 16B	0.0430659	0.0347344	41.2714	54.202	0.761437	down
203129_s_at	KIF5C	kinesin family member 5C	0.0008485	0.00658645	31.5817	46.6722	0.676671	down
204334_at	KLF7	Kruppel-like factor 7 (ubiquitous)	0.0006447	0.006462	286.908	516.939	0.555012	down
1552733_at	KLHDC1	kelch domain containing 1	0.0290905	0.0277418	108.13	166.107	0.650965	down
235727_at	KLHL28	kelch-like 28 (Drosophila)	0.003928	0.0106115	129.619	235.639	0.550076	down
1553873_at	KLHL34	kelch-like 34 (Drosophila)	0.0010631	0.006794	11.6999	26.5641	0.440439	down
1560396_at	KLHL6	kelch-like 6 (Drosophila)	0.005	0.0118284	231.695	373.469	0.620384	down
203203_s_at	KRR1	KRR1, small subunit (SSU) processome component, homolog (yeast)	0.0058032	0.0124835	131.756	226.638	0.581349	down
205569_at	LAMP3	lysosomal-associated membrane protein 3	0.0012103	0.00703322	47.1922	123.363	0.382547	down
208767_s_at	LAPTM4B	lysosomal protein transmembrane 4 beta	0.0051886	0.0119625	31.1337	42.8095	0.727262	down
201030_x_at	LDHB	lactate dehydrogenase B	0.005964	0.0126111	4982.23	7873.13	0.632815	down
202595_s_at	LEPROTL1	leptin receptor overlapping transcript-like 1	0.010386	0.0162112	1335.93	2441.36	0.547206	down
1557558_s_at	LOC100129196	similar to hCG2033298	0.0091848	0.0151874	66.2215	131.498	0.503593	down
227406_at	LOC100129387	hypothetical LOC100129387	0.0126401	0.0177344	144.888	226.277	0.640313	down
238771_at	LOC100129899	Hypothetical protein LOC100129899	0.004483	0.0113516	130.899	192.66	0.679426	down
215229_at	LOC100129973	hypothetical protein LOC100129973	0.0176294	0.0210653	15.8454	24.4705	0.647532	down
242255_at	LOC100130837	Hypothetical protein LOC100130837	0.0054775	0.012155	54.2506	72.3392	0.749948	down
235443_at	LOC100131067	hypothetical protein LOC100131067	0.0186782	0.0217553	86.159	124.336	0.692953	down
229636_at	LOC100131226	Hypothetical protein LOC100131226	0.0409261	0.0338603	62.4125	96.0845	0.649559	down
1558046_x_at	LOC100132864 /// LOC100293492 /// LOC389906 /// LOC441528 /// LOC729162	hypothetical LOC100132864 /// hypothetical protein LOC100293492 /// similar to S	0.0255375	0.0258495	31.5743	41.2186	0.766019	down
229872_s_at	LOC100132999	hypothetical protein LOC100132999	0.0136137	0.0185226	2290.79	3725.55	0.614885	down
228588_s_at	LOC100287379 /// UBE2B	similar to hCG1980975 /// ubiquitin-conjugating enzyme E2B (RAD6 homolog)	0.0120365	0.0173771	559.463	786.209	0.711596	down
237107_at	LOC100289695 /// PRKRA	similar to protein kinase, interferon-inducible double stranded RNA dependent ac	0.0146784	0.0194209	47.8923	73.2963	0.653407	down
229264_at	LOC100292701	hypothetical LOC100292701	0.0156408	0.0198315	244.672	356.286	0.686729	down
1560703_at	LOC201229	Hypothetical protein LOC201229	0.0021466	0.00825043	42.6625	70.9264	0.601504	down
220609_at	LOC202181	hypothetical protein LOC202181	0.0322328	0.0295361	142.184	177.474	0.801155	down
229090_at	LOC220930	hypothetical LOC220930	0.0066003	0.0131608	23.1816	34.6546	0.668935	down
1555892_s_at	LOC253039	hypothetical LOC253039	0.0093758	0.0154155	54.2207	83.8097	0.64695	down
230937_at	LOC285835	hypothetical protein LOC285835	0.0163657	0.0202989	157.282	190.056	0.827553	down
238263_at	LOC285965	hypothetical protein LOC285965	9.42e-05	0.0038045	34.6091	66.101	0.523579	down
222196_at	LOC286434	hypothetical protein LOC286434	0.0089613	0.0151444	17.9808	31.2506	0.575373	down
232340_at	LOC388889	hypothetical LOC388889	0.0393131	0.0331716	237.481	295.554	0.803513	down
232315_at	LOC400713	zinc finger protein LOC400713	0.0073178	0.0136977	39.4648	55.597	0.709837	down
229094_at	LOC401431	hypothetical LOC401431	0.015619	0.0198315	31.9612	57.3147	0.557645	down
232594_at	LOC440498	heat shock factor binding protein 1-like	0.002482	0.00863322	167.007	312.719	0.534048	down
1557293_at	LOC440993	hypothetical LOC440993	0.0138269	0.0187076	80.8204	115.012	0.702716	down
243009_at	LOC441242	Hypothetical LOC441242	0.0497366	0.0376958	34.966	47.0464	0.743223	down
228909_at	LOC642852	hypothetical LOC642852	0.0042578	0.0110055	70.6356	113.231	0.623816	down
222347_at	LOC644450	hypothetical protein LOC644450	0.0074001	0.0136977	36.2509	44.423	0.81604	down
1561759_at	LOC645513	Hypothetical LOC645513	0.0088638	0.0151049	23.9763	34.2916	0.699188	down
1569871_at	LOC650392	Hypothetical protein LOC650392	0.0021076	0.00816505	98.8959	152.842	0.647045	down
235888_at	LOC728411	glucuronidase, beta pseudogene	0.032034	0.0294662	17.7493	28.1785	0.629889	down
234562_x_at	LOC728678	Similar to p40	0.0006413	0.006462	56.8293	105.989	0.536184	down
242931_at	LONRF3	LON peptidase N-terminal domain and ring finger 3	0.0396798	0.033348	96.833	125.499	0.771581	down
47560_at	LPHN1	latrophilin 1	0.0496751	0.0376938	79.6997	125.529	0.634908	down
211596_s_at	LRIG1	leucine-rich repeats and immunoglobulin-like domains 1	0.0065143	0.013122	313.056	455.241	0.68767	down
225745_at	LRP6	low density lipoprotein receptor-related protein 6	0.0114928	0.017037	15.884	29.6114	0.536417	down
230793_at	LRRC16A	leucine rich repeat containing 16A	0.0083873	0.0147543	20.6344	36.0835	0.571851	down
212978_at	LRRC8B	leucine rich repeat containing 8 family, member B	0.0148453	0.0194506	147.833	209.042	0.707195	down
207339_s_at	LTB	lymphotoxin beta (TNF superfamily, member 3)	0.0044483	0.0112991	3624.65	5437.29	0.666629	down
225469_at	LYRM5	LYR motif containing 5	0.0090542	0.0151462	606.14	881.5	0.687624	down
205193_at	MAFF	v-maf musculoaponeurotic fibrosarcoma oncogene homolog F (avian)	0.0422254	0.0344878	117.067	194.272	0.602595	down
224558_s_at	MALAT1	metastasis associated lung adenocarcinoma transcript 1 (non-protein coding)	0.0270263	0.0266063	2745.16	3558.42	0.771456	down
235457_at	MAML2	mastermind-like 2 (Drosophila)	0.0028459	0.00915045	346.658	738.693	0.469285	down
205699_at	MAP2K6	mitogen-activated protein kinase kinase 6	0.0031963	0.0095978	36.7256	71.0935	0.516581	down
228423_at	MAP9	microtubule-associated protein 9	0.011049	0.0166975	39.167	67.0316	0.584306	down
40016_g_at	MAST4	microtubule associated serine/threonine kinase family member 4	0.0084722	0.0148495	180.204	329.215	0.547376	down
228468_at	MASTL	microtubule associated serine/threonine kinase-like	0.0277955	0.0271321	65.3337	88.141	0.74124	down
226225_at	MCC	mutated in colorectal cancers	0.0024273	0.0085625	19.3758	36.4777	0.531169	down
212935_at	MCF2L	MCF.2 cell line derived transforming sequence-like	0.0008321	0.00658297	55.1665	92.6625	0.595349	down
235374_at	MDH1	Malate dehydrogenase 1, NAD (soluble)	0.0384094	0.0327443	131.592	215.304	0.611195	down
1553508_at	MDS2	myelodysplastic syndrome 2 translocation associated	0.0014312	0.00743442	21.7836	42.7142	0.509985	down
212207_at	MED13L	mediator complex subunit 13-like	0.0057825	0.0124835	245.667	382.715	0.641906	down
208328_s_at	MEF2A	myocyte enhancer factor 2A	0.039851	0.0333917	175.652	259.263	0.677506	down
226869_at	MEGF6	multiple EGF-like-domains 6	4e-07	0.0006462	137.488	330.303	0.416248	down
226039_at	MGAT4A	mannosyl (alpha-1,3-)-glycoprotein beta-1,4-N-acetylglucosaminyltransferase, iso	0.0242829	0.0250833	909.422	1486.43	0.611816	down
223494_at	MGEA5	meningioma expressed antigen 5 (hyaluronidase)	0.0169891	0.020662	1107.15	1630.54	0.679009	down
209733_at	MID2	midline 2	0.0028333	0.00914225	21.8607	54.0168	0.404701	down
204918_s_at	MLLT3	myeloid/lymphoid or mixed-lineage leukemia (trithorax homolog, Drosophila); tran	0.0179615	0.0212422	39.831	64.2305	0.620125	down
225157_at	MLXIP	MLX interacting protein	0.0449182	0.0355319	681.004	813.98	0.836634	down
242082_at	MMAB	methylmalonic aciduria (cobalamin deficiency) cblB type	0.0493365	0.0376374	65.6345	85.2295	0.770091	down
226092_at	MPP5	membrane protein, palmitoylated 5 (MAGUK p55 subfamily member 5)	0.0015154	0.00750862	72.1316	117.188	0.615523	down
225240_s_at	MSI2	musashi homolog 2 (Drosophila)	0.0173688	0.0209086	215.846	423.454	0.509727	down
226852_at	MTA3	metastasis associated 1 family, member 3	0.0392294	0.0331287	62.6627	86.5056	0.724377	down
1557965_at	MTERFD2	MTERF domain containing 2	0.0027059	0.00890303	217.126	345.281	0.628837	down
239846_at	MTHFD1	Methylenetetrahydrofolate dehydrogenase (NADP+ dependent) 1, methenyltetrahydrof	0.0303823	0.0284994	33.6031	67.4486	0.498203	down
219822_at	MTRF1	mitochondrial translational release factor 1	0.0226975	0.0241872	213.875	276.919	0.772338	down
232156_at	MUDENG	MU-2/AP1M2 domain containing, death-inducing	0.0365496	0.0317885	46.229	62.6359	0.738059	down
202431_s_at	MYC	v-myc myelocytomatosis viral oncogene homolog (avian)	0.0006422	0.006462	658.217	1220.94	0.539105	down
229464_at	MYEF2	myelin expression factor 2	0.0336317	0.0302685	46.0902	64.381	0.715897	down
223130_s_at	MYLIP	myosin regulatory light chain interacting protein	0.0465656	0.0363239	1166.2	1775.18	0.656946	down
205826_at	MYOM2	myomesin (M-protein) 2, 165kDa	0.0278521	0.0271358	157.366	210.687	0.746921	down
242576_x_at	N4BP2L2	NEDD4 binding protein 2-like 2	0.0087504	0.0150546	141.975	189.403	0.749591	down
208754_s_at	NAP1L1	nucleosome assembly protein 1-like 1	0.0167913	0.0205596	1045.64	1414.71	0.73912	down
204749_at	NAP1L3	nucleosome assembly protein 1-like 3	0.0046145	0.0113711	15.8254	44.2733	0.357448	down
219378_at	NARG1L	NMDA receptor regulated 1-like	0.0198393	0.0224536	574.471	857.928	0.669603	down
228960_at	NARG2	NMDA receptor regulated 2	0.023357	0.0245339	68.8195	89.5779	0.768264	down
221207_s_at	NBEA	neurobeachin	0.0033344	0.00977627	36.9707	75.9886	0.48653	down
1554106_at	NBEAL1	neurobeachin-like 1	0.0070741	0.0135612	20.5385	36.2705	0.566258	down
227926_s_at	NBPF11 /// RP11-94I2.2	neuroblastoma breakpoint family, member 11 /// neuroblastoma breakpoint family,	0.0115162	0.017037	85.6831	116.364	0.736335	down
232885_at	NCRNA00081	non-protein coding RNA 81	0.0072038	0.0136593	16.2224	24.4892	0.662431	down
230488_s_at	NCRNA00118	non-protein coding RNA 118	0.0469851	0.0364925	43.8928	58.6473	0.74842	down
222423_at	NDFIP1	Nedd4 family interacting protein 1	0.0075887	0.0139493	740.169	1286.75	0.575223	down
201829_at	NET1	neuroepithelial cell transforming 1	0.0001385	0.00399548	62.9004	143.209	0.43922	down
212739_s_at	NME4	non-metastatic cells 4, protein expressed in	0.014528	0.0192946	158.315	227.143	0.696985	down
217950_at	NOSIP	nitric oxide synthase interacting protein	0.0041047	0.0107999	1128.95	2388.13	0.472733	down
205129_at	NPM3	nucleophosmin/nucleoplasmin 3	0.0384771	0.0327847	129.499	179.641	0.720879	down
236951_at	NSFL1C	NSFL1 (p97) cofactor (p47)	0.0083894	0.0147543	103.942	127.146	0.817504	down
232148_at	NSMAF	Neutral sphingomyelinase (N-SMase) activation associated factor	0.0402695	0.0336204	146.262	187.589	0.779691	down
222128_at	NSUN6	NOL1/NOP2/Sun domain family, member 6	0.0244617	0.0252047	95.0457	124.232	0.765065	down
1553994_at	NT5E	5'-nucleotidase, ecto (CD73)	0.0061904	0.0128542	15.902	28.3547	0.560824	down
203675_at	NUCB2	nucleobindin 2	0.0025305	0.0087351	403.21	928.157	0.43442	down
212183_at	NUDT4	nudix (nucleoside diphosphate linked moiety X)-type motif 4	0.0453827	0.035713	215.493	268.759	0.801805	down
205134_s_at	NUFIP1	nuclear fragile X mental retardation protein interacting protein 1	0.0292297	0.0278259	99.3763	160.818	0.617943	down
239948_at	NUP153	nucleoporin 153kDa	0.0029479	0.00922893	25.2164	36.6472	0.688085	down
218708_at	NXT1	NTF2-like export factor 1	0.0383869	0.0327443	531.031	747.091	0.710798	down
229854_at	OBSCN	obscurin, cytoskeletal calmodulin and titin-interacting RhoGEF	0.013625	0.0185226	43.1851	75.4746	0.57218	down
225314_at	OCIAD2	OCIA domain containing 2	0.0247989	0.0254205	707.637	1058.69	0.668408	down
222290_at	OR2A20P /// OR2A5 /// OR2A9P	olfactory receptor, family 2, subfamily A, member 20 pseudogene /// olfactory re	0.0020869	0.0081505	37.6011	61.1647	0.614751	down
1555890_at	OR2A20P /// OR2A9P	olfactory receptor, family 2, subfamily A, member 20 pseudogene /// olfactory re	0.0003717	0.00536145	41.6372	91.4327	0.455386	down
219073_s_at	OSBPL10	oxysterol binding protein-like 10	0.0407857	0.0338323	133.826	241.402	0.554372	down
230170_at	OSM	oncostatin M	0.0006284	0.006462	140.391	321.396	0.436817	down
214615_at	P2RY10	purinergic receptor P2Y, G-protein coupled, 10	0.0084737	0.0148495	30.8981	49.1565	0.628567	down
221868_at	PAIP2B	poly(A) binding protein interacting protein 2B	0.0178347	0.0211386	47.4706	83.1973	0.570579	down
202760_s_at	PALM2-AKAP2	PALM2-AKAP2 readthrough transcript	0.0372038	0.0320377	135.747	216.613	0.626679	down
1554116_s_at	PARP11	poly (ADP-ribose) polymerase family, member 11	0.0445778	0.035379	54.069	107.244	0.504166	down
228905_at	PCM1	pericentriolar material 1	0.0444691	0.0353596	125.571	170.42	0.736833	down
238114_at	PCMTD1	Protein-L-isoaspartate (D-aspartate) O-methyltransferase domain containing 1	0.0024613	0.00860655	110.602	164.433	0.672626	down
212594_at	PDCD4	programmed cell death 4 (neoplastic transformation inhibitor)	0.0177045	0.0210771	438.712	650.614	0.674304	down
203708_at	PDE4B	phosphodiesterase 4B, cAMP-specific (phosphodiesterase E4 dunce homolog, Drosoph	0.0148391	0.0194506	556.373	849.158	0.655205	down
212390_at	PDE4DIP	phosphodiesterase 4D interacting protein	0.0310362	0.0288558	167.154	256.038	0.652847	down
223358_s_at	PDE7A	phosphodiesterase 7A	0.0017564	0.0076843	1032.3	1803.52	0.572382	down
206686_at	PDK1	pyruvate dehydrogenase kinase, isozyme 1	0.0163425	0.0202931	73.8314	115.653	0.638389	down
210825_s_at	PEBP1	phosphatidylethanolamine binding protein 1	0.0226823	0.024187	1385.22	2133.94	0.649137	down
218319_at	PELI1	pellino homolog 1 (Drosophila)	0.0086629	0.014992	877.26	1375.59	0.637732	down
203969_at	PEX3	peroxisomal biogenesis factor 3	0.0027056	0.00890303	57.7398	92.4561	0.624511	down
205420_at	PEX7	peroxisomal biogenesis factor 7	0.0349986	0.0310149	62.9744	75.4585	0.834557	down
204992_s_at	PFN2	profilin 2	0.0042369	0.0110055	35.3887	68.7068	0.515068	down
220576_at	PGAP1	post-GPI attachment to proteins 1	0.0151596	0.0195697	37.1612	65.4489	0.56779	down
40446_at	PHF1	PHD finger protein 1	0.0055393	0.0122418	689.368	984.34	0.700335	down
222133_s_at	PHF20L1	PHD finger protein 20-like 1	0.0097274	0.0157275	181.111	267.715	0.676505	down
1557948_at	PHLDB3	pleckstrin homology-like domain, family B, member 3	0.0034317	0.00989985	79.4551	124.33	0.639066	down
204369_at	PIK3CA	phosphoinositide-3-kinase, catalytic, alpha polypeptide	0.0132463	0.0182858	196.703	261.803	0.75134	down
212249_at	PIK3R1	phosphoinositide-3-kinase, regulatory subunit 1 (alpha)	0.0365048	0.0317885	29.8449	52.985	0.563271	down
223551_at	PKIB	protein kinase (cAMP-dependent, catalytic) inhibitor beta	0.0088228	0.0150988	19.8447	24.8519	0.798519	down
228084_at	PLA2G12A	phospholipase A2, group XIIA	0.0032887	0.00973907	115.539	178.362	0.647779	down
241859_at	PLCL1	phospholipase C-like 1	0.0019473	0.00799098	15.9743	41.5147	0.384788	down
227037_at	PLD6	phospholipase D family, member 6	0.0047194	0.011428	103.947	153.121	0.678855	down
218640_s_at	PLEKHF2	pleckstrin homology domain containing, family F (with FYVE domain) member 2	0.02194	0.0237847	765.213	1018.63	0.751217	down
201939_at	PLK2	polo-like kinase 2 (Drosophila)	0.0498805	0.0377433	36.1946	49.6072	0.729624	down
204286_s_at	PMAIP1	phorbol-12-myristate-13-acetate-induced protein 1	0.0108627	0.0165867	621.283	900.512	0.689922	down
242201_at	PMS2L2	postmeiotic segregation increased 2-like 2 pseudogene	0.0010464	0.006794	175.515	233.898	0.750391	down
1567214_a_at	PNN	pinin, desmosome associated protein	0.025234	0.0256548	965.138	1166.95	0.827058	down
239392_s_at	POGK	pogo transposable element with KRAB domain	0.0224064	0.0240578	197.759	314.561	0.628682	down
205878_at	POU6F1	POU class 6 homeobox 1	0.0009975	0.006794	90.5458	160.174	0.565295	down
210946_at	PPAP2A	phosphatidic acid phosphatase type 2A	0.0493861	0.0376374	79.1179	109.646	0.721579	down
37152_at	PPARD	peroxisome proliferator-activated receptor delta	0.0141643	0.0190054	344.089	495.707	0.694137	down
202166_s_at	PPP1R2	protein phosphatase 1, regulatory (inhibitor) subunit 2	0.0011538	0.00692982	732.265	1056.1	0.693368	down
227409_at	PPP1R3E	protein phosphatase 1, regulatory (inhibitor) subunit 3E	0.0107383	0.0164412	69.7722	104.65	0.66672	down
235085_at	PRAGMIN	homolog of rat pragma of Rnd2	0.0081949	0.0145642	365.967	749.303	0.48841	down
235780_at	PRKACB	protein kinase, cAMP-dependent, catalytic, beta	0.0094883	0.0155303	67.4661	115.936	0.581924	down
228722_at	PRMT2	protein arginine methyltransferase 2	0.0407967	0.0338323	222.619	317.398	0.701387	down
223797_at	PRO2852	hypothetical protein PRO2852	0.011249	0.0169049	490.493	672.574	0.729279	down
204447_at	ProSAPiP1	ProSAPiP1 protein	0.0126463	0.0177344	36.7673	57.7621	0.636529	down
230352_at	PRPS2	Phosphoribosyl pyrophosphate synthetase 2	0.0069555	0.0134893	29.9636	45.812	0.654055	down
210758_at	PSIP1	PC4 and SFRS1 interacting protein 1	0.0004974	0.00578465	123.691	212.361	0.582458	down
232648_at	PSMA3	proteasome (prosome, macropain) subunit, alpha type, 3	0.0274284	0.0268386	26.503	36.2107	0.731911	down
244801_at	PSMB7	Proteasome (prosome, macropain) subunit, beta type, 7	0.0089197	0.0151444	22.8142	42.4269	0.53773	down
242055_at	PSMG4	Proteasome (prosome, macropain) assembly chaperone 4	0.0018446	0.00782147	17.1315	33.4735	0.511792	down
200730_s_at	PTP4A1	protein tyrosine phosphatase type IVA, member 1	0.0260986	0.026177	193.14	289.238	0.667754	down
1558290_a_at	PVT1	Pvt1 oncogene (non-protein coding)	0.0029767	0.00926562	169.954	272.122	0.624551	down
59697_at	RAB15	RAB15, member RAS onocogene family	0.001323	0.00724635	119.379	155.433	0.768039	down
223471_at	RAB3IP	RAB3A interacting protein (rabin3)	5.46e-05	0.0032137	68.6287	109.891	0.624519	down
220549_at	RAD54B	RAD54 homolog B (S. cerevisiae)	0.000594	0.00635503	12.6796	24.2805	0.522211	down
220338_at	RALGPS2	Ral GEF with PH domain and SH3 binding motif 2	0.0414402	0.0341223	60.4522	81.7211	0.739738	down
201711_x_at	RANBP2	RAN binding protein 2	0.0013322	0.00724635	59.2864	99.291	0.597098	down
242712_x_at	RANBP2 /// RGPD1 /// RGPD2 /// RGPD3 /// RGPD4 /// RGPD5 /// RGPD6 /// RGPD7 /// RGPD8	RAN binding protein 2 /// RANBP2-like and GRIP domain containing 1 /// RANBP2-li	0.0154765	0.0197796	18.4649	31.1221	0.593303	down
219112_at	RAPGEF6	Rap guanine nucleotide exchange factor (GEF) 6	0.001152	0.00692982	488.065	876.449	0.556866	down
232549_at	RBM11	RNA binding motif protein 11	0.0003859	0.00540058	10.5955	19.9867	0.530131	down
227748_at	RBMXL1	RNA binding motif protein, X-linked-like 1	0.0129388	0.018004	109.743	181.284	0.605368	down
219864_s_at	RCAN3	RCAN family member 3	0.0132035	0.0182756	22.6241	37.0029	0.611415	down
1558116_x_at	RECK	reversion-inducing-cysteine-rich protein with kazal motifs	0.0429564	0.0347154	44.4776	59.2934	0.750128	down
223447_at	REG4	regenerating islet-derived family, member 4	0.007395	0.0136977	16.81	28.1546	0.59706	down
235699_at	REM2	RAS (RAD and GEM)-like GTP binding 2	0.0021917	0.00827265	97.8019	182.9	0.534729	down
235597_s_at	RGPD1 /// RGPD2	RANBP2-like and GRIP domain containing 1 /// RANBP2-like and GRIP domain contain	0.0253688	0.0257271	42.0477	67.803	0.620144	down
212842_x_at	RGPD4 /// RGPD5 /// RGPD6 /// RGPD8	RANBP2-like and GRIP domain containing 4 /// RANBP2-like and GRIP domain contain	0.0010506	0.006794	548.571	823.116	0.666456	down
210676_x_at	RGPD5 /// RGPD6 /// RGPD8	RANBP2-like and GRIP domain containing 5 /// RANBP2-like and GRIP domain contain	8.36e-05	0.00365015	76.332	145.7	0.5239	down
204951_at	RHOH	ras homolog gene family, member H	0.0133773	0.0183924	580.493	938.531	0.618512	down
1559582_at	RHOQ	ras homolog gene family, member Q	0.0324032	0.029625	184.916	250.277	0.738844	down
218598_at	RINT1	RAD50 interactor 1	0.0321685	0.0294992	124.949	159.707	0.782365	down
222815_at	RLIM	ring finger protein, LIM domain interacting	0.0158977	0.019998	83.2215	144.84	0.574577	down
214519_s_at	RLN2	relaxin 2	0.0085579	0.014914	42.1224	73.2334	0.575181	down
207735_at	RNF125	ring finger protein 125	0.0397219	0.033348	235.595	337.746	0.697551	down
239143_x_at	RNF138	ring finger protein 138	0.0453846	0.035713	247.117	360.68	0.685141	down
204040_at	RNF144A	ring finger protein 144A	0.0003118	0.0051382	188.216	353.787	0.532005	down
221908_at	RNFT2	ring finger protein, transmembrane 2	0.004059	0.0107569	57.6223	76.1072	0.75712	down
219550_at	ROBO3	roundabout, axon guidance receptor, homolog 3 (Drosophila)	0.004256	0.0110055	70.3129	115.02	0.611311	down
239151_at	RP11-144G6.7	hypothetical LOC399753	0.0262143	0.0262051	133.25	176.614	0.754471	down
1558719_s_at	RPAIN	RPA interacting protein	0.0090513	0.0151462	53.9625	78.9289	0.683685	down
229590_at	RPL13	ribosomal protein L13	0.0262294	0.0262051	211.657	289.107	0.732107	down
240806_at	RPL15	Ribosomal protein L15	0.0352583	0.0311426	102.066	141.488	0.721373	down
221726_at	RPL22	ribosomal protein L22	0.0090192	0.0151462	1982.94	2815.92	0.704191	down
212044_s_at	RPL27A	Ribosomal protein L27a	0.0056652	0.0123556	309.662	394.078	0.785789	down
200962_at	RPL31	ribosomal protein L31	0.0053593	0.0120418	809.65	1059.55	0.764148	down
241017_at	RPL31 /// TBC1D8	ribosomal protein L31 /// TBC1 domain family, member 8 (with GRAM domain)	0.0085456	0.0149087	59.1348	78.5918	0.75243	down
238026_at	RPL35A	ribosomal protein L35a	0.023213	0.0244823	118.648	198.37	0.598117	down
217019_at	RPS4P6 /// RPS4X	ribosomal protein S4X pseudogene 6 /// ribosomal protein S4, X-linked	0.0057055	0.0124054	76.7318	109.207	0.702627	down
236109_at	RPUSD4	RNA pseudouridylate synthase domain containing 4	0.0120013	0.0173418	71.5536	121.15	0.590617	down
214764_at	RRP15	ribosomal RNA processing 15 homolog (S. cerevisiae)	0.0204723	0.0227896	64.618	108.564	0.595206	down
222790_s_at	RSBN1	round spermatid basic protein 1	0.0207904	0.0230281	412.601	674.16	0.612022	down
236859_at	RUNX2	runt-related transcription factor 2	0.0045246	0.0113711	31.2821	64.2843	0.486621	down
202853_s_at	RYK	RYK receptor-like tyrosine kinase	0.0351953	0.031121	370.314	464.797	0.796721	down
213283_s_at	SALL2	sal-like 2 (Drosophila)	0.0017198	0.0076843	45.4625	77.6477	0.585497	down
1570210_x_at	SAPS2	SAPS domain family, member 2	0.0217827	0.0237287	145.481	204.629	0.710951	down
222669_s_at	SBDS /// SBDSP	Shwachman-Bodian-Diamond syndrome /// Shwachman-Bodian-Diamond syndrome pseudoge	0.027106	0.0266524	1113.1	1828.33	0.608809	down
242064_at	SDK2	sidekick homolog 2 (chicken)	0.0001708	0.0045234	56.7775	126.301	0.44954	down
208942_s_at	SEC62	SEC62 homolog (S. cerevisiae)	0.0435443	0.0349284	1445.62	1902.99	0.759654	down
223538_at	SERF1A	small EDRK-rich factor 1A (telomeric)	0.0018723	0.007836	162.597	248.037	0.655533	down
202657_s_at	SERTAD2	SERTA domain containing 2	0.0030652	0.0094627	875.697	1254.84	0.697855	down
218346_s_at	SESN1	sestrin 1	0.0242992	0.0250833	396.123	604.265	0.655544	down
235683_at	SESN3	sestrin 3	0.0453509	0.035713	44.7688	73.6298	0.608026	down
219751_at	SETD6	SET domain containing 6	0.0217972	0.0237287	73.334	102.596	0.714783	down
214402_s_at	SFI1	Sfi1 homolog, spindle assembly associated (yeast)	0.024923	0.025483	179.753	259.203	0.693486	down
213370_s_at	SFMBT1	Scm-like with four mbt domains 1	0.0303958	0.0284994	141.932	189.984	0.747073	down
200685_at	SFRS11	splicing factor, arginine/serine-rich 11	0.0356711	0.03137	898.913	1237.63	0.726317	down
226412_at	SFRS18	splicing factor, arginine/serine-rich 18	0.0427273	0.0346947	994.931	1404.53	0.70837	down
232597_x_at	SFRS2IP	splicing factor, arginine/serine-rich 2, interacting protein	0.0083571	0.014739	878.511	1144.72	0.767447	down
232392_at	SFRS3	Splicing factor, arginine/serine-rich 3	0.0199552	0.0225281	102.023	157.917	0.646055	down
232055_at	SFXN1	sideroflexin 1	0.0353414	0.0311989	25.1092	36.8524	0.681344	down
228745_at	SGTB	small glutamine-rich tetratricopeptide repeat (TPR)-containing, beta	0.0301818	0.0284639	484.781	685.078	0.707629	down
219513_s_at	SH2D3A	SH2 domain containing 3A	0.0109067	0.0166332	77.5435	130.984	0.592006	down
228461_at	SH3RF3	SH3 domain containing ring finger 3	0.0013097	0.00724635	48.8687	91.6811	0.533029	down
202981_x_at	SIAH1	seven in absentia homolog 1 (Drosophila)	0.0043964	0.0112558	290.785	411.93	0.70591	down
223596_at	SLC12A6	solute carrier family 12 (potassium/chloride transporters), member 6	0.0097567	0.0157275	118.695	175.743	0.67539	down
222939_s_at	SLC16A10	solute carrier family 16, member 10 (aromatic amino acid transporter)	0.0097514	0.0157275	19.2172	39.6659	0.484477	down
218675_at	SLC22A17	solute carrier family 22, member 17	0.0003421	0.0051382	41.4282	74.2595	0.557885	down
223194_s_at	SLC22A23	solute carrier family 22, member 23	0.0078119	0.0141895	28.1057	50.4487	0.557115	down
222529_at	SLC25A37	solute carrier family 25, member 37	0.0090832	0.0151462	461.374	1101.16	0.418988	down
209711_at	SLC35D1	solute carrier family 35 (UDP-glucuronic acid/UDP-N-acetylgalactosamine dual tra	0.0368641	0.0319474	283.712	441.745	0.642253	down
224580_at	SLC38A1	solute carrier family 38, member 1	0.0385982	0.0328186	36.432	53.2285	0.684445	down
219820_at	SLC6A16	solute carrier family 6, member 16	0.0156157	0.0198315	38.7833	55.9268	0.693465	down
203580_s_at	SLC7A6	solute carrier family 7 (cationic amino acid transporter, y+ system), member 6	0.0088094	0.0150918	917.643	1461.04	0.628074	down
1565703_at	SMAD4	SMAD family member 4	0.0011101	0.00687112	53.1064	98.2737	0.540393	down
224610_at	SNHG1	small nucleolar RNA host gene 1 (non-protein coding)	0.015701	0.0198629	1663.41	2621.43	0.634543	down
225155_at	SNHG5	small nucleolar RNA host gene 5 (non-protein coding)	0.0438148	0.0351092	5759.16	7243.58	0.795071	down
1552729_at	SNHG7	small nucleolar RNA host gene 7 (non-protein coding)	0.0201261	0.0226735	58.1836	84.1948	0.69106	down
225220_at	SNHG8	small nucleolar RNA host gene 8 (non-protein coding)	0.0049787	0.0118107	1521.76	2453.55	0.620229	down
228879_at	SNORD104	small nucleolar RNA, C/D box 104	0.0022045	0.00827463	878.473	1277.62	0.687587	down
207474_at	SNRK	SNF related kinase	0.0106232	0.016407	67.1115	117.961	0.568931	down
226591_at	SNRPN	small nuclear ribonucleoprotein polypeptide N	0.0190796	0.0219105	31.896	58.8883	0.541636	down
223027_at	SNX9	sorting nexin 9	0.0269223	0.0265525	164.036	234.727	0.698839	down
203509_at	SORL1	sortilin-related receptor, L(DLR class) A repeats-containing	0.0026968	0.00890303	2172.03	3417.41	0.635577	down
226913_s_at	SOX8	SRY (sex determining region Y)-box 8	0.0006629	0.006462	17.5257	34.8389	0.503049	down
219109_at	SPAG16	sperm associated antigen 16	0.0202622	0.0226829	66.0764	104.435	0.632702	down
1555883_s_at	SPIN3	spindlin family, member 3	0.0067893	0.0133595	109.689	175.474	0.625101	down
212558_at	SPRY1	sprouty homolog 1, antagonist of FGF signaling (Drosophila)	0.0115027	0.017037	29.0182	43.8567	0.661659	down
207040_s_at	ST13	suppression of tumorigenicity 13 (colon carcinoma) (Hsp70 interacting protein)	0.0046689	0.0113937	2068.82	2984.94	0.693086	down
209023_s_at	STAG2	stromal antigen 2	0.0340632	0.0304702	195.739	323.78	0.604545	down
227607_at	STAMBPL1	STAM binding protein-like 1	0.0211978	0.0233152	498.117	624.339	0.79783	down
223746_at	STK4	serine/threonine kinase 4	7.1e-06	0.00191168	925.858	1508.05	0.613944	down
233251_at	STRBP	Spermatid perinuclear RNA binding protein	0.015176	0.0195697	35.3778	65.5398	0.539791	down
228853_at	STYX	serine/threonine/tyrosine interacting protein	0.0460848	0.0360394	581.835	781.796	0.744229	down
227182_at	SUSD3	sushi domain containing 3	0.0001989	0.00484027	276.695	577.722	0.478941	down
230006_s_at	SVIP	small VCP/p97-interacting protein	4.5e-06	0.00180935	165.855	394.023	0.420928	down
212828_at	SYNJ2	synaptojanin 2	8.62e-05	0.00366462	72.4113	142.217	0.509161	down
242109_at	SYTL3	Synaptotagmin-like 3	0.0164769	0.0203216	119.659	186.4	0.641946	down
1557305_at	TACC1	Transforming, acidic coiled-coil containing protein 1	0.0201961	0.0226829	42.1593	68.3612	0.616714	down
218750_at	TAF1D	TATA box binding protein (TBP)-associated factor, RNA polymerase I, D, 41kDa	0.0367071	0.0318766	179.522	260.335	0.689579	down
223231_at	TATDN1	TatD DNase domain containing 1	0.0038658	0.0104785	385.515	558.938	0.689729	down
1569566_at	TBC1D1	TBC1 (tre-2/USP6, BUB2, cdc16) domain family, member 1	0.0147659	0.0194506	113.969	144.274	0.789948	down
204045_at	TCEAL1	transcription elongation factor A (SII)-like 1	0.0397085	0.033348	121.734	167.414	0.727142	down
212387_at	TCF4	transcription factor 4	0.0176607	0.0210715	211.157	272.124	0.77596	down
1565525_a_at	TCP11L2	t-complex 11 (mouse)-like 2	0.0008521	0.00658645	17.9835	27.8081	0.6467	down
1569392_at	TECR	trans-2,3-enoyl-CoA reductase	0.0100541	0.0160181	28.883	59.4679	0.48569	down
203176_s_at	TFAM	transcription factor A, mitochondrial	0.0027273	0.00890665	99.5411	176.114	0.565207	down
218724_s_at	TGIF2	TGFB-induced factor homeobox 2	0.0284571	0.0274791	62.9828	100.837	0.624599	down
227636_at	THAP5	THAP domain containing 5	0.040758	0.0338323	198.919	265.45	0.749365	down
222931_s_at	THNSL1	threonine synthase-like 1 (S. cerevisiae)	0.0216769	0.0236455	38.1131	61.4568	0.62016	down
206555_s_at	THUMPD1	THUMP domain containing 1	0.0434568	0.034904	799.286	1163.54	0.686941	down
40837_at	TLE2	transducin-like enhancer of split 2 (E(sp1) homolog, Drosophila)	0.0019769	0.00801312	92.2596	217.388	0.424401	down
238886_at	TMED10	transmembrane emp24-like trafficking protein 10 (yeast)	0.0118601	0.0172969	41.6953	70.085	0.594924	down
218897_at	TMEM177	transmembrane protein 177	0.0257004	0.0259008	31.213	45.532	0.685517	down
213285_at	TMEM30B	transmembrane protein 30B	0.0021559	0.00825043	14.3282	38.2944	0.374159	down
218772_x_at	TMEM38B	transmembrane protein 38B	0.0310527	0.0288558	71.7233	89.8993	0.797818	down
230323_s_at	TMEM45B	transmembrane protein 45B	0.0009286	0.00669712	12.8638	30.9698	0.415367	down
242243_at	TMF1	TATA element modulatory factor 1	0.0172993	0.020856	46.3636	78.4743	0.590812	down
231775_at	TNFRSF10A	tumor necrosis factor receptor superfamily, member 10a	0.0043669	0.011198	262.028	407.638	0.642795	down
241819_at	TNFSF8	tumor necrosis factor (ligand) superfamily, member 8	0.0455059	0.0357736	252.163	332.712	0.757901	down
221829_s_at	TNPO1	transportin 1	0.0163957	0.0202989	863.476	1248.56	0.691576	down
228834_at	TOB1	transducer of ERBB2, 1	0.0201902	0.0226829	256.784	410.56	0.625449	down
212773_s_at	TOMM20	translocase of outer mitochondrial membrane 20 homolog (yeast)	0.0233185	0.0245339	1851.97	2530.26	0.731927	down
225802_at	TOP1MT	topoisomerase (DNA) I, mitochondrial	0.0005885	0.00633815	155.736	233.15	0.667962	down
204071_s_at	TOPORS	topoisomerase I binding, arginine/serine-rich	0.0001141	0.00381138	265.339	435.625	0.609099	down
204083_s_at	TPM2	tropomyosin 2 (beta)	0.0062328	0.0128573	91.476	144.508	0.633016	down
204140_at	TPST1	tyrosylprotein sulfotransferase 1	0.001315	0.00724635	42.9121	58.8386	0.72932	down
217412_at	TRA@	T cell receptor alpha locus	0.0428377	0.0347063	66.9806	107.184	0.624911	down
215275_at	TRAF3IP3	TRAF3 interacting protein 3	0.0431937	0.0348201	491.822	751.224	0.654694	down
217147_s_at	TRAT1	T cell receptor associated transmembrane adaptor 1	0.0174071	0.0209233	260.608	452.235	0.576266	down
1554250_s_at	TRIM73	tripartite motif-containing 73	0.0014046	0.00743442	242.207	400.587	0.60463	down
1554182_at	TRIM73 /// TRIM74	tripartite motif-containing 73 /// tripartite motif-containing 74	0.0088424	0.0151002	23.4828	44.7898	0.52429	down
205238_at	TRMT2B	TRM2 tRNA methyltransferase 2 homolog B (S. cerevisiae)	0.0101243	0.0160835	34.2838	48.9699	0.7001	down
205802_at	TRPC1	transient receptor potential cation channel, subfamily C, member 1	2.33e-05	0.0029079	15.0341	31.7101	0.474111	down
225484_at	TSGA14	testis specific, 14	0.0039435	0.0106356	87.4575	136.357	0.641388	down
244521_at	TSHZ2	Teashirt zinc finger homeobox 2	0.0009233	0.00669712	15.3042	36.8461	0.415355	down
201513_at	TSN	translin	0.048763	0.0374231	169.814	211.75	0.801954	down
227307_at	TSPAN18	Tetraspanin 18	0.0281939	0.0273171	90.2383	139.87	0.64516	down
226482_s_at	TSTD1	thiosulfate sulfurtransferase (rhodanese)-like domain containing 1	3.42e-05	0.00295503	788.121	1357.63	0.580514	down
244571_s_at	TTC12	Tetratricopeptide repeat domain 12	0.0053448	0.0120418	50.3235	96.3289	0.522413	down
229170_s_at	TTC18	tetratricopeptide repeat domain 18	0.0025689	0.0087925	21.3867	36.1815	0.591095	down
230747_s_at	TTC39C	tetratricopeptide repeat domain 39C	0.0378972	0.0324446	264.505	349.239	0.757374	down
213172_at	TTC9	tetratricopeptide repeat domain 9	0.0028352	0.00914225	47.1648	99.0556	0.476145	down
224003_at	TTTY14	testis-specific transcript, Y-linked 14 (non-protein coding)	0.0434923	0.034904	38.7985	48.2381	0.804312	down
231853_at	TUBD1	tubulin, delta 1	0.0016812	0.0076843	120.565	179.17	0.672904	down
226181_at	TUBE1	tubulin, epsilon 1	0.0331663	0.0300169	74.0425	120.077	0.616625	down
212840_at	UBXN7	UBX domain protein 7	0.0096754	0.0157092	63.4625	96.1539	0.66001	down
204881_s_at	UGCG	UDP-glucose ceramide glucosyltransferase	0.0001272	0.00381138	211.239	562.81	0.375328	down
206487_at	UNC84A	unc-84 homolog A (C. elegans)	0.0045945	0.0113711	88.4288	163.226	0.541755	down
244046_at	URG4	up-regulated gene 4	0.0250019	0.0255152	107.948	181.364	0.595202	down
231817_at	USP53	ubiquitin specific peptidase 53	0.0015687	0.00758273	30.1047	69.3708	0.433967	down
1562238_at	USPL1	ubiquitin specific peptidase like 1	0.0059237	0.0125752	17.4197	29.7294	0.58594	down
225583_at	UXS1	UDP-glucuronate decarboxylase 1	0.0046412	0.0113937	690.054	929.672	0.742255	down
214785_at	VPS13A	vacuolar protein sorting 13 homolog A (S. cerevisiae)	0.0312522	0.0289329	47.583	75.2269	0.632526	down
240282_at	WDR1	WD repeat domain 1	0.0232922	0.0245297	141.71	208.789	0.678722	down
220917_s_at	WDR19	WD repeat domain 19	0.0427805	0.0346947	204.93	272.662	0.75159	down
230152_at	WDR52	WD repeat domain 52	0.0410305	0.0338879	62.2805	86.5432	0.719646	down
236047_at	XKR6	XK, Kell blood group complex subunit-related family, member 6	0.0146981	0.0194311	19.9432	29.2592	0.681603	down
227910_at	XPNPEP3	X-prolyl aminopeptidase (aminopeptidase P) 3, putative	0.003953	0.0106362	69.5768	104.64	0.664916	down
218911_at	YEATS4	YEATS domain containing 4	0.0377995	0.0324125	118.112	172.763	0.683668	down
222863_at	ZBTB10	zinc finger and BTB domain containing 10	0.019881	0.0224757	12.4159	17.9646	0.691128	down
222357_at	ZBTB20	zinc finger and BTB domain containing 20	0.0062172	0.0128573	199.481	319.263	0.624818	down
204181_s_at	ZBTB43	zinc finger and BTB domain containing 43	0.0078737	0.0142441	133.607	190.878	0.69996	down
220104_at	ZC3HAV1	zinc finger CCCH-type, antiviral 1	0.0119843	0.0173327	247.4	368.656	0.671085	down
225784_s_at	ZC4H2	zinc finger, C4H2 domain containing	0.0256502	0.025892	66.867	94.9748	0.70405	down
212655_at	ZCCHC14	zinc finger, CCHC domain containing 14	0.0425022	0.0346255	156.795	220.326	0.711649	down
224503_s_at	ZCCHC2	zinc finger, CCHC domain containing 2	0.0408166	0.0338323	72.7575	98.5576	0.738223	down
228749_at	ZDBF2	zinc finger, DBF-type containing 2	0.0087136	0.0150393	40.8132	68.092	0.599383	down
1552283_s_at	ZDHHC11	zinc finger, DHHC-type containing 11	0.0007801	0.00647675	21.2838	30.9632	0.68739	down
212764_at	ZEB1	zinc finger E-box binding homeobox 1	0.0003424	0.0051382	224.408	433.85	0.517247	down
218919_at	ZFAND1	zinc finger, AN1-type domain 1	0.0315732	0.0291466	302.911	406.892	0.74445	down
227796_at	ZFP62	zinc finger protein 62 homolog (mouse)	0.0323205	0.0295829	327.797	452.723	0.724055	down
216350_s_at	ZNF10	zinc finger protein 10	0.0121739	0.0174843	27.4214	40.9367	0.669849	down
1552633_at	ZNF101	zinc finger protein 101	0.0086137	0.0149789	248.34	470.366	0.527971	down
1557384_at	ZNF131	Zinc finger protein 131	0.0013125	0.00724635	160.363	230.586	0.695457	down
244743_x_at	ZNF138	zinc finger protein 138	0.0014675	0.0074389	44.1672	65.8073	0.671159	down
219854_at	ZNF14	zinc finger protein 14	0.0335474	0.0302263	106.739	179.494	0.594669	down
207417_s_at	ZNF177	zinc finger protein 177	0.0183846	0.0215845	31.7139	45.1332	0.702672	down
239937_at	ZNF207	Zinc finger protein 207	0.0085027	0.014882	199.855	262.721	0.760714	down
223714_at	ZNF256	zinc finger protein 256	0.0204176	0.022748	32.0146	56.7016	0.564617	down
204937_s_at	ZNF274	zinc finger protein 274	0.0001117	0.00381138	350.702	530.75	0.660766	down
225382_at	ZNF275	zinc finger protein 275	0.0229995	0.0243484	59.4978	78.0512	0.762293	down
225539_at	ZNF295	zinc finger protein 295	0.0223614	0.0240352	143.851	203.63	0.706433	down
219765_at	ZNF329	zinc finger protein 329	0.0198231	0.0224536	113.089	184.621	0.612547	down
227613_at	ZNF331	zinc finger protein 331	0.0300788	0.0284138	70.7059	120.77	0.585461	down
1557260_a_at	ZNF382	zinc finger protein 382	0.0035554	0.0100065	31.5705	46.4969	0.678981	down
218149_s_at	ZNF395	zinc finger protein 395	0.0004529	0.0055012	508.596	832.503	0.610924	down
228927_at	ZNF397	zinc finger protein 397	0.0160703	0.020063	217.754	329.355	0.661152	down
236562_at	ZNF439	zinc finger protein 439	0.0140276	0.0189026	64.6336	98.3983	0.656857	down
215359_x_at	ZNF44	zinc finger protein 44	0.005871	0.0125411	325.524	441.328	0.7376	down
211064_at	ZNF493	zinc finger protein 493	0.0201603	0.0226829	26.5606	35.5544	0.747043	down
240155_x_at	ZNF493 /// ZNF738	zinc finger protein 493 /// zinc finger protein 738	0.0011848	0.00697895	273.279	389.605	0.701426	down
235618_at	ZNF507	zinc finger protein 507	0.0070742	0.0135612	59.4298	95.6854	0.621096	down
221869_at	ZNF512B	zinc finger protein 512B	0.0097501	0.0157275	48.182	71.8456	0.670632	down
244132_x_at	ZNF518A	Zinc finger protein 518A	0.0440809	0.0352713	71.6568	123.156	0.581839	down
230715_at	ZNF518B	zinc finger protein 518B	0.0059573	0.0126111	35.0559	52.8814	0.662915	down
215307_at	ZNF529	zinc finger protein 529	0.0149739	0.0195259	108.103	196.945	0.548902	down
238454_at	ZNF540	zinc finger protein 540	0.0218981	0.0237847	17.7918	29.315	0.606919	down
206648_at	ZNF571	zinc finger protein 571	0.0187709	0.0218161	30.4718	55.5872	0.54818	down
1562245_a_at	ZNF578	Zinc finger protein 578	0.0141214	0.0189793	26.9008	41.3529	0.650518	down
1558251_a_at	ZNF587	zinc finger protein 587	0.0154643	0.0197796	47.5249	71.8709	0.661254	down
235577_at	ZNF652	zinc finger protein 652	0.038536	0.0328113	28.1991	41.7078	0.67611	down
1560562_a_at	ZNF677	zinc finger protein 677	0.0007638	0.00647675	46.9865	98.9282	0.474955	down
239482_x_at	ZNF708	zinc finger protein 708	0.021202	0.0233152	83.033	109.943	0.755237	down
228988_at	ZNF711	zinc finger protein 711	0.0023929	0.00851483	24.2489	58.1541	0.416976	down
227670_at	ZNF75A	zinc finger protein 75a	0.0145309	0.0192946	465.956	668.806	0.696699	down
235231_at	ZNF789	zinc finger protein 789	0.0323077	0.0295829	142.087	182.725	0.777597	down
227101_at	ZNF800	zinc finger protein 800	0.0451064	0.0356329	32.1989	46.0295	0.699527	down
241912_at	ZNF814	zinc finger protein 814	0.031907	0.0293875	62.2916	86.4746	0.720345	down
228630_at	ZNF84	zinc finger protein 84	0.0124034	0.0176078	127.151	190.889	0.6661	down
228346_at	ZNF844	zinc finger protein 844	0.0172551	0.0208416	70.6632	107.246	0.658886	down

## Sheet: ID up
genes upregulated specifically by HSCT in ID group
probe set ID	Gene Symbol	Gene name(Description)	p-value	FDR	Geometric mean of intensities : T	Geometric mean of intensities : D	Fold change(T/D)	up/down
206765_at	KCNJ2	potassium inwardly-rectifying channel, subfamily J, member 2	1.47e-05	0.0013438	227.395	87.4202	2.60117	up
229067_at	SRGAP2P1	SLIT-ROBO Rho GTPase activating protein 2 pseudogene 1	0.001207	0.0071583	303.022	120.084	2.52341	up
235412_at	ARHGEF7	Rho guanine nucleotide exchange factor (GEF) 7	0.0034077	0.0138132	70.3276	28.4817	2.46922	up
232027_at	SYNE1	spectrin repeat containing, nuclear envelope 1	0.0005911	0.0048816	77.9311	36.7432	2.12097	up
222071_s_at	SLCO4C1	solute carrier organic anion transporter family, member 4C1	0.0167214	0.0420175	216.996	105.872	2.04962	up
228638_at	FAM76A	Family with sequence similarity 76, member A	0.0034392	0.0138946	244.898	121.944	2.00828	up
229487_at	EBF1	early B-cell factor 1	0.0172891	0.0431576	94.6398	47.1595	2.0068	up
207723_s_at	KLRC3	killer cell lectin-like receptor subfamily C, member 3	0.0003105	0.0035589	654.537	328.858	1.99033	up
225207_at	PDK4	pyruvate dehydrogenase kinase, isozyme 4	0.02652	0.0609316	369.866	187.261	1.97513	up
212589_at	RRAS2	related RAS viral (r-ras) oncogene homolog 2	0.0022913	0.0107487	292.69	150.859	1.94016	up
228964_at	PRDM1	PR domain containing 1, with ZNF domain	0.0010093	0.0066531	643.618	340.047	1.89273	up
229260_at	C5orf15	Chromosome 5 open reading frame 15	0.0067315	0.0216793	50.7042	26.8952	1.88525	up
235625_at	VPS41	vacuolar protein sorting 41 homolog (S. cerevisiae)	0.0058518	0.0196369	287.398	152.508	1.88448	up
222162_s_at	ADAMTS1	ADAM metallopeptidase with thrombospondin type 1 motif, 1	0.0003594	0.0038418	66.9495	35.7157	1.87451	up
223767_at	GPR84	G protein-coupled receptor 84	0.0037426	0.0146768	77.9045	41.751	1.86593	up
213348_at	CDKN1C	cyclin-dependent kinase inhibitor 1C (p57, Kip2)	0.0025987	0.0115525	1026.38	554.568	1.85078	up
219684_at	RTP4	receptor (chemosensory) transporter protein 4	0.019293	0.047009	373.905	204.91	1.82473	up
220444_at	ZNF557	zinc finger protein 557	0.0044883	0.0165208	41.5485	22.8368	1.81937	up
222714_s_at	LACTB2	lactamase, beta 2	0.0065159	0.0211947	224.194	123.817	1.81069	up
1554876_a_at	S100Z	S100 calcium binding protein Z	0.0132241	0.0351979	323.798	180.171	1.79717	up
229676_at	MTPAP	Mitochondrial poly(A) polymerase	0.0175163	0.0436836	322.676	180.239	1.79026	up
227045_at	ZNF614	zinc finger protein 614	0.0008286	0.0060017	71.414	39.9931	1.78566	up
227410_at	FAM43A	family with sequence similarity 43, member A	0.0006267	0.0050587	242.31	136.019	1.78143	up
211210_x_at	SH2D1A	SH2 domain protein 1A	0.0050339	0.0177695	251.81	142.358	1.76886	up
229114_at	GAB1	GRB2-associated binding protein 1	0.0202518	0.048985	71.8564	40.7639	1.76274	up
232267_at	GPR133	G protein-coupled receptor 133	0.0280018	0.0636099	100.937	57.4839	1.75591	up
211703_s_at	TM2D1	TM2 domain containing 1	0.0165017	0.0417822	508.032	289.453	1.75514	up
214553_s_at	ARPP19	cAMP-regulated phosphoprotein, 19kDa	0.0207322	0.0497342	181.893	104.406	1.74218	up
201243_s_at	ATP1B1	ATPase, Na+/K+ transporting, beta 1 polypeptide	0.0242947	0.0566449	218.786	125.591	1.74205	up
230543_at	USP9X	ubiquitin specific peptidase 9, X-linked	0.0004931	0.0044162	37.1628	21.4666	1.73119	up
229787_s_at	OGT	O-linked N-acetylglucosamine (GlcNAc) transferase (UDP-N-acetylglucosamine:polyp	0.0042611	0.0159101	331.116	192.013	1.72445	up
226685_at	SNTB2	syntrophin, beta 2 (dystrophin-associated protein A1, 59kDa, basic component 2)	0.0008198	0.0059542	462.724	268.637	1.72249	up
243386_at	CASZ1	castor zinc finger 1	0.0263764	0.0607505	43.5146	25.382	1.71439	up
218439_s_at	COMMD10	COMM domain containing 10	0.0134055	0.035538	586.126	343.368	1.70699	up
227038_at	SGMS2	sphingomyelin synthase 2	0.010951	0.0309352	283.305	166.219	1.70441	up
1565162_s_at	MGST1	microsomal glutathione S-transferase 1	0.0254894	0.058861	669.298	393.153	1.70238	up
230206_at	DOCK5	Dedicator of cytokinesis 5	0.0058037	0.0195282	290.622	171.428	1.69529	up
235400_at	FCRLA	Fc receptor-like A	0.0463315	0.0942631	73.3969	43.5685	1.68463	up
1553960_at	SNX21	sorting nexin family member 21	0.0277396	0.063231	62.3597	37.44	1.66559	up
240070_at	TIGIT	T cell immunoreceptor with Ig and ITIM domains	0.0050217	0.0177688	364.911	219.235	1.66448	up
205891_at	ADORA2B	adenosine A2b receptor	0.002212	0.0105278	85.0782	51.3493	1.65685	up
229905_at	RAP1GDS1	RAP1, GTP-GDP dissociation stimulator 1	0.0044519	0.0164181	177.409	107.312	1.65321	up
219890_at	CLEC5A	C-type lectin domain family 5, member A	0.0311953	0.0690473	177.462	107.371	1.6528	up
211744_s_at	CD58	CD58 molecule	0.0121054	0.0332554	1047.41	633.976	1.65212	up
210145_at	PLA2G4A	phospholipase A2, group IVA (cytosolic, calcium-dependent)	0.0023684	0.0109384	119.598	72.4516	1.65074	up
1552360_a_at	TIRAP	toll-interleukin 1 receptor (TIR) domain containing adaptor protein	0.0144011	0.0373576	151.585	91.9481	1.6486	up
202353_s_at	PSMD12	proteasome (prosome, macropain) 26S subunit, non-ATPase, 12	0.0063917	0.020919	401.343	244.362	1.64241	up
224329_s_at	CNFN	cornifelin	0.002302	0.010751	50.8031	30.9741	1.64018	up
213289_at	APOOL	Apolipoprotein O-like	0.0195467	0.0474962	157.316	95.9616	1.63936	up
231152_at	INO80D	INO80 complex subunit D	0.0094316	0.0275973	37.9687	23.1892	1.63734	up
225580_at	MRPL50	mitochondrial ribosomal protein L50	0.0301017	0.0670022	109.771	67.1532	1.63464	up
1553928_at	ELMOD2	ELMO/CED-12 domain containing 2	0.0132213	0.0351979	74.9473	45.9759	1.63014	up
213788_s_at	NCRNA00094	non-protein coding RNA 94	0.0075559	0.0235102	309.883	190.944	1.62289	up
220646_s_at	KLRF1	killer cell lectin-like receptor subfamily F, member 1	0.0088148	0.0262268	2819.11	1759.84	1.60191	up
212575_at	C19orf6	chromosome 19 open reading frame 6	0.00141	0.007953	115.384	72.0524	1.6014	up
205466_s_at	HS3ST1	heparan sulfate (glucosamine) 3-O-sulfotransferase 1	0.0036141	0.0142984	32.9547	20.5792	1.60135	up
209882_at	RIT1	Ras-like without CAAX 1	0.0052236	0.018293	512.088	321.468	1.59297	up
204067_at	SUOX	sulfite oxidase	0.0023443	0.0108812	107.697	67.6161	1.59278	up
204457_s_at	GAS1	growth arrest-specific 1	0.0033632	0.0136997	39.7505	24.9988	1.5901	up
230063_at	ZNF264	zinc finger protein 264	0.0057847	0.0195282	300.915	189.909	1.58452	up
213606_s_at	ARHGDIA	Rho GDP dissociation inhibitor (GDI) alpha	0.0083577	0.0252706	48.3944	30.5653	1.58331	up
228285_at	TDRD9	tudor domain containing 9	0.0100709	0.0290511	93.7514	59.2202	1.5831	up
235197_s_at	OSTM1	osteopetrosis associated transmembrane protein 1	0.0266432	0.0611525	192.149	121.877	1.57659	up
212342_at	YIPF6	Yip1 domain family, member 6	0.0186325	0.0458633	64.6216	41.0126	1.57565	up
1552552_s_at	CLEC4C	C-type lectin domain family 4, member C	0.0011832	0.0071098	48.1833	30.5972	1.57476	up
219539_at	GEMIN6	gem (nuclear organelle) associated protein 6	0.018565	0.0457396	349.38	222.762	1.5684	up
228283_at	CMC1	COX assembly mitochondrial protein homolog (S. cerevisiae)	0.0022931	0.0107487	1095.09	698.251	1.56833	up
228791_at	LOC100129502	hypothetical protein LOC100129502	0.0279249	0.0634896	386.19	246.594	1.5661	up
228728_at	C7orf58	chromosome 7 open reading frame 58	0.0348264	0.0754287	313.626	200.887	1.56121	up
226636_at	PLD1	phospholipase D1, phosphatidylcholine-specific	0.0021247	0.0103161	82.5467	52.8974	1.5605	up
219088_s_at	ZNF576	zinc finger protein 576	0.0033581	0.0136997	116.29	74.5618	1.55964	up
230623_x_at	USP28	ubiquitin specific peptidase 28	0.0068517	0.021937	224.166	144.191	1.55465	up
243934_at	ODF3B	Outer dense fiber of sperm tails 3B	0.0018852	0.0095194	99.6788	64.1622	1.55354	up
230179_at	LOC285812	hypothetical protein LOC285812	0.0281446	0.0638186	350.111	225.811	1.55046	up
1555579_s_at	PTPRM	protein tyrosine phosphatase, receptor type, M	0.0125831	0.0341082	136.249	87.9289	1.54953	up
213237_at	C16orf88	chromosome 16 open reading frame 88	0.0054909	0.0189044	41.6511	26.9445	1.54581	up
240890_at	LOC643733	hypothetical LOC643733	0.006134	0.0203621	263.338	170.703	1.54267	up
206026_s_at	TNFAIP6	tumor necrosis factor, alpha-induced protein 6	0.0040384	0.0154485	71.7128	46.5839	1.53943	up
235547_at	N4BP2L2	NEDD4 binding protein 2-like 2	0.0207823	0.0497342	81.1972	52.9353	1.5339	up
238465_at	C5orf35	chromosome 5 open reading frame 35	0.0070319	0.0222985	42.7338	27.8781	1.53288	up
239647_at	CHST13	carbohydrate (chondroitin 4) sulfotransferase 13	0.0045479	0.0166067	124.269	81.1893	1.53061	up
225046_at	LOC389831	hypothetical gene supported by AL713796	0.0171198	0.0428157	52.0121	34.0114	1.52925	up
229021_at	MCTP2	multiple C2 domains, transmembrane 2	0.0453592	0.0927834	279.329	182.922	1.52704	up
216667_at	LOC643332 /// RNASE2	similar to Nonsecretory ribonuclease precursor (Ribonuclease US) (Eosinophil-der	0.018424	0.0454344	250.595	164.249	1.5257	up
226545_at	CD109	CD109 molecule	0.0067891	0.0217892	55.838	36.5989	1.52567	up
213854_at	SYNGR1	synaptogyrin 1	0.0024006	0.0110486	169.931	111.469	1.52447	up
209644_x_at	CDKN2A	cyclin-dependent kinase inhibitor 2A (melanoma, p16, inhibits CDK4)	0.0144019	0.0373576	99.7859	65.7305	1.51811	up
1556839_s_at	SPTBN5	Spectrin, beta, non-erythrocytic 5	0.0023377	0.0108724	312.548	206.119	1.51635	up
210935_s_at	WDR1	WD repeat domain 1	0.0043704	0.0162267	91.8795	60.8946	1.50883	up
210458_s_at	TANK	TRAF family member-associated NFKB activator	0.0029815	0.0125155	51.415	34.1106	1.5073	up
205297_s_at	CD79B	CD79b molecule, immunoglobulin-associated beta	0.0300467	0.066936	846.04	562.823	1.50321	up
220231_at	C7orf16	chromosome 7 open reading frame 16	0.0024868	0.0112781	77.5229	51.6404	1.50121	up
1559921_at	PECAM1	platelet/endothelial cell adhesion molecule	0.0414554	0.0862624	231.576	154.408	1.49977	up
219860_at	LY6G5C	lymphocyte antigen 6 complex, locus G5C	0.0126905	0.0342243	80.1843	53.5111	1.49846	up
1556750_at	LOC153577	hypothetical protein LOC153577	0.0403911	0.0845297	136.278	91.3174	1.49236	up
1555214_a_at	CLEC7A	C-type lectin domain family 7, member A	0.0213623	0.0507905	222.122	149.1	1.48975	up
233969_at	IGL@	Immunoglobulin lambda locus	0.0358216	0.0769959	71.7612	48.1874	1.48921	up
224414_s_at	CARD6	caspase recruitment domain family, member 6	0.004179	0.0157365	648.561	435.798	1.48822	up
216191_s_at	TRA@ /// TRD@	T cell receptor alpha locus /// T cell receptor delta locus	0.005348	0.0186057	2265.2	1523.8	1.48654	up
202581_at	HSPA1A /// HSPA1B	heat shock 70kDa protein 1A /// heat shock 70kDa protein 1B	0.0091001	0.0269546	215.658	145.326	1.48396	up
222369_at	NAT11	N-acetyltransferase 11 (GCN5-related, putative)	0.044856	0.0919631	602.092	406.459	1.48131	up
229309_at	ADRB1	adrenergic, beta-1-, receptor	0.0042476	0.0158821	43.6605	29.5806	1.47599	up
205092_x_at	ZBTB1	zinc finger and BTB domain containing 1	0.0202749	0.0489961	42.6067	28.9221	1.47316	up
207072_at	IL18RAP	interleukin 18 receptor accessory protein	0.0032901	0.0135226	1143.65	777.018	1.47184	up
213201_s_at	TNNT1	troponin T type 1 (skeletal, slow)	0.0206225	0.049565	129.316	87.8856	1.47141	up
228252_at	PIF1	PIF1 5'-to-3' DNA helicase homolog (S. cerevisiae)	0.0324154	0.0712547	46.6387	31.7032	1.4711	up
209099_x_at	JAG1	jagged 1 (Alagille syndrome)	0.0064846	0.0211447	167.135	113.623	1.47096	up
226668_at	WDSUB1	WD repeat, sterile alpha motif and U-box domain containing 1	0.0164613	0.0417259	396.71	269.946	1.46959	up
209883_at	GLT25D2	glycosyltransferase 25 domain containing 2	0.0084305	0.0254547	85.7229	58.4792	1.46587	up
227776_at	ACER3	alkaline ceramidase 3	0.0469943	0.0951733	842.822	575.112	1.46549	up
203887_s_at	THBD	thrombomodulin	0.0098716	0.0286007	109.149	74.682	1.46152	up
205003_at	DOCK4	dedicator of cytokinesis 4	0.0110367	0.0310268	38.1778	26.1342	1.46084	up
214866_at	PLAUR	plasminogen activator, urokinase receptor	0.0191793	0.0467749	390.41	267.985	1.45683	up
218880_at	FOSL2	FOS-like antigen 2	0.0116646	0.0323024	146.527	100.665	1.45559	up
201015_s_at	JUP	junction plakoglobin	0.0077845	0.0239683	192.452	132.326	1.45437	up
228705_at	CAPN12	calpain 12	0.0080812	0.0246528	194.242	134.263	1.44673	up
205098_at	CCR1	chemokine (C-C motif) receptor 1	0.0362362	0.0774071	1872.47	1298.31	1.44223	up
204675_at	SRD5A1	steroid-5-alpha-reductase, alpha polypeptide 1 (3-oxo-5 alpha-steroid delta 4-de	0.0459958	0.0937961	318.501	221.21	1.43981	up
1556698_a_at	GPRIN3	GPRIN family member 3	0.0169678	0.0425962	92.7407	64.5035	1.43776	up
1552410_at	CLEC4F	C-type lectin domain family 4, member F	0.0239444	0.0559539	113.657	79.1139	1.43663	up
207500_at	CASP5	caspase 5, apoptosis-related cysteine peptidase	0.0367939	0.0783459	149.378	104.272	1.43258	up
1553176_at	SH2D1B	SH2 domain containing 1B	0.0193152	0.0470198	88.0358	61.6162	1.42878	up
217889_s_at	CYBRD1	cytochrome b reductase 1	0.0272752	0.0623241	80.7221	56.6604	1.42467	up
205691_at	SYNGR3	synaptogyrin 3	0.005087	0.017933	36.2439	25.6057	1.41546	up
210732_s_at	LGALS8	lectin, galactoside-binding, soluble, 8	0.014094	0.0369567	96.3824	68.4842	1.40737	up
204438_at	MRC1 /// MRC1L1	mannose receptor, C type 1 /// mannose receptor, C type 1-like 1	0.0345833	0.0750863	57.4784	40.857	1.40682	up
233072_at	NTNG2	netrin G2	0.007298	0.0228959	119.062	85.0938	1.39919	up
232422_at	A2LD1	AIG2-like domain 1	0.0093109	0.027365	86.6879	61.9664	1.39895	up
206157_at	PTX3	pentraxin-related gene, rapidly induced by IL-1 beta	0.037901	0.080252	127.121	90.9509	1.39769	up
1562020_s_at	NT5DC4	5'-nucleotidase domain containing 4	0.049629	0.0996716	32.2576	23.1476	1.39356	up
220784_s_at	UTS2	urotensin 2	0.0070092	0.0222532	738.229	533.888	1.38274	up
228042_at	ADPRH	ADP-ribosylarginine hydrolase	0.0490206	0.098674	144.855	105.791	1.36926	up
227583_at	POP4	processing of precursor 4, ribonuclease P/MRP subunit (S. cerevisiae)	0.0264578	0.0608851	119.509	87.8332	1.36063	up
213951_s_at	PSMC3IP	PSMC3 interacting protein	0.0290465	0.0653115	71.7144	52.7608	1.35924	up
1552772_at	CLEC4D	C-type lectin domain family 4, member D	0.0311913	0.0690473	485.583	357.368	1.35878	up
219599_at	EIF4B	eukaryotic translation initiation factor 4B	0.0136419	0.0360565	203.966	150.499	1.35526	up
207156_at	HIST1H2AG	histone cluster 1, H2ag	0.0378213	0.0801473	53.7786	39.728	1.35367	up
1554577_a_at	PSMD10	proteasome (prosome, macropain) 26S subunit, non-ATPase, 10	0.0417546	0.0867488	699.58	518.886	1.34823	up
1558882_at	LOC401233	similar to HIV TAT specific factor 1; cofactor required for Tat activation of HI	0.0235699	0.0553444	20.7078	15.3742	1.34692	up
228372_at	C10orf128	chromosome 10 open reading frame 128	0.021059	0.0501844	715.626	532.297	1.34441	up
205844_at	VNN1	vanin 1	0.0420948	0.0873187	217.675	163.099	1.33462	up
211719_x_at	FN1	fibronectin 1	0.0179368	0.0444417	24.6173	18.5431	1.32757	up
215719_x_at	FAS	Fas (TNF receptor superfamily, member 6)	0.0162945	0.0413762	135.177	102.012	1.32511	up
202087_s_at	CTSL1	cathepsin L1	0.0393193	0.0827923	403.577	304.972	1.32333	up
223851_s_at	TNFRSF18	tumor necrosis factor receptor superfamily, member 18	0.0407564	0.085075	82.4967	64.1661	1.28568	up
230833_at	ACRBP	acrosin binding protein	0.0481606	0.0970903	264.379	207.048	1.27689	up
210169_at	SEC14L5	SEC14-like 5 (S. cerevisiae)	0.0466123	0.094689	29.83	23.4499	1.27207	up
228572_at	GRB2	growth factor receptor-bound protein 2	0.036966	0.0786492	122.017	96.5909	1.26323	up
205547_s_at	TAGLN	transgelin	0.0397982	0.0836677	84.9847	67.2963	1.26284	up
225401_at	C1orf85	chromosome 1 open reading frame 85	0.0356153	0.0767224	297.566	236.773	1.25676	up
203290_at	HLA-DQA1	major histocompatibility complex, class II, DQ alpha 1	0.0442846	0.0910066	273.551	220.437	1.24095	up

## Sheet: ID down
genes downregulated specifically by HSCT in ID group
probe set ID	Gene Symbol	Gene name(Description)	p-value	FDR	Geometric mean of intensities : T	Geometric mean of intensities : D	Fold change(T/D)	up/down
214298_x_at	6.Sep	septin 6	0.00031	0.0035589	559.641	1077.13	0.519569	down
1559025_at	9.Sep	septin 9	0.0011357	0.0070101	40.4952	64.1526	0.631232	down
208637_x_at	ACTN1	actinin, alpha 1	0.0003444	0.0037418	356.309	775.105	0.459691	down
229036_at	ADSL /// TNRC6B	adenylosuccinate lyase /// trinucleotide repeat containing 6B	0.0312028	0.0690473	160.008	239.546	0.667964	down
232395_x_at	AGBL3	ATP/GTP binding protein-like 3	0.025277	0.0584724	12.5511	19.5724	0.641266	down
221718_s_at	AKAP13	A kinase (PRKA) anchor protein 13	0.0319535	0.0704146	223.121	340.276	0.655707	down
217893_s_at	AKIRIN1	akirin 1	0.0009427	0.006359	197.732	341.438	0.579116	down
1560689_s_at	AKT2	V-akt murine thymoma viral oncogene homolog 2	0.0103305	0.0296387	40.2138	57.6894	0.697074	down
243352_at	ALPK1	alpha-kinase 1	0.0049387	0.0175445	31.7772	48.2647	0.658395	down
233292_s_at	ANKHD1 /// ANKHD1-EIF4EBP3	ankyrin repeat and KH domain containing 1 /// ANKHD1-EIF4EBP3 readthrough transc	0.0360654	0.0772289	41.9828	54.196	0.774648	down
224687_at	ANKIB1	ankyrin repeat and IBR domain containing 1	0.0188905	0.0462407	241.851	412.559	0.586221	down
225852_at	ANKRD17	ankyrin repeat domain 17	0.0102154	0.0294359	317.563	548.045	0.579446	down
1569607_s_at	ANKRD20A1 /// ANKRD20A2 /// ANKRD20A3 /// ANKRD20A4 /// ANKRD20A5 /// C21orf81 /// LOC100132733 /// LOC644339	ankyrin repeat domain 20 family, member A1 /// ankyrin repeat domain 20 family,	0.028132	0.0638186	44.5407	77.4437	0.575136	down
220940_at	ANKRD36B	ankyrin repeat domain 36B	0.0252213	0.0583945	90.5365	172.768	0.524035	down
223111_x_at	ARID4B	AT rich interactive domain 4B (RBP1-like)	0.0053466	0.0186057	219.217	398.467	0.550151	down
201879_at	ARIH1	ariadne homolog, ubiquitin-conjugating enzyme E2 binding protein, 1 (Drosophila)	0.0499953	0.10018	103.988	157.319	0.661003	down
202672_s_at	ATF3	activating transcription factor 3	0.0142441	0.0372031	180.869	437.483	0.413431	down
219870_at	ATF7IP2	activating transcription factor 7 interacting protein 2	0.0012378	0.0072609	238.122	400.502	0.594558	down
208442_s_at	ATM	ataxia telangiectasia mutated	0.0210107	0.0501796	182.109	348.922	0.521917	down
209281_s_at	ATP2B1	ATPase, Ca++ transporting, plasma membrane 1	0.0106845	0.0303912	174.339	319.824	0.545108	down
214594_x_at	ATP8B1	ATPase, class I, type 8B, member 1	0.0007374	0.0055535	214.181	392.342	0.545903	down
203231_s_at	ATXN1	ataxin 1	0.0402071	0.0843268	110.809	187.032	0.592463	down
207798_s_at	ATXN2L	ataxin 2-like	0.0069194	0.0220291	104.526	165.443	0.631799	down
228787_s_at	BCAS4	breast carcinoma amplified sequence 4	0.0399883	0.0840008	95.9502	133.368	0.719442	down
219528_s_at	BCL11B	B-cell CLL/lymphoma 11B (zinc finger protein)	0.0001066	0.0023233	679.607	1376.47	0.493731	down
207005_s_at	BCL2	B-cell CLL/lymphoma 2	0.0408302	0.085162	38.8785	53.0868	0.732357	down
231873_at	BMPR2	bone morphogenetic protein receptor, type II (serine/threonine kinase)	0.0019047	0.0095632	69.326	149.581	0.46347	down
244165_at	C10orf18	chromosome 10 open reading frame 18	0.00038	0.0039198	191.717	354.213	0.541247	down
228193_s_at	C13orf15	Chromosome 13 open reading frame 15	0.020402	0.0492136	29.5236	49.8228	0.592572	down
1554661_s_at	C1orf71	chromosome 1 open reading frame 71	0.0004222	0.0040806	83.6029	144.61	0.578128	down
232500_at	C20orf74	chromosome 20 open reading frame 74	0.0105	0.0300599	123.414	203.943	0.605141	down
219980_at	C4orf29	chromosome 4 open reading frame 29	0.0099039	0.0286629	60.8555	92.061	0.661034	down
1554229_at	C5orf41	chromosome 5 open reading frame 41	0.0041678	0.0157167	122.662	202.276	0.606406	down
224533_s_at	C6orf142	Chromosome 6 open reading frame 142	0.0167059	0.0420175	26.1576	42.7769	0.61149	down
210109_at	C7orf54	chromosome 7 open reading frame 54	0.0007624	0.0056508	45.1829	81.3153	0.555651	down
220038_at	C8orf44 /// SGK3	chromosome 8 open reading frame 44 /// serum/glucocorticoid regulated kinase fam	0.001619	0.0086279	183.543	341.171	0.537978	down
223006_s_at	C9orf5	chromosome 9 open reading frame 5	0.0021748	0.0104024	471.202	788.235	0.597794	down
232489_at	CCDC76	coiled-coil domain containing 76	0.0334135	0.0730851	65.491	118.068	0.554691	down
1570571_at	CCDC91	Coiled-coil domain containing 91	0.0020687	0.0100997	51.3474	112.114	0.457993	down
217523_at	CD44	CD44 molecule (Indian blood group)	5.44e-05	0.001678	349.161	909.083	0.38408	down
242974_at	CD47	CD47 molecule	0.040727	0.085075	258.689	359.125	0.720332	down
230489_at	CD5	CD5 molecule	0.0016538	0.0086816	238.221	378.805	0.628874	down
209795_at	CD69	CD69 molecule	0.0001905	0.0029863	912.886	2028.07	0.450125	down
204440_at	CD83	CD83 molecule	0.000431	0.0040806	408.928	827.666	0.494073	down
204154_at	CDO1	cysteine dioxygenase, type I	0.0125614	0.0341082	14.5072	21.2219	0.683596	down
210701_at	CFDP1	craniofacial development protein 1	0.0001249	0.0023523	47.1099	92.784	0.507737	down
232879_at	CRTC3	CREB regulated transcription coactivator 3	0.0130369	0.034843	65.5656	124.863	0.525101	down
208866_at	CSNK1A1	casein kinase 1, alpha 1	0.0448888	0.0919631	275.399	397.537	0.692763	down
223679_at	CTNNB1	catenin (cadherin-associated protein), beta 1, 88kDa	0.0087381	0.0261453	756.744	1325.2	0.57104	down
242268_at	CUGBP2	CUG triplet repeat, RNA binding protein 2	0.0014992	0.0082642	663.51	1238.17	0.535879	down
237040_at	CWF19L2	CWF19-like 2, cell cycle control (S. pombe)	0.0203204	0.0490614	208.153	327.725	0.635146	down
211919_s_at	CXCR4	chemokine (C-X-C motif) receptor 4	0.0059213	0.0197949	848.867	1972.25	0.430405	down
214131_at	CYorf15B	chromosome Y open reading frame 15B	0.0038767	0.015012	61.8303	179.231	0.344975	down
243318_at	DCAF8	DDB1 and CUL4 associated factor 8	0.0010258	0.006698	256.857	466.327	0.550808	down
244154_at	DDHD1	DDHD domain containing 1	0.0037481	0.0146768	29.6691	56.5108	0.525017	down
205001_s_at	DDX3Y	DEAD (Asp-Glu-Ala-Asp) box polypeptide 3, Y-linked	0.0009312	0.0063427	477.307	879.629	0.542623	down
1570415_at	DDX52	DEAD (Asp-Glu-Ala-Asp) box polypeptide 52	0.0078239	0.0239997	14.3498	25.5512	0.561608	down
211272_s_at	DGKA	diacylglycerol kinase, alpha 80kDa	0.0001236	0.0023523	83.436	164.717	0.506541	down
223139_s_at	DHX36	DEAH (Asp-Glu-Ala-His) box polypeptide 36	0.0351592	0.0760253	703.642	1110.93	0.63338	down
200664_s_at	DNAJB1	DnaJ (Hsp40) homolog, subfamily B, member 1	0.0003754	0.0039198	380.007	697.306	0.544964	down
222850_s_at	DNAJB14	DnaJ (Hsp40) homolog, subfamily B, member 14	0.0104944	0.0300599	125.034	227.332	0.550007	down
211478_s_at	DPP4	dipeptidyl-peptidase 4	0.0087022	0.0260968	39.8924	77.3573	0.51569	down
202971_s_at	DYRK2	dual-specificity tyrosine-(Y)-phosphorylation regulated kinase 2	0.008048	0.0245798	118.811	281.263	0.42242	down
1556607_at	EHD4	EH-domain containing 4	0.0037545	0.0146802	18.7683	33.9171	0.553357	down
232587_at	EML4	echinoderm microtubule associated protein like 4	0.0020427	0.0100029	74.5165	130.961	0.569	down
213579_s_at	EP300	E1A binding protein p300	0.0433827	0.0895	271.398	411.994	0.658744	down
219759_at	ERAP2	endoplasmic reticulum aminopeptidase 2	0.0071652	0.0225861	414.767	615.863	0.673473	down
215606_s_at	ERC1	ELKS/RAB6-interacting/CAST family member 1	0.0184229	0.0454344	53.7435	80.088	0.671055	down
205767_at	EREG	epiregulin	0.0049758	0.0176348	19.5435	30.6874	0.636856	down
203886_s_at	FBLN2	fibulin 2	0.018983	0.0463815	37.8953	59.8068	0.633629	down
239223_s_at	FBXL20	F-box and leucine-rich repeat protein 20	0.0130382	0.034843	74.197	109.19	0.679519	down
1559096_x_at	FBXO9	F-box protein 9	0.0024175	0.0111071	117.528	192.455	0.610678	down
218751_s_at	FBXW7	F-box and WD repeat domain containing 7	0.0175714	0.0437799	266.015	413.949	0.642628	down
203562_at	FEZ1	fasciculation and elongation protein zeta 1 (zygin I)	0.0042075	0.0158214	50.4172	78.4886	0.642351	down
221345_at	FFAR2	free fatty acid receptor 2	0.0006231	0.0050587	73.5256	129.667	0.567034	down
210299_s_at	FHL1	four and a half LIM domains 1	0.0129666	0.0347568	23.4506	34.5115	0.679502	down
210786_s_at	FLI1	Friend leukemia virus integration 1	0.0496905	0.0997195	300.746	373.341	0.805552	down
210655_s_at	FOXO3 /// FOXO3B	forkhead box O3 /// forkhead box O3B pseudogene	0.0025385	0.011406	40.5187	62.8306	0.644888	down
208782_at	FSTL1	follistatin-like 1	0.0078309	0.0239997	40.5472	64.3176	0.630422	down
1559101_at	FYN	FYN oncogene related to SRC, FGR, YES	0.0058352	0.019606	193.013	274.837	0.702281	down
239930_at	GALNT2	UDP-N-acetyl-alpha-D-galactosamine:polypeptide N-acetylgalactosaminyltransferase	0.004936	0.0175445	130.172	200.595	0.648926	down
233937_at	GGNBP2	gametogenetin binding protein 2	0.000196	0.0030209	22.0234	42.1448	0.522566	down
228173_at	GNAS	GNAS complex locus	0.003495	0.0139747	95.8869	176.799	0.54235	down
227262_at	HAPLN3	hyaluronan and proteoglycan link protein 3	0.0014415	0.0080451	129.463	237.184	0.545832	down
211699_x_at	HBA1 /// HBA2	hemoglobin, alpha 1 /// hemoglobin, alpha 2	0.0025847	0.011516	6060.09	11057.4	0.548056	down
209116_x_at	HBB	hemoglobin, beta	0.0140046	0.0368315	10198.2	15624.6	0.652702	down
206834_at	HBD	hemoglobin, delta	0.0039234	0.0151458	99.768	174.847	0.570603	down
203821_at	HBEGF	heparin-binding EGF-like growth factor	0.0007527	0.0056209	108.872	183.989	0.591731	down
204848_x_at	HBG1 /// HBG2	hemoglobin, gamma A /// hemoglobin, gamma G	0.0004298	0.0040806	186.335	321.172	0.580174	down
215780_s_at	hCG_1644608 /// SET	SET translocation (myeloid leukemia-associated) pseudogene /// SET nuclear oncog	0.0103057	0.0295996	1689.4	2710.41	0.623299	down
242349_at	HECTD1	HECT domain containing 1	0.0358985	0.0769959	73.9254	113.599	0.650759	down
1558699_a_at	HERPUD2	HERPUD family member 2	0.0116976	0.0323024	85.866	173.193	0.495782	down
227614_at	HKDC1	hexokinase domain containing 1	0.0064185	0.020955	28.67	46.6135	0.615059	down
213470_s_at	HNRNPH1	heterogeneous nuclear ribonucleoprotein H1 (H)	0.016563	0.0418974	148.615	232.253	0.639883	down
224359_s_at	HOOK3	hook homolog 3 (Drosophila)	0.0207607	0.0497342	42.4648	60.5646	0.701149	down
200806_s_at	HSPD1	heat shock 60kDa protein 1 (chaperonin)	0.0033483	0.0136997	247.449	402.578	0.614661	down
214453_s_at	IFI44	interferon-induced protein 44	0.0298738	0.0667427	989.133	1336.53	0.740075	down
204439_at	IFI44L	interferon-induced protein 44-like	0.0217998	0.0517379	574.657	858.903	0.669059	down
204747_at	IFIT3	interferon-induced protein with tetratricopeptide repeats 3	0.0106505	0.0303912	324.789	467.84	0.694232	down
211506_s_at	IL8	interleukin 8	0.0086155	0.025866	85.6738	394.545	0.217146	down
1552610_a_at	JAK1	Janus kinase 1	0.0294454	0.0658909	184.546	232.032	0.795345	down
1562031_at	JAK2	Janus kinase 2	0.0479089	0.09673	61.913	97.2854	0.636406	down
201488_x_at	KHDRBS1	KH domain containing, RNA binding, signal transduction associated 1	0.0431076	0.0890018	830.163	1273.35	0.651953	down
215268_at	KIAA0754	KIAA0754	0.0289008	0.0650943	61.8156	89.7115	0.689048	down
215750_at	KIAA1659	KIAA1659 protein	0.005506	0.0189318	37.8709	59.5908	0.635516	down
208960_s_at	KLF6	Kruppel-like factor 6	0.0188494	0.0461828	819.092	1780.29	0.46009	down
200923_at	LGALS3BP	lectin, galactoside-binding, soluble, 3 binding protein	0.0262005	0.0603978	210.894	274.448	0.768428	down
231866_at	LNPEP	leucyl/cystinyl aminopeptidase	0.0476336	0.0963209	190.608	374.427	0.509067	down
235060_at	LOC100190986	hypothetical LOC100190986	8.81e-05	0.0021621	292.508	662.234	0.441698	down
213089_at	LOC100272216	hypothetical LOC100272216	0.0007455	0.0055828	239.566	454.02	0.527655	down
1555363_s_at	LOC284440	hypothetical LOC284440	0.0014285	0.0080062	26.5461	45.9882	0.577237	down
217506_at	LOC339290	Hypothetical LOC339290	0.008501	0.0256349	134.929	205.049	0.658032	down
231024_at	LOC572558	hypothetical locus LOC572558	0.0089466	0.0265296	65.2261	118.848	0.548819	down
1568763_s_at	LOC728613 /// PDCD6	programmed cell death 6 pseudogene /// programmed cell death 6	0.0441293	0.0907578	350.108	468.96	0.746563	down
217667_at	LOC729799	SEC14-like 1 pseudogene	0.0036162	0.0142984	79.6223	115.809	0.687529	down
1557360_at	LRPPRC	leucine-rich PPR-motif containing	0.0497689	0.0998013	174.29	251.486	0.693041	down
239379_at	LRRFIP1	Leucine rich repeat (in FLII) interacting protein 1	0.0019925	0.009855	278.479	470.839	0.591453	down
227308_x_at	LTBP3	latent transforming growth factor beta binding protein 3	0.0015057	0.0082642	134.903	234.243	0.575909	down
215967_s_at	LY9	lymphocyte antigen 9	0.0003319	0.0036969	203.108	387.044	0.524767	down
36711_at	MAFF	v-maf musculoaponeurotic fibrosarcoma oncogene homolog F (avian)	0.0052226	0.018293	190.664	304.269	0.626632	down
1558111_at	MBNL1	muscleblind-like (Drosophila)	0.0002292	0.0030843	302.012	606.611	0.497867	down
232138_at	MBNL2	Muscleblind-like 2 (Drosophila)	0.0088673	0.0263534	51.5638	105.971	0.486585	down
210136_at	MBP	myelin basic protein	0.0382745	0.0808492	978.405	1502.2	0.651314	down
225742_at	MDM4	Mdm4 p53 binding protein homolog (mouse)	0.0268053	0.0614713	67.9809	93.5556	0.726637	down
1569484_s_at	MDN1	MDN1, midasin homolog (yeast)	0.0007249	0.005475	32.7784	63.0189	0.520136	down
201986_at	MED13	mediator complex subunit 13	0.0063863	0.020919	579.421	1001.61	0.57849	down
216109_at	MED13L	Mediator complex subunit 13-like	0.0001786	0.0028494	48.3159	112.951	0.42776	down
213899_at	METAP2	methionyl aminopeptidase 2	0.0494031	0.0993685	106.12	167.886	0.632095	down
235409_at	MGA	MAX gene associated	0.004859	0.0174542	54.5263	108.326	0.503353	down
1560145_at	MKLN1	Muskelin 1, intracellular mediator containing kelch motifs	0.000146	0.0025626	155.429	337.906	0.459977	down
212078_s_at	MLL	myeloid/lymphoid or mixed-lineage leukemia (trithorax homolog, Drosophila)	0.0095664	0.0278352	86.634	145.016	0.59741	down
207550_at	MPL	myeloproliferative leukemia virus oncogene	0.0428318	0.0886394	34.4778	55.3645	0.622742	down
238451_at	MPP7	membrane protein, palmitoylated 7 (MAGUK p55 subfamily member 7)	0.0003783	0.0039198	27.4446	48.2835	0.568404	down
232071_at	MRPL19	Mitochondrial ribosomal protein L19	0.0053863	0.0186646	15.9521	23.7272	0.672312	down
230214_at	MRVI1	murine retrovirus integration site 1 homolog	0.0144163	0.0373584	38.6659	54.5285	0.709096	down
212251_at	MTDH	metadherin	0.0336938	0.0736375	1112.21	1824.05	0.609746	down
202086_at	MX1	myxovirus (influenza virus) resistance 1, interferon-inducible protein p78 (mous	0.0052195	0.018293	1671.75	2385.48	0.700804	down
204994_at	MX2	myxovirus (influenza virus) resistance 2 (mouse)	0.0315486	0.0696961	863.775	1114.98	0.774702	down
201959_s_at	MYCBP2	MYC binding protein 2	0.0025071	0.0113033	922.687	1630.27	0.565972	down
231996_at	N4BP2	NEDD4 binding protein 2	0.0460826	0.0939008	29.5485	43.8715	0.673525	down
217739_s_at	NAMPT	nicotinamide phosphoribosyltransferase	0.0091423	0.0270494	717.505	1141.97	0.628303	down
1558515_at	NCRNA00182	non-protein coding RNA 182	0.0047019	0.0170283	56.1503	106.635	0.526567	down
234989_at	NEAT1	nuclear paraspeckle assembly transcript 1 (non-protein coding)	0.0003551	0.0038112	1110.65	1965.84	0.564978	down
210556_at	NFATC3	nuclear factor of activated T-cells, cytoplasmic, calcineurin-dependent 3	0.0056293	0.0192063	38.778	69.7523	0.555938	down
223217_s_at	NFKBIZ	nuclear factor of kappa light polypeptide gene enhancer in B-cells inhibitor, ze	0.018707	0.045933	209.473	327.228	0.640145	down
207705_s_at	NINL	ninein-like	0.0061601	0.0203621	49.2918	74.222	0.664113	down
215338_s_at	NKTR	natural killer-tumor recognition sequence	0.0462976	0.0942631	146.216	242.981	0.601759	down
205005_s_at	NMT2	N-myristoyltransferase 2	0.0029837	0.0125155	91.6478	196.984	0.465255	down
212582_at	OSBPL8	oxysterol binding protein-like 8	0.015174	0.0389412	1538.76	2223.98	0.691896	down
225626_at	PAG1	phosphoprotein associated with glycosphingolipid microdomains 1	0.0049068	0.0175445	1286.34	2228.04	0.577341	down
1556277_a_at	PAPD4	PAP associated domain containing 4	0.0008757	0.0061106	35.1817	73.2217	0.480482	down
230536_at	PBX4	pre-B-cell leukemia homeobox 4	0.0121422	0.0333219	130.594	191.982	0.68024	down
213517_at	PCBP2	poly(rC) binding protein 2	0.0056911	0.0193673	57.3576	123.512	0.464387	down
205559_s_at	PCSK5	proprotein convertase subtilisin/kexin type 5	0.0299788	0.0668409	291.869	442.646	0.659374	down
224046_s_at	PDE7A	phosphodiesterase 7A	0.0008934	0.0062163	27.8719	60.4084	0.461391	down
208612_at	PDIA3	protein disulfide isomerase family A, member 3	0.0416445	0.0865879	755.282	1245.57	0.606373	down
213684_s_at	PDLIM5	PDZ and LIM domain 5	0.0338736	0.0739695	43.4375	65.3325	0.664868	down
242832_at	PER1	period homolog 1 (Drosophila)	0.0456549	0.0932443	129.924	203.267	0.639179	down
203691_at	PI3	peptidase inhibitor 3, skin-derived	0.0037993	0.0148083	28.4571	51.0664	0.557258	down
226094_at	PIK3C2A	phosphoinositide-3-kinase, class 2, alpha polypeptide	0.0008189	0.0059542	63.7386	117.001	0.544771	down
204269_at	PIM2	pim-2 oncogene	0.010009	0.028904	292.051	541.475	0.539361	down
222826_at	PLDN	pallidin homolog (mouse)	0.0041467	0.0156594	292.373	593.492	0.492632	down
233458_at	POLR3E	polymerase (RNA) III (DNA directed) polypeptide E (80kD)	0.0426698	0.0884423	56.5445	69.7579	0.810582	down
209433_s_at	PPAT	phosphoribosyl pyrophosphate amidotransferase	0.0354953	0.0765647	103.988	173.813	0.598273	down
201602_s_at	PPP1R12A	protein phosphatase 1, regulatory (inhibitor) subunit 12A	0.002714	0.0118531	199.047	338.987	0.587182	down
209678_s_at	PRKCI	protein kinase C, iota	0.0006943	0.0053849	79.8884	198.554	0.402351	down
235987_at	PRKXP1	protein kinase, X-linked, pseudogene 1	0.0010033	0.0066328	193.632	355.187	0.545155	down
214545_s_at	PROSC	proline synthetase co-transcribed homolog (bacterial)	0.0144736	0.0374702	95.3441	150.755	0.632445	down
1554997_a_at	PTGS2	prostaglandin-endoperoxide synthase 2 (prostaglandin G/H synthase and cyclooxyge	0.0021681	0.0104024	21.8404	54.3636	0.401746	down
241938_at	QKI	Quaking homolog, KH domain RNA binding (mouse)	0.0161643	0.0411243	307.409	476.745	0.644809	down
221830_at	RAP2A	RAP2A, member of RAS oncogene family	0.0179376	0.0444417	153.858	300.85	0.51141	down
1554999_at	RASGEF1B	RasGEF domain family, member 1B	0.0028293	0.0121227	47.9391	119.012	0.40281	down
239635_at	RBM14	RNA binding motif protein 14	0.0043455	0.016157	86.517	166.749	0.518844	down
1557081_at	RBM25	RNA binding motif protein 25	0.0116819	0.0323024	180.358	342.351	0.526823	down
231716_at	RC3H2	ring finger and CCCH-type zinc finger domains 2	0.0122716	0.0335728	276.11	483.029	0.571622	down
202988_s_at	RGS1	regulator of G-protein signaling 1	0.0391474	0.0825615	88.01	131.055	0.671548	down
226310_at	RICTOR	RPTOR independent companion of MTOR, complex 2	0.0011859	0.0071098	80.0394	138.614	0.577428	down
226433_at	RNF157	ring finger protein 157	0.0013326	0.0076632	112.125	196.993	0.569185	down
226999_at	RNPC3	RNA-binding region (RNP1, RRM) containing 3	0.0342774	0.0745442	48.0529	85.3999	0.562681	down
236621_at	RPS27	ribosomal protein S27	0.0001169	0.0023523	31.208	71.4237	0.436942	down
1559126_at	RRP12	ribosomal RNA processing 12 homolog (S. cerevisiae)	0.0028604	0.0121989	61.4415	91.8488	0.668942	down
212018_s_at	RSL1D1	ribosomal L1 domain containing 1	0.0054343	0.0187582	882.875	1424.09	0.619956	down
225770_at	RSPRY1	ring finger and SPRY domain containing 1	0.0013972	0.0079145	134.797	277.453	0.485837	down
1555618_s_at	SAE1	SUMO1 activating enzyme subunit 1	0.0067277	0.0216793	131.313	217.487	0.603775	down
1554089_s_at	SBDS /// SBDSP	Shwachman-Bodian-Diamond syndrome /// Shwachman-Bodian-Diamond syndrome pseudoge	0.0239033	0.0559539	489	750.204	0.651823	down
1569225_a_at	SCML4	sex comb on midleg-like 4 (Drosophila)	0.000788	0.0057548	192.497	486.73	0.39549	down
211769_x_at	SERINC3	serine incorporator 3	0.0186555	0.0458773	441.042	764.662	0.57678	down
222575_at	SETD5	SET domain containing 5	0.0139811	0.0368315	202.474	284.124	0.712626	down
210172_at	SF1	splicing factor 1	0.0058047	0.0195282	85.6829	172.316	0.497242	down
217608_at	SFRS12IP1	SFRS12-interacting protein 1	0.010942	0.0309352	90.7208	182.332	0.497559	down
238929_at	SFRS2B	splicing factor, arginine/serine-rich 2B	0.0060511	0.0201273	104.736	177.082	0.591452	down
212266_s_at	SFRS5	splicing factor, arginine/serine-rich 5	0.0199981	0.0484597	3998.17	5924.98	0.674799	down
208078_s_at	SIK1	salt-inducible kinase 1	0.0053165	0.0185692	206.516	379.538	0.544124	down
1559034_at	SIRPB2	signal-regulatory protein beta 2	0.0367477	0.0783104	182.925	227.568	0.803825	down
230494_at	SLC20A1	Solute carrier family 20 (phosphate transporter), member 1	0.0123086	0.0336393	204.576	352.188	0.580872	down
205097_at	SLC26A2	solute carrier family 26 (sulfate transporter), member 2	0.0361877	0.0774071	143.647	230.83	0.622308	down
205592_at	SLC4A1	solute carrier family 4, anion exchanger, member 1 (erythrocyte membrane protein	0.0239187	0.0559539	103.586	146.916	0.705071	down
203579_s_at	SLC7A6	solute carrier family 7 (cationic amino acid transporter, y+ system), member 6	0.0019681	0.0097983	97.0748	156.76	0.619258	down
201072_s_at	SMARCC1	SWI/SNF related, matrix associated, actin dependent regulator of chromatin, subf	0.0478732	0.09673	119.964	197.581	0.607165	down
242146_at	SNRPA1	Small nuclear ribonucleoprotein polypeptide A'	0.0002233	0.0030832	585.505	1089.58	0.537367	down
1556601_a_at	SPATA13	Spermatogenesis associated 13	0.0056823	0.0193622	352.168	529.415	0.665203	down
200672_x_at	SPTBN1	spectrin, beta, non-erythrocytic 1	0.0093597	0.0274475	103.365	147.156	0.702415	down
207983_s_at	STAG2	stromal antigen 2	0.0187426	0.0459636	91.901	201.593	0.455875	down
AFFX-HUMISGF3A/M97935_MA_at	STAT1	signal transducer and activator of transcription 1, 91kDa	0.0333	0.072897	165.283	227.653	0.726028	down
205170_at	STAT2	signal transducer and activator of transcription 2, 113kDa	0.0392395	0.0826899	74.2837	93.7861	0.792055	down
243797_at	STK17B	serine/threonine kinase 17b	0.0045195	0.0165486	100.864	154.527	0.652731	down
1553117_a_at	STK38	serine/threonine kinase 38	0.0078764	0.0240944	261.029	487.166	0.535811	down
222557_at	STMN3	stathmin-like 3	0.001182	0.0071098	513.009	919.357	0.558009	down
1558002_at	STRAP	Serine/threonine kinase receptor associated protein	0.0141878	0.0371292	81.0027	147.64	0.548652	down
215505_s_at	STRN3	striatin, calmodulin binding protein 3	0.001847	0.0093801	35.806	62.6285	0.57172	down
222708_s_at	STX17	syntaxin 17	0.0035399	0.0140905	113.18	239.815	0.471949	down
217704_x_at	SUZ12P	Suppressor of zeste 12 homolog pseudogene	0.0042311	0.0158651	22.1465	35.3287	0.626869	down
244023_at	SYK	spleen tyrosine kinase	0.0475607	0.0962469	163.709	272.611	0.600522	down
1554690_a_at	TACC1	transforming, acidic coiled-coil containing protein 1	0.0077452	0.023875	182.133	309.344	0.588773	down
227891_s_at	TAF15	TAF15 RNA polymerase II, TATA box binding protein (TBP)-associated factor, 68kDa	0.0170429	0.042743	216.012	366.238	0.589813	down
235154_at	TAF3	TAF3 RNA polymerase II, TATA box binding protein (TBP)-associated factor, 140kDa	0.0330586	0.0724883	76.3672	119.858	0.637149	down
226037_s_at	TAF9B	TAF9B RNA polymerase II, TATA box binding protein (TBP)-associated factor, 31kDa	0.0365628	0.0780419	114.594	153.686	0.745638	down
221428_s_at	TBL1XR1	transducin (beta)-like 1 X-linked receptor 1	0.0007047	0.0054465	91.3974	159.941	0.571445	down
203742_s_at	TDG	thymine-DNA glycosylase	0.0290898	0.0653534	66.8061	103.241	0.647089	down
201109_s_at	THBS1	thrombospondin 1	0.0237829	0.0557951	50.8298	65.8225	0.772225	down
1553118_at	THEM4	thioesterase superfamily member 4	4.25e-05	0.0015763	100.812	263.409	0.382721	down
221060_s_at	TLR4	toll-like receptor 4	0.0358838	0.0769959	148.996	185.609	0.802743	down
222787_s_at	TMEM106B	transmembrane protein 106B	0.0106223	0.0303773	47.7866	129.589	0.368755	down
211967_at	TMEM123	transmembrane protein 123	0.0042173	0.0158358	2552.91	3773.08	0.67661	down
202643_s_at	TNFAIP3	tumor necrosis factor, alpha-induced protein 3	0.0024464	0.0111886	476.562	1008.22	0.472677	down
1552648_a_at	TNFRSF10A	tumor necrosis factor receptor superfamily, member 10a	0.0095759	0.0278352	87.8821	133.088	0.660329	down
211841_s_at	TNFRSF25	tumor necrosis factor receptor superfamily, member 25	0.0028218	0.0121227	220.237	433.364	0.508203	down
243423_at	TNIP1	TNFAIP3 interacting protein 1	0.0227636	0.0536412	433.505	554.261	0.782131	down
240265_at	TRAF3IP3	TRAF3 interacting protein 3	0.0058899	0.0197148	194.889	480.665	0.405458	down
234013_at	TRD@	T cell receptor delta locus	0.0298844	0.0667427	106.719	152.186	0.701243	down
223283_s_at	TSHZ1	teashirt zinc finger homeobox 1	0.0012432	0.0072753	235.551	463.713	0.507968	down
208661_s_at	TTC3	tetratricopeptide repeat domain 3	0.0112487	0.0315225	133.622	281.624	0.474469	down
208195_at	TTN	titin	0.0120646	0.0331963	49.4642	80.7005	0.612935	down
239742_at	TULP4	Tubby like protein 4	0.0083046	0.0251894	176.519	309.216	0.570859	down
236107_at	UBE2Z	ubiquitin-conjugating enzyme E2Z	0.000946	0.0063651	118.166	198.407	0.595573	down
217100_s_at	UBXN7	UBX domain protein 7	0.001874	0.0094809	122.731	201.896	0.607896	down
1563497_at	USP25	ubiquitin specific peptidase 25	0.0057368	0.0194479	57.4805	117.613	0.488727	down
206624_at	USP9Y	ubiquitin specific peptidase 9, Y-linked	0.0076359	0.0235964	60.7665	89.8356	0.676419	down
228480_at	VAPA	VAMP (vesicle-associated membrane protein)-associated protein A, 33kDa	0.0330994	0.0725178	158.198	240.909	0.656674	down
220221_at	VPS13D	vacuolar protein sorting 13 homolog D (S. cerevisiae)	0.017113	0.0428157	76.9544	129.065	0.596245	down
1560112_at	WDFY2	WD repeat and FYVE domain containing 2	0.00197	0.0097983	135.06	227.277	0.594256	down
229141_at	WDR33	WD repeat domain 33	0.0010023	0.0066328	165.225	280.268	0.589527	down
202940_at	WNK1	WNK lysine deficient protein kinase 1	0.0133553	0.0354915	33.2203	54.0643	0.614458	down
219221_at	ZBTB38	zinc finger and BTB domain containing 38	0.0278592	0.0633946	237.184	500.027	0.474342	down
1554638_at	ZFYVE16	zinc finger, FYVE domain containing 16	0.0106841	0.0303912	38.6018	64.3979	0.599426	down
210281_s_at	ZMYM2	zinc finger, MYM-type 2	0.002493	0.0112781	46.5011	85.5266	0.543703	down
1559881_s_at	ZNF12	zinc finger protein 12	0.0129435	0.03473	48.1564	93.8786	0.512964	down
203319_s_at	ZNF148	zinc finger protein 148	0.0029061	0.0123068	62.0928	135.955	0.456716	down
222619_at	ZNF281	zinc finger protein 281	0.0037614	0.0146855	252.695	478.622	0.527964	down
212368_at	ZNF292	zinc finger protein 292	0.0081645	0.0248756	209.318	379.615	0.551397	down
236267_at	ZNF346	zinc finger protein 346	0.0244549	0.0569683	141.569	224.578	0.630375	down
206829_x_at	ZNF430	zinc finger protein 430	0.0272947	0.0623241	179.194	320.477	0.559148	down
217627_at	ZNF573	zinc finger protein 573	0.0055459	0.0190386	161.442	245.978	0.656325	down
206059_at	ZNF91	zinc finger protein 91	0.0049437	0.0175445	841.375	1902.04	0.442355	down

## Sheet: up shared in IF and ID group 
shared genes upregulated by HSCT in IF and ID groups
probe set ID	Gene Symbol	Gene name(Description)	Fold change(T/D)in IF	Up/down in IF	Fold change(T/D)in ID	Up/down in ID
1553681_a_at	PRF1	perforin 1 (pore forming protein)	3.18439	up	1.79647	up
210321_at	GZMH	granzyme H (cathepsin G-like 2, protein h-CCPX)	2.98543	up	2.28236	up
212070_at	GPR56	G protein-coupled receptor 56	2.76409	up	2.04637	up
202458_at	PRSS23	protease, serine, 23	2.69429	up	2.41731	up
205495_s_at	GNLY	granulysin	2.64993	up	2.1685	up
220684_at	TBX21	T-box 21	2.52607	up	2.13134	up
206785_s_at	KLRC1 /// KLRC2	killer cell lectin-like receptor subfamily C, member 1 /// killer cell lectin-li	2.49728	up	2.31901	up
213849_s_at	PPP2R2B	protein phosphatase 2 (formerly 2A), regulatory subunit B, beta isoform	2.39134	up	2.31965	up
223836_at	FGFBP2	fibroblast growth factor binding protein 2	2.38529	up	1.85986	up
210164_at	GZMB	granzyme B (granzyme 2, cytotoxic T-lymphocyte-associated serine esterase 1)	2.36028	up	1.66609	up
207795_s_at	KLRD1	killer cell lectin-like receptor subfamily D, member 1	2.33324	up	2.37967	up
210354_at	IFNG	interferon, gamma	2.30384	up	2.46547	up
226625_at	TGFBR3	transforming growth factor, beta receptor III	2.29244	up	1.62082	up
219529_at	CLIC3	chloride intracellular channel 3	2.25817	up	2.06479	up
204256_at	ELOVL6	ELOVL family member 6, elongation of long chain fatty acids (FEN1/Elo2, SUR4/Elo	2.23537	up	2.43927	up
215894_at	PTGDR	prostaglandin D2 receptor (DP)	2.2234	up	2.00623	up
219521_at	B3GAT1	beta-1,3-glucuronyltransferase 1 (glucuronosyltransferase P)	2.21122	up	1.96209	up
206486_at	LAG3	lymphocyte-activation gene 3	2.20977	up	2.09271	up
1555486_a_at	PRR5L	proline rich 5 like	2.20601	up	1.70842	up
219386_s_at	SLAMF8	SLAM family member 8	2.18984	up	2.30921	up
229215_at	ASCL2	achaete-scute complex homolog 2 (Drosophila)	2.17631	up	1.99481	up
1553177_at	SH2D1B	SH2 domain containing 1B	2.17485	up	1.71594	up
238600_at	JAKMIP1	janus kinase and microtubule interacting protein 1	2.16548	up	2.19314	up
221272_s_at	C1orf21	chromosome 1 open reading frame 21	2.12041	up	2.08391	up
223168_at	RHOU	ras homolog gene family, member U	2.10491	up	1.83066	up
205488_at	GZMA	granzyme A (granzyme 1, cytotoxic T-lymphocyte-associated serine esterase 3)	2.09898	up	1.90272	up
225353_s_at	C1QC	complement component 1, q subcomponent, C chain	2.05511	up	1.71037	up
226184_at	FMNL2	formin-like 2	2.05308	up	1.84021	up
207509_s_at	LAIR2	leukocyte-associated immunoglobulin-like receptor 2	2.04796	up	2.04165	up
212843_at	NCAM1	neural cell adhesion molecule 1	2.02178	up	1.66813	up
204103_at	CCL4	chemokine (C-C motif) ligand 4	1.9932	up	2.37923	up
228774_at	CEP78	centrosomal protein 78kDa	1.9797	up	1.58647	up
1561880_a_at	SIGLEC16	sialic acid binding Ig-like lectin 16 (gene/pseudogene)	1.95638	up	1.67404	up
210288_at	KLRG1	killer cell lectin-like receptor subfamily G, member 1	1.9503	up	1.55598	up
209198_s_at	SYT11	synaptotagmin XI	1.94158	up	1.73695	up
240413_at	PYHIN1	pyrin and HIN domain family, member 1	1.93391	up	1.54435	up
219304_s_at	PDGFD	platelet derived growth factor D	1.92432	up	1.75101	up
214995_s_at	APOBEC3F /// APOBEC3G	apolipoprotein B mRNA editing enzyme, catalytic polypeptide-like 3F /// apolipop	1.90104	up	1.78487	up
206518_s_at	RGS9	regulator of G-protein signaling 9	1.89048	up	1.66622	up
219566_at	PLEKHF1	pleckstrin homology domain containing, family F (with FYVE domain) member 1	1.88798	up	1.55443	up
210140_at	CST7	cystatin F (leukocystatin)	1.87184	up	1.87561	up
209995_s_at	TCL1A	T-cell leukemia/lymphoma 1A	1.87093	up	2.41104	up
1405_i_at	CCL5	chemokine (C-C motif) ligand 5	1.8662	up	1.68447	up
207840_at	CD160	CD160 molecule	1.86297	up	1.63051	up
209948_at	KCNMB1	potassium large conductance calcium-activated channel, subfamily M, beta member	1.857	up	1.40528	up
214450_at	CTSW	cathepsin W	1.8534	up	1.55598	up
206974_at	CXCR6	chemokine (C-X-C motif) receptor 6	1.84184	up	1.46594	up
231323_at	PSMB2	proteasome (prosome, macropain) subunit, beta type, 2	1.82743	up	1.93535	up
1568934_at	CX3CR1	chemokine (C-X3-C motif) receptor 1	1.82399	up	2.38909	up
241525_at	LOC200772	hypothetical protein LOC200772	1.80559	up	1.4686	up
210865_at	FASLG	Fas ligand (TNF superfamily, member 6)	1.79456	up	2.24579	up
217381_s_at	TRGV5	T cell receptor gamma variable 5	1.77228	up	1.60573	up
207794_at	CCR2	chemokine (C-C motif) receptor 2	1.76945	up	1.4602	up
236769_at	LOC158402	hypothetical protein LOC158402	1.76085	up	1.83714	up
230563_at	RASGEF1A	RasGEF domain family, member 1A	1.75471	up	1.92809	up
236833_at	TTC16	tetratricopeptide repeat domain 16	1.74426	up	1.56071	up
214567_s_at	XCL1 /// XCL2	chemokine (C motif) ligand 1 /// chemokine (C motif) ligand 2	1.73693	up	2.17793	up
225731_at	ANKRD50	ankyrin repeat domain 50	1.72769	up	1.4391	up
232504_at	LOC285628	hypothetical protein LOC285628	1.72519	up	2.20676	up
206028_s_at	MERTK	c-mer proto-oncogene tyrosine kinase	1.72322	up	1.48475	up
229971_at	GPR114	G protein-coupled receptor 114	1.7161	up	1.84844	up
213182_x_at	CDKN1C	cyclin-dependent kinase inhibitor 1C (p57, Kip2)	1.71019	up	1.52495	up
206366_x_at	XCL1	chemokine (C motif) ligand 1	1.70613	up	2.02016	up
225688_s_at	PHLDB2	pleckstrin homology-like domain, family B, member 2	1.70465	up	1.716	up
215806_x_at	TARP /// TRGC2	TCR gamma alternate reading frame protein /// T cell receptor gamma constant 2	1.69931	up	1.65156	up
214511_x_at	FCGR1B	Fc fragment of IgG, high affinity Ib, receptor (CD64)	1.69907	up	1.42334	up
227803_at	ENPP5	ectonucleotide pyrophosphatase/phosphodiesterase 5 (putative function)	1.69244	up	1.72684	up
211597_s_at	HOPX	HOP homeobox	1.67716	up	2.07539	up
207681_at	CXCR3	chemokine (C-X-C motif) receptor 3	1.67215	up	1.52371	up
203713_s_at	LLGL2	lethal giant larvae homolog 2 (Drosophila)	1.65995	up	1.63715	up
236692_at	LOC729839	similar to DTW domain containing 2	1.65518	up	1.57484	up
1569401_at	CLEC12A	C-type lectin domain family 12, member A	1.64847	up	1.49819	up
209789_at	CORO2B	coronin, actin binding protein, 2B	1.63802	up	1.94739	up
228937_at	C13orf31	chromosome 13 open reading frame 31	1.63545	up	1.61325	up
236313_at	CDKN2B	cyclin-dependent kinase inhibitor 2B (p15, inhibits CDK4)	1.63461	up	1.94754	up
225647_s_at	CTSC	cathepsin C	1.62862	up	1.64858	up
222285_at	IGHD	immunoglobulin heavy constant delta	1.62131	up	1.60261	up
201681_s_at	DLG5	discs, large homolog 5 (Drosophila)	1.60345	up	1.75995	up
216552_x_at	KIR2DS4	killer cell immunoglobulin-like receptor, two domains, short cytoplasmic tail, 4	1.58756	up	1.52681	up
230422_at	FPR3	formyl peptide receptor 3	1.58399	up	1.60175	up
200974_at	ACTA2	actin, alpha 2, smooth muscle, aorta	1.57567	up	1.49567	up
1555728_a_at	MS4A4A	membrane-spanning 4-domains, subfamily A, member 4	1.55908	up	1.60343	up
203908_at	SLC4A4	solute carrier family 4, sodium bicarbonate cotransporter, member 4	1.55043	up	1.78944	up
1568593_a_at	NUDT16P	nudix (nucleoside diphosphate linked moiety X)-type motif 16 pseudogene	1.5413	up	1.43353	up
227168_at	MIAT	myocardial infarction associated transcript (non-protein coding)	1.53324	up	1.40322	up
1552806_a_at	SIGLEC10 /// SIGLEC12	sialic acid binding Ig-like lectin 10 /// sialic acid binding Ig-like lectin 12	1.53219	up	1.26288	up
205992_s_at	IL15	interleukin 15	1.51853	up	1.30474	up
215925_s_at	CD72	CD72 molecule	1.49176	up	1.85301	up
229893_at	FRMD3	FERM domain containing 3	1.457	up	1.28408	up
206589_at	GFI1	growth factor independent 1 transcription repressor	1.45481	up	1.71009	up
230756_at	ZNF683	zinc finger protein 683	1.45397	up	1.87503	up
220785_at	UTS2	urotensin 2	1.41244	up	1.50876	up
243623_at	SLC1A7	solute carrier family 1 (glutamate transporter), member 7	1.41239	up	1.40491	up
238581_at	GBP5	guanylate binding protein 5	1.39823	up	1.55908	up
204790_at	SMAD7	SMAD family member 7	1.39377	up	1.64583	up
1563229_at	DLEU2	deleted in lymphocytic leukemia 2 (non-protein coding)	1.39283	up	1.89548	up
205987_at	CD1C	CD1c molecule	1.34107	up	1.25221	up
230708_at	PRICKLE1	prickle homolog 1 (Drosophila)	1.30031	up	1.47027	up
212509_s_at	MXRA7	matrix-remodelling associated 7	1.27735	up	1.39365	up
218815_s_at	TMEM51	transmembrane protein 51	1.24606	up	1.24872	up
204059_s_at	ME1	malic enzyme 1, NADP(+)-dependent, cytosolic	1.19605	up	1.51699	up

## Sheet: down shared in IF and ID group
shared genes downregulated by HSCT in IF and ID groups
probe set ID	Gene Symbol	Gene name(Description)	Fold change(T/D)in IF	Up/down in IF	Fold change(T/D) in ID	Up/down in ID
201737_s_at	6.Mar	membrane-associated ring finger (C3HC4) 6	0.552919	down	0.622394	down
200965_s_at	ABLIM1	actin binding LIM protein 1	0.467002	down	0.349334	down
211207_s_at	ACSL6	acyl-CoA synthetase long-chain family member 6	0.411571	down	0.548412	down
1552519_at	ACVR1C	activin A receptor, type IC	0.332363	down	0.509801	down
203321_s_at	ADNP2	ADNP homeobox 2	0.657118	down	0.587156	down
238468_at	ADSL /// TNRC6B	adenylosuccinate lyase /// trinucleotide repeat containing 6B	0.669243	down	0.492193	down
232864_s_at	AFF4	AF4/FMR2 family, member 4	0.653713	down	0.584641	down
219308_s_at	AK5	adenylate kinase 5	0.369709	down	0.561036	down
203608_at	ALDH5A1	aldehyde dehydrogenase 5 family, member A1	0.576878	down	0.608514	down
226718_at	AMIGO1	adhesion molecule with Ig-like domain 1	0.419558	down	0.454356	down
206385_s_at	ANK3	ankyrin 3, node of Ranvier (ankyrin G)	0.360058	down	0.409976	down
228471_at	ANKRD44	ankyrin repeat domain 44	0.728342	down	0.647086	down
220112_at	ANKRD55	ankyrin repeat domain 55	0.20621	down	0.358849	down
209870_s_at	APBA2	amyloid beta (A4) precursor protein-binding, family A, member 2	0.510236	down	0.494334	down
39248_at	AQP3	aquaporin 3 (Gill blood group)	0.517689	down	0.492915	down
236533_at	ASAP1	ArfGAP with SH3 domain, ankyrin repeat and PH domain 1	0.533792	down	0.429365	down
217550_at	ATF6	Activating transcription factor 6	0.586701	down	0.607107	down
219359_at	ATHL1	ATH1, acid trehalase-like 1 (yeast)	0.48333	down	0.473565	down
222696_at	AXIN2	axin 2	0.38533	down	0.529615	down
221234_s_at	BACH2	BTB and CNC homology 1, basic leucine zipper transcription factor 2	0.47995	down	0.50348	down
211948_x_at	BAT2D1	BAT2 domain containing 1	0.633247	down	0.505014	down
213015_at	BBX	bobby sox homolog (Drosophila)	0.528278	down	0.517727	down
220588_at	BCAS4	breast carcinoma amplified sequence 4	0.488528	down	0.65451	down
222895_s_at	BCL11B	B-cell CLL/lymphoma 11B (zinc finger protein)	0.40806	down	0.311307	down
224367_at	BEX2	brain expressed X-linked 2	0.333952	down	0.380016	down
229963_at	BEX5	brain expressed, X-linked 5	0.273494	down	0.501323	down
1559975_at	BTG1	B-cell translocation gene 1, anti-proliferative	0.436976	down	0.519215	down
236816_at	C12orf30	chromosome 12 open reading frame 30	0.479681	down	0.352744	down
224719_s_at	C12orf57	chromosome 12 open reading frame 57	0.587953	down	0.663405	down
218723_s_at	C13orf15	chromosome 13 open reading frame 15	0.33078	down	0.352584	down
219757_s_at	C14orf101	chromosome 14 open reading frame 101	0.569116	down	0.556814	down
1559097_at	C14orf64	chromosome 14 open reading frame 64	0.316277	down	0.193342	down
232094_at	C15orf29	chromosome 15 open reading frame 29	0.622428	down	0.586282	down
239660_at	C20orf74	chromosome 20 open reading frame 74	0.52544	down	0.503751	down
223623_at	C2orf40	chromosome 2 open reading frame 40	0.198499	down	0.341785	down
232330_at	C7orf44	Chromosome 7 open reading frame 44	0.636596	down	0.534713	down
206873_at	CA6	carbonic anhydrase VI	0.467831	down	0.437562	down
221631_at	CACNA1I	calcium channel, voltage-dependent, T type, alpha 1I subunit	0.314915	down	0.396392	down
241871_at	CAMK4	calcium/calmodulin-dependent protein kinase IV	0.454018	down	0.457085	down
213547_at	CAND2	cullin-associated and neddylation-dissociated 2 (putative)	0.593373	down	0.681603	down
1555920_at	CBX3	Chromobox homolog 3 (HP1 gamma homolog, Drosophila)	0.650662	down	0.645939	down
226085_at	CBX5	chromobox homolog 5 (HP1 alpha homolog, Drosophila)	0.397287	down	0.432255	down
227299_at	CCNI	Cyclin I	0.63657	down	1.64623	up
206337_at	CCR7	chemokine (C-C motif) receptor 7	0.185333	down	0.106392	down
206150_at	CD27	CD27 molecule	0.639508	down	0.508991	down
1566448_at	CD6	CD6 molecule	0.501702	down	0.422061	down
210742_at	CDC14A	CDC14 cell division cycle 14 homolog A (S. cerevisiae)	0.541642	down	0.32631	down
224851_at	CDK6	cyclin-dependent kinase 6	0.560674	down	0.521259	down
209501_at	CDR2	cerebellar degeneration-related protein 2, 62kDa	0.614218	down	0.568967	down
226610_at	CENPV	centromere protein V	0.57985	down	0.631571	down
212677_s_at	CEP68	centrosomal protein 68kDa	0.434516	down	0.50108	down
219036_at	CEP70	centrosomal protein 70kDa	0.6662	down	0.614812	down
244443_at	CHD2	Chromodomain helicase DNA binding protein 2	0.641656	down	0.427974	down
218829_s_at	CHD7	chromodomain helicase DNA binding protein 7	0.470857	down	0.605202	down
212313_at	CHMP7	CHMP family, member 7	0.597649	down	0.551969	down
229116_at	CNKSR2	connector enhancer of kinase suppressor of Ras 2	0.322417	down	0.406798	down
201438_at	COL6A3	collagen, type VI, alpha 3	0.438551	down	0.375336	down
219049_at	CSGALNACT1	chondroitin sulfate N-acetylgalactosaminyltransferase 1	0.383728	down	0.630352	down
214731_at	CTTNBP2NL	CTTNBP2 N-terminal like	0.734089	down	0.660825	down
217028_at	CXCR4	chemokine (C-X-C motif) receptor 4	0.597098	down	0.587406	down
242292_at	CXorf50B	chromosome X open reading frame 50B	0.384304	down	0.427421	down
221905_at	CYLD	cylindromatosis (turban tumor syndrome)	0.528679	down	0.415509	down
222101_s_at	DCHS1	dachsous 1 (Drosophila)	0.339909	down	0.36547	down
208895_s_at	DDX18	DEAD (Asp-Glu-Ala-Asp) box polypeptide 18	0.654086	down	0.594764	down
203385_at	DGKA	diacylglycerol kinase, alpha 80kDa	0.511141	down	0.475874	down
206061_s_at	DICER1	dicer 1, ribonuclease type III	0.589807	down	0.468976	down
1558080_s_at	DNAJC3	DnaJ (Hsp40) homolog, subfamily C, member 3	0.594657	down	0.586881	down
212538_at	DOCK9	dedicator of cytokinesis 9	0.544757	down	0.555608	down
207324_s_at	DSC1	desmocollin 1	0.397832	down	0.564576	down
224336_s_at	DUSP16	dual specificity phosphatase 16	0.533997	down	0.616852	down
218552_at	ECHDC2	enoyl Coenzyme A hydratase domain containing 2	0.729166	down	0.722948	down
220048_at	EDAR	ectodysplasin A receptor	0.423977	down	0.582783	down
208705_s_at	EIF5	eukaryotic translation initiation factor 5	0.70408	down	0.655272	down
214153_at	ELOVL5	ELOVL family member 5, elongation of long chain fatty acids (FEN1/Elo2, SUR4/Elo	0.602231	down	0.575519	down
213645_at	ENOSF1	enolase superfamily member 1	0.542798	down	0.611901	down
205977_s_at	EPHA1	EPH receptor A1	0.344092	down	0.477684	down
209368_at	EPHX2	epoxide hydrolase 2, cytoplasmic	0.254386	down	0.293375	down
232165_at	EPPK1	epiplakin 1	0.3503	down	0.356247	down
212400_at	FAM102A	family with sequence similarity 102, member A	0.393801	down	0.363775	down
228298_at	FAM113B	family with sequence similarity 113, member B	0.621078	down	0.490146	down
218510_x_at	FAM134B	family with sequence similarity 134, member B	0.372575	down	0.23758	down
215133_s_at	FAM153A /// FAM153B	family with sequence similarity 153, member A /// family with sequence similarit	0.333555	down	0.6945	down
214945_at	FAM153A /// FAM153B /// FAM153C	family with sequence similarity 153, member A /// family with sequence similarit	0.128299	down	0.278818	down
212771_at	FAM171A1	family with sequence similarity 171, member A1	0.448174	down	0.4351	down
225864_at	FAM84B	family with sequence similarity 84, member B	0.507273	down	0.624985	down
232063_x_at	FARSB	phenylalanyl-tRNA synthetase, beta subunit	0.496657	down	0.616678	down
227641_at	FBXL16	F-box and leucine-rich repeat protein 16	0.440865	down	0.527634	down
203240_at	FCGBP	Fc fragment of IgG binding protein	0.534519	down	0.500074	down
206492_at	FHIT	fragile histidine triad gene	0.249928	down	0.446166	down
201540_at	FHL1	four and a half LIM domains 1	0.66633	down	0.70898	down
244761_at	FLJ44606	Hypothetical gene supported by AK126569	0.538826	down	0.677602	down
202723_s_at	FOXO1	forkhead box O1	0.531039	down	0.411858	down
1558996_at	FOXP1	forkhead box P1	0.543236	down	0.406266	down
213524_s_at	G0S2	G0/G1switch 2	0.329607	down	0.406424	down
218885_s_at	GALNT12	UDP-N-acetyl-alpha-D-galactosamine:polypeptide N-acetylgalactosaminyltransferase	0.432957	down	0.468805	down
238807_at	GAPDHL7	glyceraldehyde-3-phosphate dehydrogenase-like 7	0.651272	down	0.576286	down
205929_at	GPA33	glycoprotein A33 (transmembrane)	0.514634	down	0.542815	down
204793_at	GPRASP1	G protein-coupled receptor associated sorting protein 1	0.207298	down	0.178356	down
202554_s_at	GSTM3	glutathione S-transferase mu 3 (brain)	0.379111	down	0.517821	down
1559050_at	HCG27	HLA complex group 27	0.634054	down	0.7346	down
212291_at	HIPK1	homeodomain interacting protein kinase 1	0.532908	down	0.403085	down
212641_at	HIVEP2	human immunodeficiency virus type I enhancer binding protein 2	0.524706	down	0.374064	down
214918_at	HNRNPM	heterogeneous nuclear ribonucleoprotein M	0.637324	down	0.585376	down
225792_at	HOOK1	hook homolog 1 (Drosophila)	0.236666	down	0.353321	down
210439_at	ICOS	inducible T-cell co-stimulator	0.589588	down	0.482951	down
242903_at	IFNGR1	interferon gamma receptor 1	0.403646	down	0.48397	down
203628_at	IGF1R	insulin-like growth factor 1 receptor	0.261419	down	0.330038	down
212196_at	IL6ST	interleukin 6 signal transducer (gp130, oncostatin M receptor)	0.434071	down	0.40976	down
205798_at	IL7R	interleukin 7 receptor	0.39923	down	0.23482	down
202859_x_at	IL8	interleukin 8	0.442192	down	0.445625	down
214705_at	INADL	InaD-like (Drosophila)	0.338466	down	0.495388	down
201656_at	ITGA6	integrin, alpha 6	0.400245	down	0.330086	down
212813_at	JAM3	junctional adhesion molecule 3	0.471423	down	0.585317	down
224933_s_at	JMJD1C	jumonji domain containing 1C	0.607393	down	0.540356	down
213005_s_at	KANK1	KN motif and ankyrin repeat domains 1	0.357776	down	0.527396	down
1556067_a_at	KDM6B	lysine (K)-specific demethylase 6B	0.609145	down	0.673183	down
219724_s_at	KIAA0748	KIAA0748	0.541096	down	0.476492	down
243589_at	KIAA1267 /// LOC100294337	KIAA1267 /// hypothetical protein LOC100294337	0.460273	down	0.521262	down
203130_s_at	KIF5C	kinesin family member 5C	0.623778	down	0.589981	down
203542_s_at	KLF9	Kruppel-like factor 9	0.289645	down	0.313047	down
221221_s_at	KLHL3	kelch-like 3 (Drosophila)	0.519635	down	0.461837	down
214039_s_at	LAPTM4B	lysosomal protein transmembrane 4 beta	0.394705	down	0.602478	down
244556_at	LCP2	lymphocyte cytosolic protein 2 (SH2 domain containing leukocyte protein of 76kDa	0.645216	down	0.49647	down
221790_s_at	LDLRAP1	low density lipoprotein receptor adaptor protein 1	0.411675	down	0.323779	down
221558_s_at	LEF1	lymphoid enhancer-binding factor 1	0.273796	down	0.188453	down
1557996_at	LOC100132832 /// PMS2L1 /// PMS2L2	postmeiotic segregation increased 2-like 5-like /// postmeiotic segregation incr	0.734135	down	0.622496	down
215123_at	LOC100288332 /// LOC100288583 /// NPIPL3	similar to acyl-CoA synthetase medium-chain family member 2 /// hypothetical pro	0.498585	down	0.360486	down
1566040_at	LOC100288656	similar to hCG2003116	0.271386	down	0.465857	down
241535_at	LOC100292909	hypothetical protein LOC100292909	0.450514	down	0.520999	down
227867_at	LOC129293	hypothetical protein LOC129293	0.205156	down	0.150147	down
1564150_a_at	LOC256021	hypothetical protein LOC256021	0.55261	down	0.587069	down
222307_at	LOC282997	hypothetical protein LOC282997	0.431441	down	0.487738	down
232001_at	LOC439949	hypothetical protein LOC439949	0.385636	down	0.426371	down
243362_s_at	LOC641518	hypothetical protein LOC641518	0.18905	down	0.149714	down
227223_at	LOC643167 /// RBM39	similar to RNA binding motif protein 39 /// RNA binding motif protein 39	0.643226	down	0.440614	down
1569872_a_at	LOC650392	Hypothetical protein LOC650392	0.232456	down	0.199724	down
215599_at	LOC653188	glucuronidase, beta pseudogene	0.667642	down	0.66954	down
227383_at	LOC727820	hypothetical protein LOC727820	0.58929	down	0.406658	down
238534_at	LRRFIP1	Leucine rich repeat (in FLII) interacting protein 1	0.578677	down	0.314128	down
209840_s_at	LRRN3	leucine rich repeat neuronal 3	0.118044	down	0.0360895	down
208190_s_at	LSR	lipolysis stimulated lipoprotein receptor	0.405012	down	0.398627	down
219922_s_at	LTBP3	latent transforming growth factor beta binding protein 3	0.460452	down	0.426855	down
231840_x_at	LYRM7	Lyrm7 homolog (mouse)	0.722231	down	0.58035	down
204777_s_at	MAL	mal, T-cell differentiation protein	0.21534	down	0.182574	down
224559_at	MALAT1	metastasis associated lung adenocarcinoma transcript 1 (non-protein coding)	0.444982	down	0.510331	down
214180_at	MAN1C1	mannosidase, alpha, class 1C, member 1	0.454583	down	0.475076	down
1558732_at	MAP4K4	mitogen-activated protein kinase kinase kinase kinase 4	0.694898	down	0.551591	down
222348_at	MAST4	Microtubule associated serine/threonine kinase family member 4	0.436221	down	0.408408	down
235879_at	MBNL1	Muscleblind-like (Drosophila)	0.583453	down	0.378124	down
1562731_s_at	MDS2	myelodysplastic syndrome 2 translocation associated	0.222684	down	0.225944	down
202016_at	MEST	mesoderm specific transcript homolog (mouse)	0.468482	down	0.503122	down
1569136_at	MGAT4A	Mannosyl (alpha-1,3-)-glycoprotein beta-1,4-N-acetylglucosaminyltransferase, iso	0.392086	down	0.503827	down
244740_at	MGC9913	hypothetical protein MGC9913	0.69287	down	0.741531	down
222413_s_at	MLL3	myeloid/lymphoid or mixed-lineage leukemia 3	0.449199	down	0.39508	down
239272_at	MMP28	matrix metallopeptidase 28	0.297315	down	0.468881	down
1570585_at	MPZL3	myelin protein zero-like 3	0.589698	down	0.457864	down
225237_s_at	MSI2	musashi homolog 2 (Drosophila)	0.539082	down	0.670139	down
212096_s_at	MTUS1	mitochondrial tumor suppressor 1	0.306785	down	0.32299	down
228097_at	MYLIP	myosin regulatory light chain interacting protein	0.54753	down	0.425432	down
243296_at	NAMPT	Nicotinamide phosphoribosyltransferase	0.497732	down	0.350689	down
242191_at	NBPF10	neuroblastoma breakpoint family, member 10	0.477057	down	0.494601	down
215850_s_at	NDUFA5	NADH dehydrogenase (ubiquinone) 1 alpha subcomplex, 5, 13kDa	0.696321	down	0.576219	down
203413_at	NELL2	NEL-like 2 (chicken)	0.138978	down	0.1258	down
201830_s_at	NET1	neuroepithelial cell transforming 1	0.524096	down	0.524809	down
217963_s_at	NGFRAP1	nerve growth factor receptor (TNFRSF16) associated protein 1	0.451096	down	0.511933	down
215069_at	NMT2	N-myristoyltransferase 2	0.584703	down	0.558917	down
231798_at	NOG	noggin	0.0811933	down	0.0802208	down
209750_at	NR1D2	nuclear receptor subfamily 1, group D, member 2	0.402831	down	0.518403	down
205259_at	NR3C2	nuclear receptor subfamily 3, group C, member 2	0.22834	down	0.321709	down
204105_s_at	NRCAM	neuronal cell adhesion molecule	0.306824	down	0.380459	down
202600_s_at	NRIP1	nuclear receptor interacting protein 1	0.448601	down	0.313109	down
225044_at	NT5C3L	5'-nucleotidase, cytosolic III-like	0.728337	down	0.758592	down
203939_at	NT5E	5'-nucleotidase, ecto (CD73)	0.249856	down	0.290656	down
229838_at	NUCB2	nucleobindin 2	0.51785	down	0.443409	down
241425_at	NUPL1	Nucleoporin like 1	0.451308	down	0.387171	down
227686_at	OXNAD1	oxidoreductase NAD-binding domain containing 1	0.330856	down	0.325812	down
238706_at	PAPD4	PAP associated domain containing 4	0.556742	down	0.40466	down
213534_s_at	PASK	PAS domain containing serine/threonine kinase	0.44299	down	0.355625	down
229467_at	PCBP2	Poly(rC) binding protein 2	0.584251	down	0.434605	down
215175_at	PCNX	pecanex homolog (Drosophila)	0.698264	down	0.451289	down
214582_at	PDE3B	phosphodiesterase 3B, cGMP-inhibited	0.480244	down	0.41154	down
1552343_s_at	PDE7A	phosphodiesterase 7A	0.55739	down	0.438671	down
205593_s_at	PDE9A	phosphodiesterase 9A	0.376546	down	0.4163	down
226452_at	PDK1	pyruvate dehydrogenase kinase, isozyme 1	0.420503	down	0.473122	down
232213_at	PELI1	Pellino homolog 1 (Drosophila)	0.663461	down	0.447584	down
229553_at	PGM2L1	phosphoglucomutase 2-like 1	0.603002	down	0.583528	down
232279_at	PHF15	PHD finger protein 15	0.658891	down	0.666223	down
1555632_at	PIK3IP1	phosphoinositide-3-kinase interacting protein 1	0.586977	down	0.628796	down
204612_at	PKIA	protein kinase (cAMP-dependent, catalytic) inhibitor alpha	0.386177	down	0.403059	down
212629_s_at	PKN2	protein kinase N2	0.622002	down	0.507393	down
205372_at	PLAG1	pleiomorphic adenoma gene 1	0.396781	down	0.555983	down
209504_s_at	PLEKHB1	pleckstrin homology domain containing, family B (evectins) member 1	0.340274	down	0.328476	down
214081_at	PLXDC1	plexin domain containing 1	0.409289	down	0.355975	down
229809_at	POU6F1	POU class 6 homeobox 1	0.400352	down	0.6174	down
202165_at	PPP1R2	protein phosphatase 1, regulatory (inhibitor) subunit 2	0.585833	down	0.534618	down
227412_at	PPP1R3E	protein phosphatase 1, regulatory (inhibitor) subunit 3E	0.481739	down	0.593765	down
213093_at	PRKCA	protein kinase C, alpha	0.374059	down	0.399944	down
230270_at	PRPF38B	PRP38 pre-mRNA processing factor 38 (yeast) domain containing B	0.555335	down	0.561179	down
231173_at	PYROXD1	pyridine nucleotide-disulphide oxidoreductase domain 1	0.598471	down	0.625264	down
243496_at	RAB18	RAB18, member RAS oncogene family	0.54315	down	0.490292	down
1555247_a_at	RAPGEF6	Rap guanine nucleotide exchange factor (GEF) 6	0.50821	down	0.449897	down
228109_at	RASGRF2	Ras protein-specific guanine nucleotide-releasing factor 2	0.251932	down	0.174382	down
226272_at	RCAN3	RCAN family member 3	0.323319	down	0.284767	down
226989_at	RGMB	RGM domain family, member B	0.303496	down	0.604065	down
228248_at	RICTOR	RPTOR independent companion of MTOR, complex 2	0.527689	down	0.408034	down
1568665_at	RNF103	ring finger protein 103	0.535867	down	0.538513	down
213194_at	ROBO1	roundabout, axon guidance receptor, homolog 1 (Drosophila)	0.453324	down	0.473549	down
1557465_at	RP11-327P2.4	hypothetical LOC283521	0.193321	down	0.209504	down
1566079_at	RPS16P5	ribosomal protein S16 pseudogene 5	0.702917	down	0.477785	down
236858_s_at	RUNX2	runt-related transcription factor 2	0.512357	down	0.427584	down
209686_at	S100B	S100 calcium binding protein B	0.475398	down	0.443609	down
203408_s_at	SATB1	SATB homeobox 1	0.435396	down	0.350681	down
218793_s_at	SCML1	sex comb on midleg-like 1 (Drosophila)	0.36543	down	0.293474	down
226051_at	SELM	selenoprotein M	0.394109	down	0.622237	down
212190_at	SERPINE2	serpin peptidase inhibitor, clade E (nexin, plasminogen activator inhibitor type	0.484814	down	0.534917	down
243759_at	SFRS15	Splicing factor, arginine/serine-rich 15	0.437085	down	0.407842	down
230375_at	SFRS18	splicing factor, arginine/serine-rich 18	0.515351	down	0.359257	down
204019_s_at	SH3YL1	SH3 domain containing, Ysc84-like 1 (S. cerevisiae)	0.444275	down	0.571231	down
220485_s_at	SIRPG	signal-regulatory protein gamma	0.586119	down	0.460973	down
201917_s_at	SLC25A36	solute carrier family 25, member 36	0.523347	down	0.392364	down
222528_s_at	SLC25A37	solute carrier family 25, member 37	0.371587	down	0.558056	down
236367_at	SMG7	Smg-7 homolog, nonsense mediated mRNA decay factor (C. elegans)	0.575094	down	0.471192	down
1560741_at	SNRPN	small nuclear ribonucleoprotein polypeptide N	0.515396	down	0.419454	down
223028_s_at	SNX9	sorting nexin 9	0.454203	down	0.372215	down
230707_at	SORL1	sortilin-related receptor, L(DLR class) A repeats-containing	0.5589	down	0.381947	down
206310_at	SPINK2	serine peptidase inhibitor, Kazal type 2 (acrosin-trypsin inhibitor)	0.387079	down	0.496613	down
226342_at	SPTBN1	spectrin, beta, non-erythrocytic 1	0.533073	down	0.461607	down
236431_at	SR140	U2-associated SR140 protein	0.720388	down	0.659114	down
238303_at	STT3B	STT3, subunit of the oligosaccharyltransferase complex, homolog B (S. cerevisiae	0.368144	down	0.352512	down
230005_at	SVIP	small VCP/p97-interacting protein	0.53187	down	0.575144	down
210612_s_at	SYNJ2	synaptojanin 2	0.417758	down	0.522623	down
1553165_at	SYNRG	synergin, gamma	0.804172	down	0.65397	down
235020_at	TAF4B	TAF4b RNA polymerase II, TATA box binding protein (TBP)-associated factor, 105kD	0.599294	down	0.512906	down
228483_s_at	TAF9B	TAF9B RNA polymerase II, TATA box binding protein (TBP)-associated factor, 31kDa	0.530315	down	0.54871	down
203386_at	TBC1D4	TBC1 domain family, member 4	0.52241	down	0.571277	down
226388_at	TCEA3	transcription elongation factor A (SII), 3	0.291038	down	0.346753	down
205254_x_at	TCF7	transcription factor 7 (T-cell specific, HMG-box)	0.400169	down	0.333648	down
1559413_at	TCP11L2	t-complex 11 (mouse)-like 2	0.531101	down	0.477751	down
229253_at	THEM4	thioesterase superfamily member 4	0.51659	down	0.468712	down
216997_x_at	TLE4	transducin-like enhancer of split 4 (E(sp1) homolog, Drosophila)	0.677101	down	0.581059	down
219315_s_at	TMEM204	transmembrane protein 204	0.480126	down	0.459396	down
214833_at	TMEM63A	transmembrane protein 63A	0.677329	down	0.509451	down
244716_x_at	TMIGD2	transmembrane and immunoglobulin domain containing 2	0.667115	down	0.531339	down
219423_x_at	TNFRSF25	tumor necrosis factor receptor superfamily, member 25	0.607511	down	0.482806	down
232097_at	TOX4	TOX high mobility group box family member 4	0.58968	down	0.584178	down
213575_at	TRA2A	transformer 2 alpha homolog (Drosophila)	0.681358	down	0.54931	down
210438_x_at	TROVE2	TROVE domain family, member 2	0.650294	down	0.590046	down
213922_at	TTBK2	tau tubulin kinase 2	0.689684	down	0.608292	down
208662_s_at	TTC3	tetratricopeptide repeat domain 3	0.516068	down	0.366589	down
239163_at	UBE2B	ubiquitin-conjugating enzyme E2B (RAD6 homolog)	0.333869	down	0.391714	down
240383_at	UBE2D3	ubiquitin-conjugating enzyme E2D 3 (UBC4/5 homolog, yeast)	0.609976	down	0.531796	down
1558569_at	UNQ6228	Hypothetical LOC100131541	0.492861	down	0.235588	down
233595_at	USP34	ubiquitin specific peptidase 34	0.518608	down	0.451139	down
230083_at	USP53	ubiquitin specific peptidase 53	0.358255	down	0.497596	down
243764_at	VSIG1	V-set and immunoglobulin domain containing 1	0.401695	down	0.424438	down
213908_at	WHAMML1 /// WHAMML2	WAS protein homolog associated with actin, golgi membranes and microtubules-like	0.493854	down	0.658678	down
240168_at	XPO7	exportin 7	0.56135	down	0.521272	down
1557065_at	YLPM1	YLP motif containing 1	0.529504	down	0.366718	down
232216_at	YME1L1	YME1-like 1 (S. cerevisiae)	0.52608	down	0.442116	down
205383_s_at	ZBTB20	zinc finger and BTB domain containing 20	0.607082	down	0.501674	down
222186_at	ZFAND6	Zinc finger, AN1-type domain 6	0.513534	down	0.433192	down
1553736_at	ZFC3H1	zinc finger, C3H1-type containing	0.589715	down	0.687612	down
226344_at	ZMAT1	zinc finger, matrin type 1	0.487059	down	0.523476	down
1552634_a_at	ZNF101	zinc finger protein 101	0.483736	down	0.591977	down
1554021_a_at	ZNF12	zinc finger protein 12	0.547249	down	0.455039	down
214823_at	ZNF204	zinc finger protein 204 pseudogene	0.338386	down	0.528528	down
203247_s_at	ZNF24	zinc finger protein 24	0.583483	down	0.582084	down
218401_s_at	ZNF281	zinc finger protein 281	0.728613	down	0.585098	down
219228_at	ZNF331	zinc finger protein 331	0.487471	down	0.647908	down
215012_at	ZNF451	zinc finger protein 451	0.635972	down	0.613099	down
1558486_at	ZNF493	zinc finger protein 493	0.527397	down	0.449525	down
211721_s_at	ZNF551	zinc finger protein 551	0.643812	down	0.551099	down
239243_at	ZNF638	zinc finger protein 638	0.59911	down	0.570441	down
218312_s_at	ZSCAN18	zinc finger and SCAN domain containing 18	0.44957	down	0.464526	down

## Sheet: other genes 
other genes regulated by HSCT in IF and ID groups
probe set ID	Gene Symbol	Gene name(Description)	Fold change(T/D)in IF	Up/down in IF	Fold change(T/D)in ID	Up/down in ID
220613_s_at	SYTL2	synaptotagmin-like 2	1.32851	up	0.69348	down
222407_s_at	ZFP106	zinc finger protein 106 homolog (mouse)	1.24688	up	0.663136	down
